# Supplementary material
Source: PubMed Central journal article supplement (PMC7153281)
Supplement: ml0c00004_si_001.pdf [file ml0c00004_si_001.pdf]

## Implementation of the CYP Index for the design of selective tryptophan-2,3-dioxygenase (TDO) inhibitors

Brendan T. Parr,<sup>\*,†</sup> Richard Pastor,<sup>†</sup> Benjamin D. Sellers,<sup>†</sup> Zhonghua Pei,<sup>†</sup> Firoz A. Jaipuri,<sup>†</sup> Georgette M. Castanedo,<sup>†</sup> Lewis Gazzard,<sup>†</sup> Sanjeev Kumar,<sup>†</sup> Xiaokai Li,<sup>†</sup> Wen Liu,<sup>†</sup> Rohan Mendonca,<sup>†</sup> Roheeth K. Pavana,<sup>†</sup> Hima Potturi,<sup>†</sup> Cheng Shao,<sup>§</sup> Venkata Velvadapu,<sup>†</sup> Jesse P. Waldo,<sup>†</sup> Guosheng Wu,<sup>§</sup> Po-wai Yuen,<sup>§</sup> Zuhui Zhang,<sup>†</sup> Yamin Zhang,<sup>§</sup> Seth F. Harris,<sup>†</sup> Angela J. Oh,<sup>†</sup> Antonio DiPasquale,<sup>†</sup> Kevin DeMent,<sup>†</sup> Hank La,<sup>†</sup> Leanne Goon,<sup>†</sup> Amy Gustafson,<sup>†</sup> Erica C. VanderPorten,<sup>†</sup> Mario R. Mautino<sup>†</sup> and Yichin Liu<sup>†</sup>

<sup>†</sup> Genentech, South San Francisco, California 94080, United States

<sup>‡</sup> NewLink Genetics, Ames, Iowa 50010, United States

<sup>§</sup> Pharmaron, Beijing, People's Republic of China 100176

### TABLE OF CONTENTS

|                                                   |      |
|---------------------------------------------------|------|
| General Information                               | S2   |
| Computational Methods                             | S3   |
| Synthetic Schemes                                 | S4   |
| Characterization Data                             | S21  |
| Pharmacological Assays                            | S37  |
| TDO2 Expression, Purification and Crystallization | S49  |
| Small Molecule X-ray Crystallography              | S41  |
| References                                        | S121 |

## General Information

All solvents and commercial reagents were used as received unless otherwise stated. Where products were purified by chromatography on silica gel this was carried out using either a glass column manually packed with silica gel (Kieselgel 60, 220-440 mesh, 35-75  $\mu\text{m}$ ) or an Isolute SPE Si II cartridge. 'Isolute SPE Si cartridge' refers to a pre-packed polypropylene column containing unbonded activated silica with irregular particles with average size of 50  $\mu\text{m}$  and nominal 60 Å porosity. Where an Isolute® SCX2 cartridge was used, 'Isolute® SCX-2 cartridge' refers to a pre-packed polypropylene column containing a non-end-capped propylsulphonic acid functionalized silica strong cation exchange sorbent.  $^1\text{H}$  NMR spectra were obtained at ambient temperature, unless otherwise indicated, in deuterated  $\text{CDCl}_3$ ,  $\text{DMSO-}d_6$  or methanol- $d_4$  solvent solutions (reported in ppm) using trimethylsilane (TMS) or residual non-deuterated solvent peaks as the reference standard. When peak multiplicities are reported, the following abbreviates are used: app (apparent), s (singlet), d (doublet), t (triplet), q (quartet), m (multiplet), br (broad), dd (doublet of doublets), dt (doublet of triplets). Coupling constants, when determined, are reported in Hz (Hertz). LC-MS analysis was performed on a Shimadzu LCMS-202 instrument equipped with Waters Acquity BEH C18-reverse-phase column (50 mm  $\times$  2.1 mm  $\times$  1.7  $\mu\text{m}$ ), eluting with water (+ 0.1% formic acid, 0.05% trifluoroacetic acid or 0.1% ammonium hydroxide)–acetonitrile. Compounds **2**,<sup>1</sup> **7**,<sup>1</sup> **8**,<sup>2</sup> **9**,<sup>3</sup> **11–18**,<sup>3</sup> **20–24**,<sup>3</sup> **26–31**,<sup>3</sup> **38**,<sup>4</sup> **45**,<sup>5</sup> **52**<sup>1</sup> and **65**<sup>1</sup> were prepared according to published procedures.

## Computational Methods

The ability of each tricyclic core (*e.g.* **1–6**) to coordinate with a heme iron was estimated through a calculation of the partial charge of the iron-binding nitrogen using quantum mechanical calculations with Schrodinger's Jaguar<sup>6</sup> version 8.7 at a B3LYP/6-31G\*\* level of theory. Following a geometry optimization of each three-ring core, partial charges at the nitrogen atom were derived from the electrostatic potential.

## Synthetic Schemes

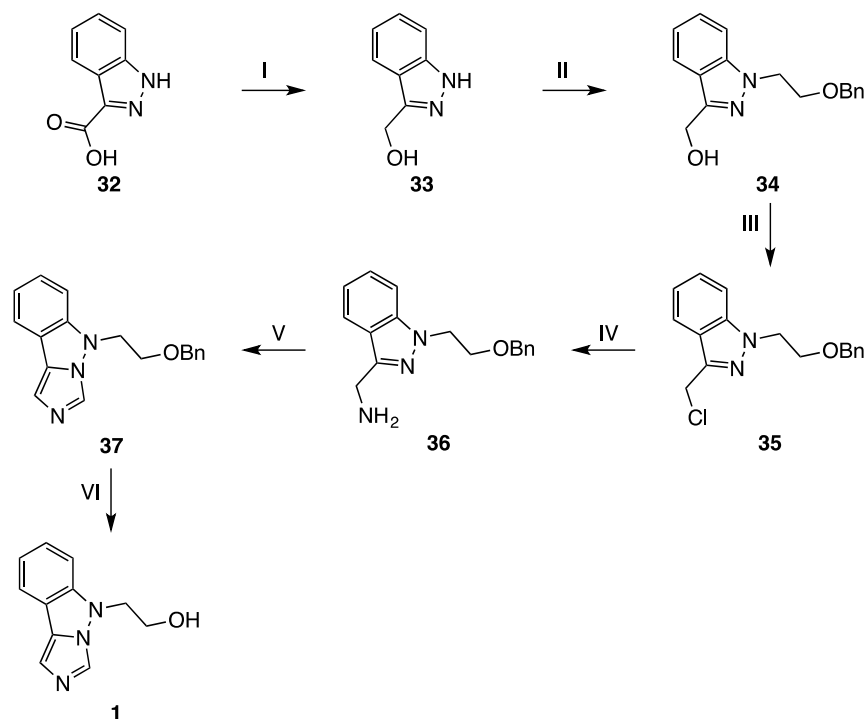

**Scheme S1.** Reagents and conditions: (I) lithium aluminum hydride, tetrahydrofuran, 25 °C; (II) ((2-bromoethoxy)methyl)benzene, potassium *tert*-butoxide, *N,N*-dimethylformamide, 25 °C; (III) thionyl chloride, toluene, 60 °C; (IV) ammonium hydroxide, *N,N*-dimethylformamide, 1,4-dioxane, 50 °C; (V) formic acid, acetic anhydride, 60 °C then phosphoryl chloride, toluene, 100 °C; (VI) palladium-on-carbon, hydrogen (1 atm), acetic acid, methanol, 25 °C.

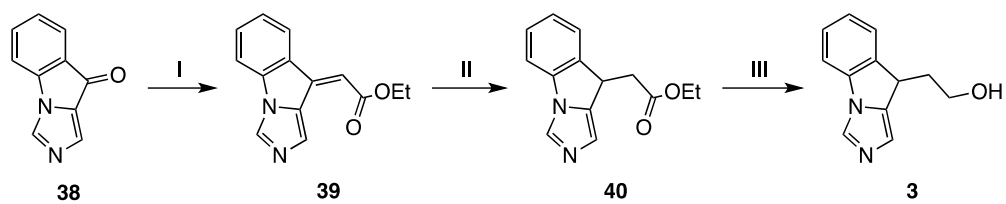

**Scheme S2.** Reagents and conditions: (I) ethyl 2-(diethoxyphosphoryl)acetate, sodium hydride, tetrahydrofuran, 0–25 °C; (II) palladium-on-carbon, hydrogen (10 atm), ethyl acetate, 25 °C; (III) lithium aluminum hydride, tetrahydrofuran, 0 °C.

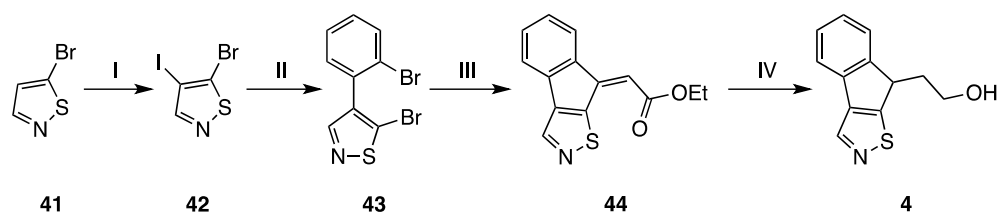

**Scheme S3.** Reagents and conditions: (I) *N*-iodosuccinimide, trifluoroacetic acid, 80 °C; (II) (2-bromophenyl)boronic acid, bis(triphenylphosphine)palladium(II) dichloride, sodium bicarbonate, 1,4-dioxane, water, 100 °C; (III) ethyl propenoate, palladium(II) acetate, tris(*o*-tolyl)phosphine, potassium acetate, *N,N*-dimethylformamide, 100 °C; (IV) sodium borohydride, methanol, 25 °C.

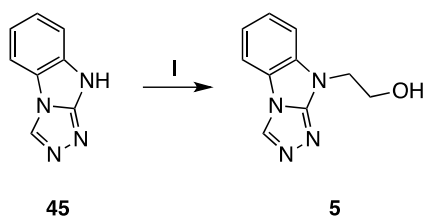

**Scheme S4.** Reagents and conditions: (I) 2-bromoethan-1-ol, potassium hydroxide, *N,N*-dimethylformamide, 25 °C.

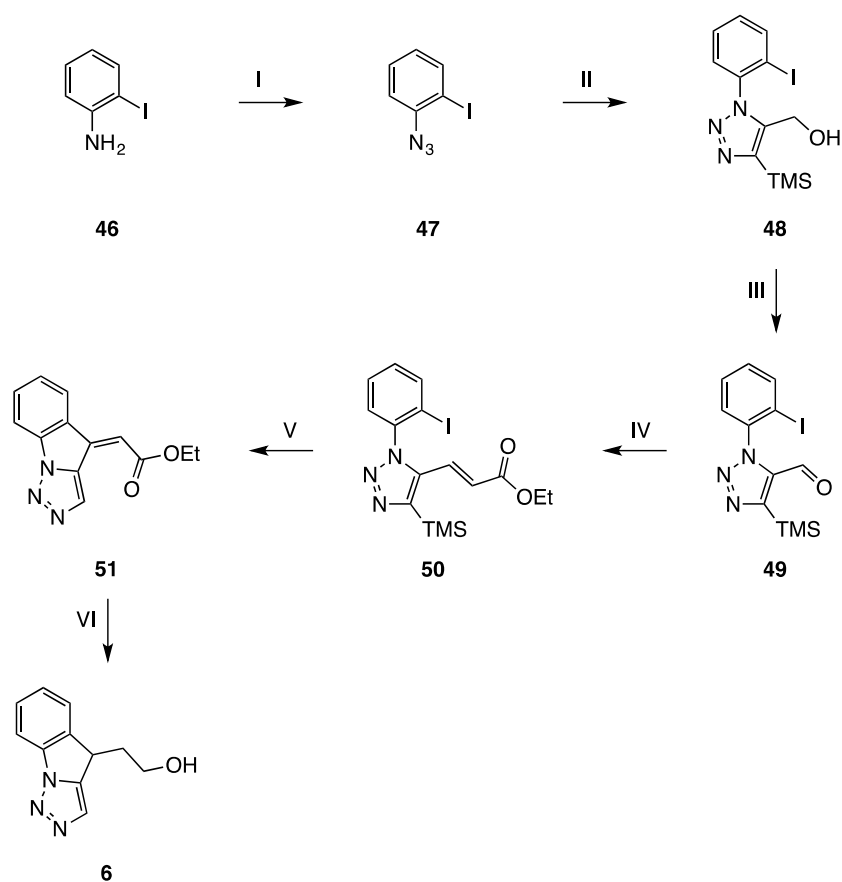

**Scheme S5.** Reagents and conditions: (I) sodium nitrate, sodium azide, hydrogen chloride, water, 0 °C; (II) 3-(trimethylsilyl)prop-2-yn-1-ol, toluene, 110 °C; (III) Dess-Martin periodinane, dichloromethane, 25 °C; (IV) ethyl (triphenylphosphoranylidene)acetate, tetrahydrofuran, 25 °C; (V) palladium(II) acetate, tris(*o*-tolyl)phosphine, potassium acetate, *N,N*-dimethylformamide, 100 °C; (VI) sodium borohydride, methanol, 25 °C.



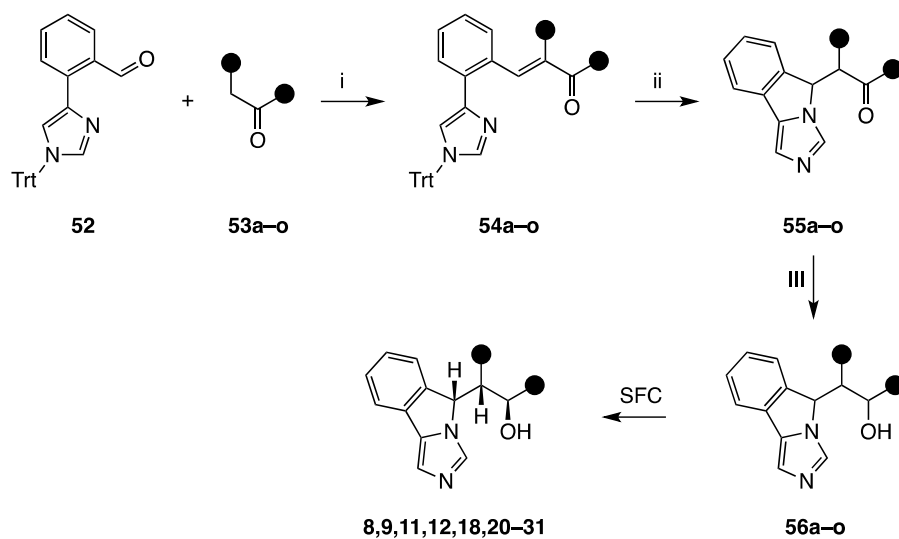

**Scheme S6.** Reagents and conditions: (I) See Table S1; (II) acetic acid, methanol, 70 °C; (III) sodium borohydride, methanol, 25 °C.

**Table S1.** Reaction conditions for Step I aldol condensation

| <b>Ketone 53</b>                                                                           | <b>Reagents &amp; Conditions</b>           |
|--------------------------------------------------------------------------------------------|--------------------------------------------|
| 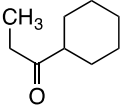<br>53a   | sodium hydroxide<br>ethanol, 50 °C         |
| <br>53b   | pyrrolidine<br>methanol, 50 °C             |
| <br>53c   | pyrrolidine<br>methanol, 50 °C             |
| <br>53d   | sodium hydroxide<br>ethanol, 50 °C         |
| <br>53e   | sodium methoxide<br>tetrahydrofuran, 50 °C |
| <br>53f | sodium hydroxide<br>tetrahydrofuran, 25 °C |
| <br>53g | sodium ethoxide<br>ethanol, 80 °C          |
| <br>53h | sodium hydroxide<br>tetrahydrofuran, 25 °C |
| <br>53i | sodium ethoxide<br>methanol, 70 °C         |
| <br>53j | sodium hydroxide<br>ethanol, 50 °C         |
| <br>53k | sodium hydroxide<br>ethanol, 50 °C         |

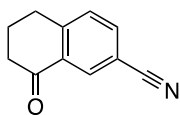

53l

sodium ethoxide  
methanol, 70 °C

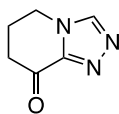

53m

lithium hydroxide  
tetrahydrofuran/water, 25 °C

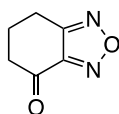

53n

pyrrolidine  
methanol, 70 °C

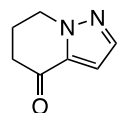

53o

sodium hydroxide  
ethanol, 50 °C

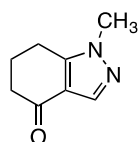

53p

sodium hydroxide  
ethanol, 50 °C

---

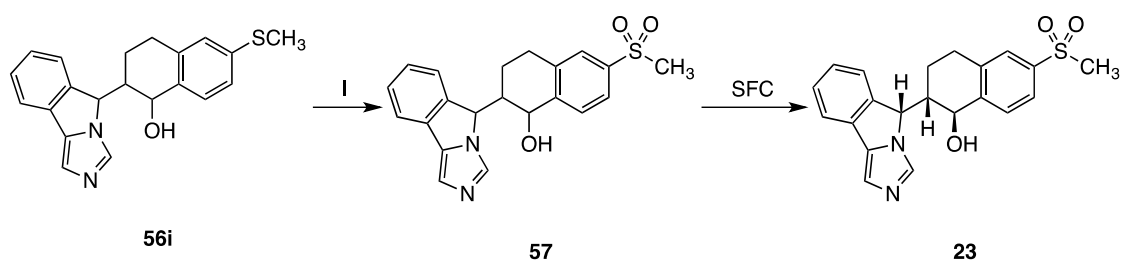

**Scheme S7.** Reagents and conditions: (I) hydrogen peroxide (30% aqueous solution), acetic acid, 25 °C.

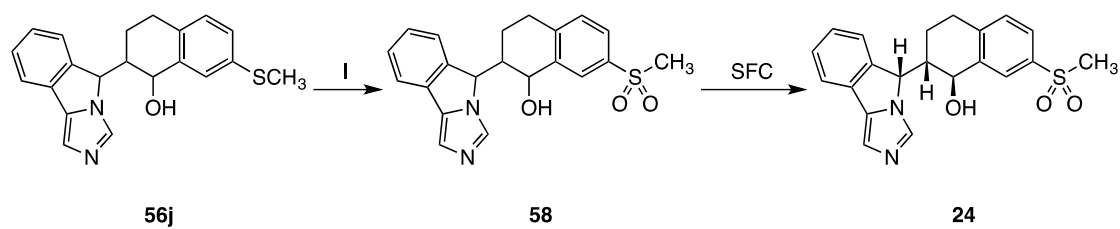

**Scheme S8.** Reagents and conditions: (I) hydrogen peroxide (30% aqueous solution), acetic acid, 25 °C.

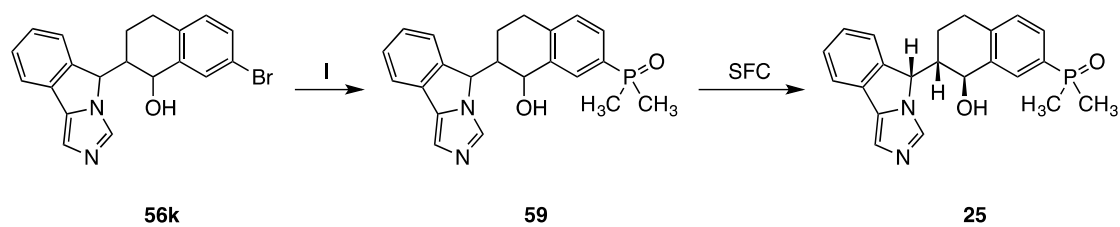

**Scheme S9.** Reagents and conditions: (I) dimethylphosphine oxide, palladium(II) acetate, 4,5-bis(diphenylphosphino)-9,9-dimethylxanthene, potassium phosphate, *N,N*-dimethylformamide, 140 °C.

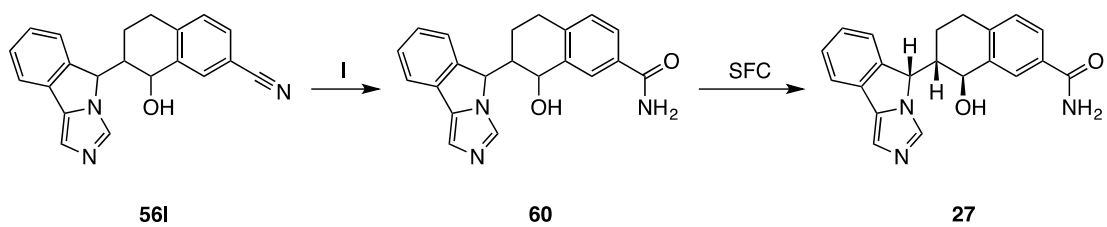

**Scheme S10.** Reagents and conditions: (I) sodium hydroxide, sodium peroxide (30% aqueous solution), methanol, 25 °C.

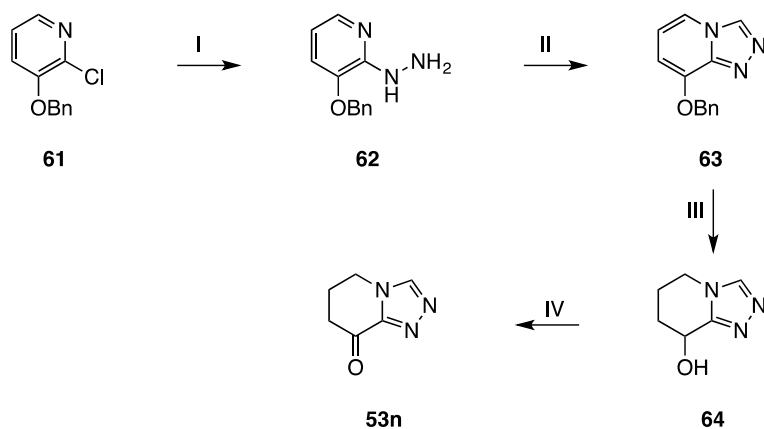

**Scheme S11.** Reagents and conditions: (I) hydrazine, potassium carbonate, isopropanol, 100 °C; (II) triethyl orthoformate, 160 °C; (III) palladium-on-carbon, hydrogen (1 atm), methanol, 25 °C; (IV) Dess-Martin periodinane, dichloromethane, 25 °C.



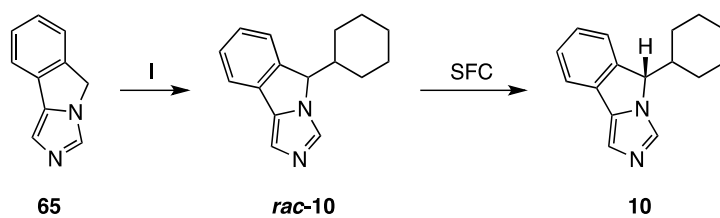

**Scheme S12.** Reagents and conditions: (I) *n*-butyllithium, bromocyclohexane, tetrahydrofuran, -78–25 °C.

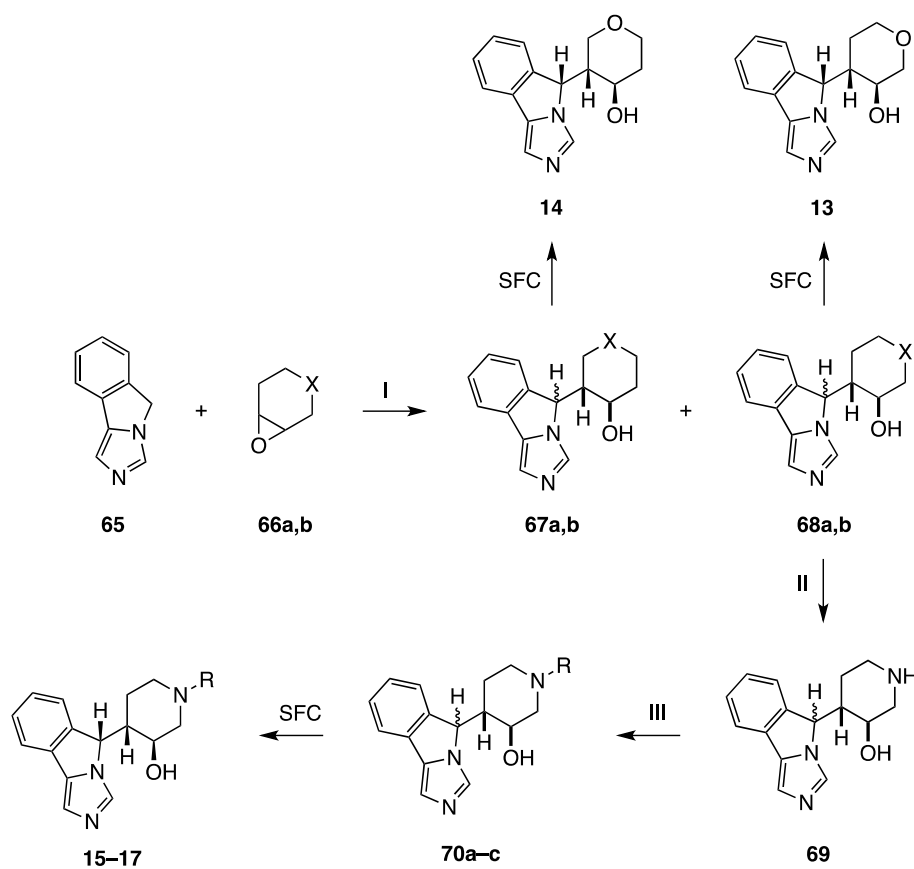

**Scheme S13.** Reagents and conditions: (I) **39a**, X = O, **39b**, X = *N*-Boc, *n*-butyllithium, tetrahydrofuran, -78–25 °C; (II) **68b**, trifluoroacetic acid, dichloromethane, 25 °C; (III) See Table S2.

**Table S2.** Reaction conditions for Step III *N*-substitution

| <i>N</i> -Substitution Product 70                                                        | Reagents & Conditions                                             |
|------------------------------------------------------------------------------------------|-------------------------------------------------------------------|
| 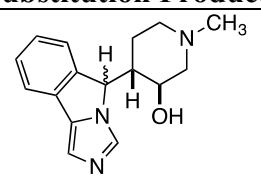<br>70a | formalin, sodium cyanoborohydride<br>acetic acid, water, 25 °C    |
| <br>70b | methanesulfonyl chloride, triethylamine<br>dichloromethane, 25 °C |
| <br>70c | acetyl chloride, triethylamine<br>dichloromethane, 25 °C          |

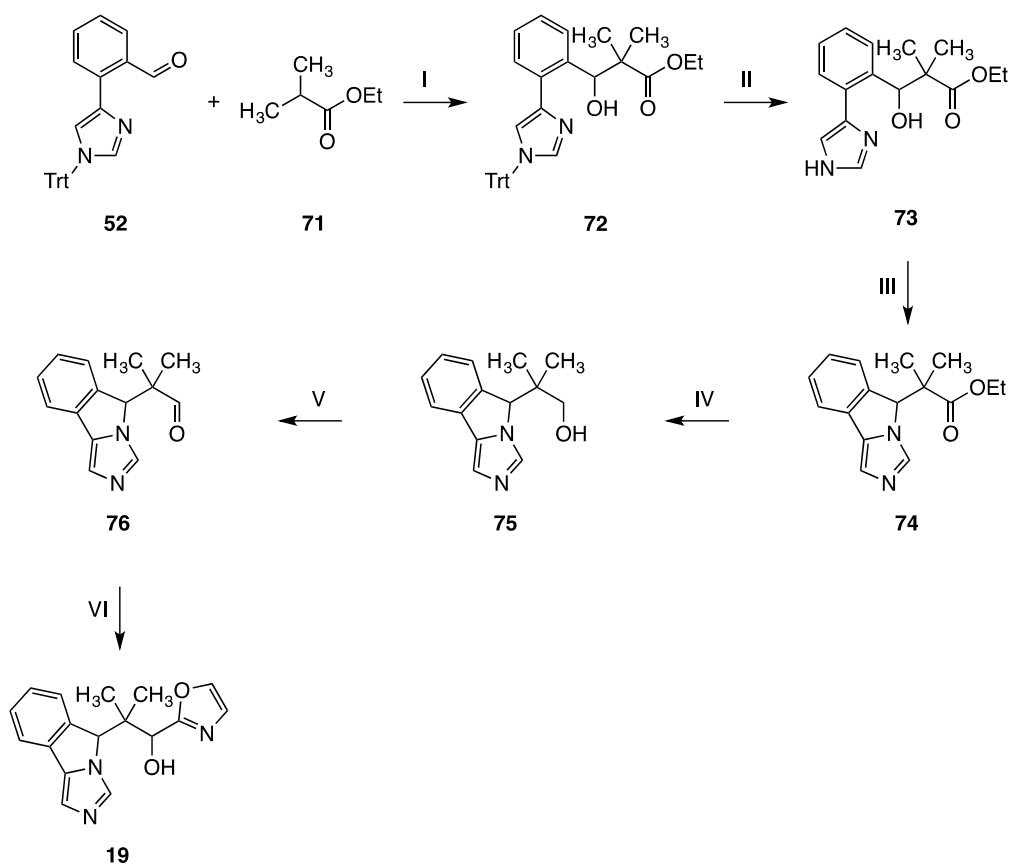

**Scheme S14.** Reagents and conditions: (I) *N,N*-diisopropylamine, *n*-butyllithium, tetrahydrofuran, -40 °C; (II) acetic acid, methanol, 70 °C; (III) cyanomethylene trimethylphosphorane, tetrahydrofuran, 25 °C; (IV) diisobutylaluminum hydride, toluene, 0–25 °C; (V) Dess-Martin periodinane, sodium bicarbonate, dichloromethane, 25 °C; (VI) oxazole, *n*-butyllithium, tetrahydrofuran, -78–25 °C.

## Characterization Data

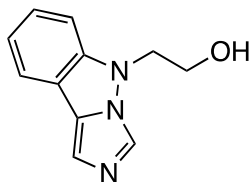

**2-(5H-imidazo[1,5-b]indazol-5-yl)ethan-1-ol (1).**

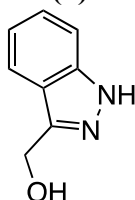

(1H-indazol-3-yl)methanol (**33**): To a solution of lithium aluminum hydride (4.7 g, 120 mmol) in tetrahydrofuran (500 mL) was added 1H-indazole-3-carboxylic acid (**32**, 10 g, 62 mmol). The resulting solution was stirred for 5 h at 0 °C. The reaction was then quenched with water and 15% sodium hydroxide. The solids were filtered out. The filtrate was concentrated under vacuum. Purification by silica gel flash chromatography eluting with 40% dichloromethane–ethyl acetate afforded the title compound (2.6 g, 28%) as a light yellow solid. LCMS-ESI (m/z): [M+H]<sup>+</sup> calcd for C<sub>8</sub>H<sub>9</sub>N<sub>2</sub>O, 149.2; found 149.3.

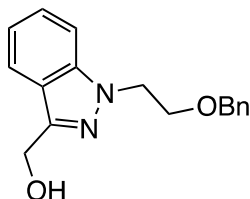

(1-(2-(benzyloxy)ethyl)-1H-indazol-3-yl)methanol (**34**): To a solution of 1H-indazol-3-ylmethanol (**33**, 2.6 g, 17.6 mmol) in *N,N*-dimethylformamide (120 mL) was added potassium *tert*-butoxide (3.94 g, 35 mmol) and ((2-bromoethoxy)methyl)benzene (5.67 g, 26 mmol). The resulting solution was stirred for 2 h at ambient temperature. The resulting solution was diluted with water and extracted with ethyl acetate. The organic layers were combined and concentrated under vacuum. Purification by silica gel flash chromatography eluting with 50% ethyl acetate–petroleum ether afforded the title compound (3.5 g, 71%) as a yellow oil. LCMS-ESI (m/z): [M+H]<sup>+</sup> calcd for C<sub>17</sub>H<sub>19</sub>N<sub>2</sub>O<sub>2</sub>, 283.3; found 283.1.

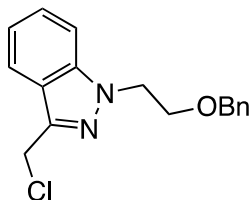

1-(2-(benzyloxy)ethyl)-3-(chloromethyl)-1H-indazole (**35**): To a solution of (1-(2-(benzyloxy)ethyl)-1H-indazol-3-yl)methanol (**34**, 2.5 g, 8.9 mmol) in toluene (20 mL) was added thionyl chloride (10 mL, 138 mmol). The resulting solution was stirred for 1.5 h at 65 °C in an oil bath. The resulting mixture was concentrated under vacuum to afford the title compound (2.5 g, crude) as a yellow oil. LCMS-ESI (m/z): [M+H]<sup>+</sup> calcd for C<sub>17</sub>H<sub>18</sub><sup>35</sup>ClN<sub>2</sub>O, 301.8; found 301.2.

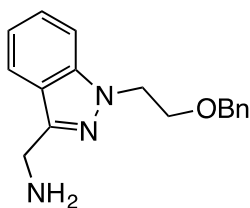

1-(2-(benzyloxy)ethyl)-1*H*-indazol-3-yl)methanamine (**36**): To ammonia (90 mL) was added a solution of 1-(2-(benzyloxy)ethyl)-3-(chloromethyl)-1*H*-indazole (**35**, 2.5 g, 8.3 mmol) in 1,4-dioxane (10 mL) and *N,N*-dimethylformamide (5 mL). The resulting solution was stirred for 2 h at 50 °C in an oil bath. The reaction mixture was concentrated under vacuum. Purification by silica gel flash chromatography eluting with 0.1% ammonia–10% dichloromethane–methanol afforded the title compound (1.3 g, 56%) as a yellow oil. LCMS-ESI (*m/z*): [*M*+*H*]<sup>+</sup> calcd for C<sub>17</sub>H<sub>20</sub>N<sub>3</sub>O, 282.4; found 282.2.

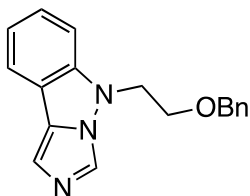

5-(2-(benzyloxy)ethyl)-5*H*-imidazo[1,5-*b*]indazole (**37**): A mixture of 1-(2-(benzyloxy)ethyl)-1*H*-indazol-3-yl)methanamine (**36**, 500 mg, 1.8 mmol) in acetic anhydride (10 mL) and formic acid (5 mL) was stirred for 2 h at 60 °C in an oil bath. The mixture was concentrated under vacuum, and resuspended in toluene (10 mL) and phosphorus oxychloride (3 mL). The resulting solution was stirred for 1 h at 100 °C in an oil bath. The reaction mixture was concentrated under vacuum. Purification by preparative HPLC afforded the title compound (85 mg, 16%) as a yellow oil. LCMS-ESI (*m/z*): [*M*+*H*]<sup>+</sup> calcd for C<sub>18</sub>H<sub>18</sub>N<sub>3</sub>O, 292.4; found 292.2.

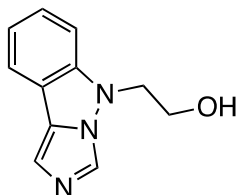

2-(5*H*-imidazo[1,5-*b*]indazol-5-yl)ethan-1-ol (**1**): 5-(2-(benzyloxy)ethyl)-5*H*-imidazo[1,5-*b*]indazole (**37**, 620 mg, 2.1 mmol), acetic acid (25 mg, 0.42 mmol) and 10% Pd/C (45 mg) were combined in methanol (25 mL) under an atmosphere of hydrogen and stirred for 2 h at ambient temperature. The solids were removed by filtration. The filtrate was concentrated under vacuum. Purification by preparative HPLC afforded the title compound (24 mg, 5%) as a pale yellow solid. LCMS-ESI (*m/z*): [*M*+*H*]<sup>+</sup> calcd for C<sub>11</sub>H<sub>12</sub>N<sub>3</sub>O, 202.2; found 202.1. <sup>1</sup>H NMR (400 MHz, DMSO-*d*<sub>6</sub>) δ 8.18 (s, 1H), 7.74 (d, *J* = 7.7 Hz, 1H), 7.43 (d, *J* = 8.2 Hz, 1H), 7.41 – 7.32 (m, 1H), 7.22 – 7.13 (m, 2H), 4.96 (t, *J* = 5.1 Hz, 1H), 4.21 (t, *J* = 5.4 Hz, 2H), 3.79 – 3.62 (m, 2H).

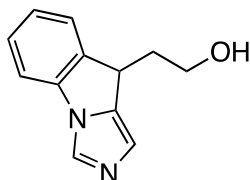

2-(9*H*-imidazo[1,5-*a*]indol-9-yl)ethan-1-ol (**3**).

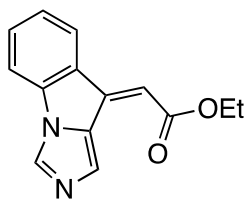

ethyl (*Z*)-2-(9*H*-imidazo[1,5-*a*]indol-9-ylidene)acetate (**39**): To a solution of ethyl 2-(diethoxyphosphoryl)acetate (263 mg, 1.2 mmol) in tetrahydrofuran (2 mL) was added sodium hydride (30 mg, 1.2 mmol) at 0 °C. After 5 min, a tetrahydrofuran (1 mL) solution of 9*H*-Imidazo[1,5-*a*]indol-9-one (**38**, 100 mg, 0.59 mmol) was added to the reaction vessel. The reaction was allowed to warm to ambient temperature for 1 h. The crude mixture was concentrated under vacuum. The residue was partitioned between ethyl acetate and water. The organic layer was washed with water and dried over anhydrous sodium sulfate. The solvent was removed under vacuum. Purification by silica gel flash chromatography eluting with 1–10% methanol–dichloromethane afforded the title compound (120 mg, 85%) as a yellow solid. LCMS-ESI (*m/z*): [*M*+*H*]<sup>+</sup> calcd for C<sub>14</sub>H<sub>13</sub>N<sub>2</sub>O<sub>2</sub>, 241.3; found 241.0.

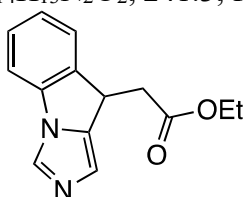

ethyl 2-(9*H*-imidazo[1,5-*a*]indol-9-yl)acetate (**40**): A suspension of ethyl (*Z*)-2-(9*H*-imidazo[1,5-*a*]indol-9-ylidene)acetate (**39**, 200 mg, 0.83 mmol) and palladium-on-carbon (100 mg) in ethyl acetate (4 mL) was stirred under hydrogen (10 atm) for 2 h at room temperature. The reaction mixture was filtered. The solvent was removed under vacuum to afford the title compound (175mg, 85%) as a pale yellow solid. LCMS-ESI (*m/z*): [*M*+*H*]<sup>+</sup> calcd for C<sub>14</sub>H<sub>15</sub>N<sub>2</sub>O<sub>2</sub>, 243.3; found 243.1.

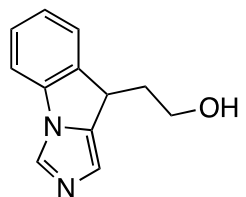

2-(9*H*-imidazo[1,5-*a*]indol-9-yl)ethan-1-ol (**3**): To a solution of ethyl 2-(9*H*-imidazo[1,5-*a*]indol-9-yl)acetate (**40**, 120 mg, 0.50 mmol) in tetrahydrofuran (5 mL) was added lithium aluminum hydride (56 mg, 1.5 mmol) at 0 °C. The resulting suspension was allowed to warm to ambient temperature for 2 h. The reaction was quenched with water and extracted with ethyl acetate. The organic layer was washed with water and dried over anhydrous sodium sulfate. The solvent was removed under vacuum. Purification by silica gel flash chromatography eluting with 1–10% methanol–dichloromethane afforded the title compound (6 mg, 4%) as a pale yellow solid. LCMS-ESI (*m/z*): [*M*+*H*]<sup>+</sup> calcd for C<sub>12</sub>H<sub>13</sub>N<sub>2</sub>O, 201.3; found 201.1. <sup>1</sup>H NMR (400 MHz, DMSO-*d*<sub>6</sub>) δ 8.22 (s, 1H), 7.68 (d, *J* = 7.8 Hz, 1H), 7.54 (dq, *J* = 7.5, 1.0 Hz, 1H), 7.39 (tt, *J* = 7.8, 1.0 Hz, 1H), 7.24 (td, *J* = 7.6, 1.1 Hz, 1H), 6.91 (d, *J* = 1.4 Hz, 1H), 4.62 (t, *J* = 5.1 Hz, 1H), 4.19 (dd, *J* = 9.8, 5.1 Hz, 1H), 3.66 (dt, *J* = 7.3, 5.7 Hz, 3H), 2.17 (dtd, *J* = 12.7, 7.4, 5.1 Hz, 1H), 1.60 (ddt, *J* = 13.3, 9.7, 5.8 Hz, 1H).

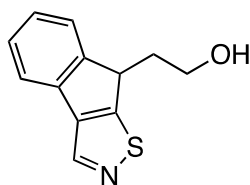

**2-(8*H*-indeno[1,2-*d*]isothiazol-8-yl)ethan-1-ol (4).**

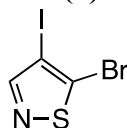

5-bromo-4-iodo-1,2-thiazole (**42**): To a solution of 5-bromo-1,2-thiazole (**41**, 500 mg, 3.0 mmol) in trifluoroacetic acid (50 mL) was added *N*-iodosuccinimide (1.6 g, 7.1 mmol). The resulting solution was stirred for 12 h at 80 °C. The reaction was quenched with water and extracted with ethyl acetate. The solvent was removed under vacuum. Purification by silica gel flash chromatography eluting with 5% ethyl acetate–petroleum ether afforded the title compound (600 mg, 68%) as a yellow solid. LCMS-ESI (m/z): [M+H]<sup>+</sup> calcd for C<sub>3</sub>H<sub>2</sub><sup>79</sup>BrINS, 289.9; found 289.8.

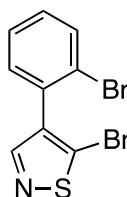

5-bromo-4-(2-bromophenyl)-1,2-thiazole (**43**): To a solution of 5-bromo-4-iodo-1,2-thiazole (**42**, 500 mg, 1.7 mmol) in dioxane (10 mL) and water (2 mL) was added (2-bromophenyl)boronic acid (345 mg, 1.7 mmol), bis(triphenylphosphine)palladium(II) dichloride (120 mg, 0.17 mmol) and sodium bicarbonate (540 mg, 6.4 mmol). The resulting solution was stirred for 15 min at 120 °C. The reaction mixture was concentrated under vacuum. Purification by silica gel flash chromatography eluting with 10% ethyl acetate–petroleum ether afforded the title compound (300 mg, 55%) as yellow oil. LCMS-ESI (m/z): [M+H]<sup>+</sup> calcd for C<sub>9</sub>H<sub>6</sub><sup>79</sup>Br<sub>2</sub>NS, 317.9; found 318.1.

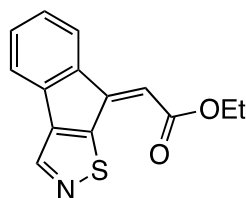

ethyl (*Z*)-2-(8*H*-indeno[1,2-*d*]isothiazol-8-ylidene)acetate (**44**): To a solution of 5-bromo-4-(2-bromophenyl)-1,2-thiazole (**43**, 500 mg, 1.6 mmol) in *N,N*-dimethylformamide (10 mL) was added ethyl prop-2-enoate (1.0 g, 10 mmol), palladium(II) acetate (20 mg, 0.09 mmol), potassium acetate (387 mg, 15 mmol) and tris(*o*-tolyl)phosphine (20 mg, 0.07 mmol). The resulting solution was stirred for 12 h at 100 °C. The reaction was quenched with water and extracted with ethyl acetate. The solvent was removed under vacuum. Purification by silica gel flash chromatography eluting with 10% ethyl acetate–petroleum ether afforded the title compound (150 mg, 40%) as yellow oil. LCMS-ESI (m/z): [M+H]<sup>+</sup> calcd for C<sub>14</sub>H<sub>12</sub>NO<sub>2</sub>S, 258.1; found 258.1.



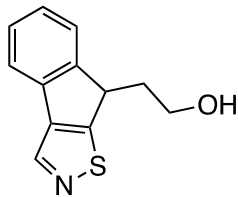

2-(8*H*-indeno[1,2-*d*]isothiazol-8-yl)ethan-1-ol (**4**): To a solution of ethyl (*Z*)-2-(8*H*-indeno[1,2-*d*]isothiazol-8-ylidene)acetate (**44**, 300 mg, 1.2 mmol) in methanol (20 mL) was added sodium borohydride (1.2 g, 32 mmol). The resulting solution was stirred for 3 h at ambient temperature. The reaction was then quenched with water and extracted with ethyl acetate. The organic layers were combined and concentrated under vacuum. Purification by silica gel flash chromatography eluting with 50% ethyl acetate–petroleum ether afforded the title compound (25 mg, 10%) as yellow oil. LCMS-ESI (*m/z*): [*M*+*H*]<sup>+</sup> calcd for C<sub>12</sub>H<sub>12</sub>NOS, 218.1; found 218.1. <sup>1</sup>H NMR (300 MHz, DMSO-*d*<sub>6</sub>) δ 8.87 (s, 1H), 7.73 (d, *J* = 7.4 Hz, 1H), 7.57 (d, *J* = 7.5 Hz, 1H), 7.36 (t, *J* = 7.4 Hz, 1H), 7.31 – 7.24 (m, 1H), 4.99 (t, *J* = 4.8 Hz, 1H), 4.25 (dd, *J* = 10.5, 4.2 Hz, 1H), 3.81 – 3.68 (m, 2H), 2.44 – 2.27 (m, 1H), 1.63 – 1.43 (m, 1H).

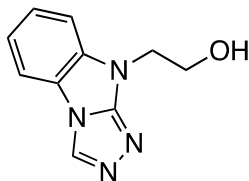

2-(9*H*-benzo[4,5]imidazo[2,1-*c*][1,2,4]triazol-9-yl)ethan-1-ol (**5**). To a solution of 9*H*-benzo[4,5]imidazo[2,1-*c*][1,2,4]triazole (**45**, 54 mg, 0.34 mmol) in *N,N*-dimethylformamide (1 mL) was added cesium carbonate (156 mg, 0.48 mmol) and 2-bromoethanol (0.060 mL, 0.80 mmol). The resulting suspension was stirred for 4 d at ambient temperature. The mixture was diluted with ethyl acetate and filtered. The solvent was removed under vacuum. Purification by reverse phase HPLC on C18 with water (0.1% ammonium hydroxide)–acetonitrile afforded the title compound (2 mg, 3%) as a tan solid. LCMS-ESI (*m/z*): [*M*+*H*]<sup>+</sup> calcd for C<sub>10</sub>H<sub>11</sub>N<sub>4</sub>O, 203.1; found 203.1. <sup>1</sup>H NMR (400 MHz, DMSO-*d*<sub>6</sub>) δ 8.99 (s, 1H), 7.87 (d, *J* = 7.9 Hz, 1H), 7.57 (d, *J* = 8.2 Hz, 1H), 7.39 (ddd, *J* = 8.3, 7.4, 1.2 Hz, 1H), 7.23 (app td, *J* = 7.8, 1.1 Hz, 1H), 4.85 (t, *J* = 5.6 Hz, 1H), 4.22 (t, *J* = 5.5 Hz, 2H), 3.87 (app q, *J* = 5.5 Hz, 2H).

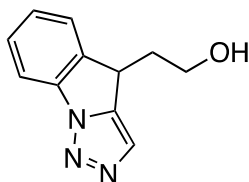

2-(4*H*-[1,2,3]triazolo[1,5-*a*]indol-4-yl)ethan-1-ol (**6**).

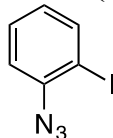

1-azido-2-iodobenzene (**47**): To a solution of 2-iodoaniline (**46**, 1.0 g, 4.6 mmol) in aqueous hydrogen chloride (6 N) was added a solution of sodium nitrite (380 mg, 5.5 mmol) in water (5 mL). The resulting solution was stirred for 40 min at 0 °C. Then a solution of sodium azide (590 mg, 9.1 mmol) in water (5 mL) was added. The resulting solution was stirred for 1.5 h at 0 °C.

The aqueous solution was extracted with ethyl acetate and the organic layers were combined. The organic layer was concentrated under vacuum to afford the title compound (569 mg, 51%) as a brown oil. LCMS-ESI (m/z):  $[M+H]^+$  calcd for  $C_6H_5IN_3$ , 246.0; found 246.1.  $^1H$  NMR (300 MHz,  $DMSO-d_6$ )  $\delta$  7.85 – 7.82 (m, 1H), 7.57 – 7.46 (m, 1H), 7.45 – 7.33 (m, 1H), 6.98 – 6.95 (m, 1H).

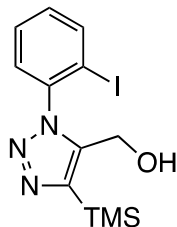

(1-(2-iodophenyl)-4-(trimethylsilyl)-1*H*-1,2,3-triazol-5-yl)methanol (**48**): To a solution of 1-azido-2-iodobenzene (**47**, 5.0 g, 20 mmol) in toluene (150 mL) was added 3-(trimethylsilyl)prop-2-yn-1-ol (5.0 g, 39 mmol). The resulting solution was stirred for 24 h at 120 °C in an oil bath. The reaction mixture was concentrated under vacuum. Purification by silica gel flashed column eluting with 50% ethyl acetate–petroleum ether afforded the title compound (3.0 g, 39%) as a pale yellow solid. LCMS-ESI (m/z):  $[M+H]^+$  calcd for  $C_{12}H_{17}IN_3OSi$ , 374.0; found 374.0.

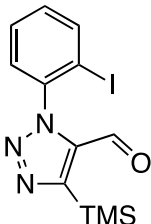

1-(2-iodophenyl)-4-(trimethylsilyl)-1*H*-1,2,3-triazole-5-carbaldehyde (**49**): To a solution of (1-(2-iodophenyl)-4-(trimethylsilyl)-1*H*-1,2,3-triazol-5-yl)methanol (**48**, 2.0 g, 5.4 mmol) in dichloromethane (100 mL) was added (1,1,1-triacetoxy)-1,1-dihydro-1,2-benziodoxol-3(1*H*)-one (4.5 g, 11 mmol). The resulting solution was stirred for 3 h at ambient temperature. The resulting solution was diluted with ethyl acetate. The solids were removed by filtration. The resulting mixture was concentrated under vacuum to afford the title compound (2.5 g, crude) as a pale red solid. LCMS-ESI (m/z):  $[M+H]^+$  calcd for  $C_{12}H_{15}IN_3OSi$ , 372.0; found 372.1.

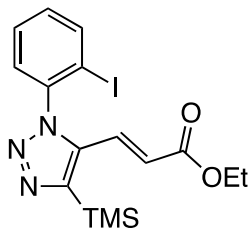

ethyl (2*E*)-3-[1-(2-iodophenyl)-4-(trimethylsilyl)-1*H*-1,2,3-triazol-5-yl]prop-2-enoate (**50**): To a solution of 1-(2-iodophenyl)-4-(trimethylsilyl)-1*H*-1,2,3-triazole-5-carbaldehyde (**49**, 2.5 g, 6.7 mmol) in tetrahydrofuran (150 mL) was added ethyl 2-(triphenylphosphoranylidene)acetate (2.3 g, 6.6 mmol). The resulting solution was stirred for 3 h at ambient. The solids were removed by filtration. The filtrate was concentrated under vacuum. Purification by silica gel flash chromatography eluting with 20% ethyl acetate–petroleum ether afforded the title compound (1.4 g, 47%) as a pale yellow solid. LCMS-ESI (m/z):  $[M+H]^+$  calcd for  $C_{16}H_{21}IN_3O_2Si$ , 442.0; found 442.1.

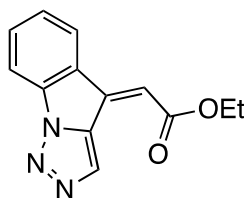

ethyl (*Z*)-2-(4*H*-[1,2,3]triazolo[1,5-*a*]indol-4-ylidene)acetate (**51**): To a solution of ethyl (*E*)-3-[1-(2-iodophenyl)-4-(trimethylsilyl)-1*H*-1,2,3-triazol-5-yl]prop-2-enoate (**50**, 300 mg, 0.68 mmol) in *N,N*-dimethylformamide (15 mL) was added palladium(II) acetate (30 mg, 0.13 mmol), tri(2-methylphenyl)phosphine (50 mg, 0.16 mmol) and potassium acetate (200 mg, 2.0 mmol). The resulting solution was stirred for 3 h at 100 °C in an oil bath. The reaction mixture was concentrated under vacuum. Purification by silica gel flash chromatography eluting with 25% ethyl acetate–petroleum ether afforded the title compound (135 mg, 82%) as a yellow solid. LCMS-ESI (*m/z*): [*M*+*H*]<sup>+</sup> calcd for C<sub>13</sub>H<sub>12</sub>N<sub>3</sub>O<sub>2</sub>, 242.1; found 242.2.

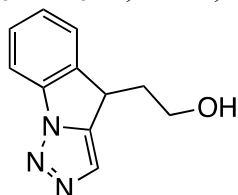

2-[4*H*-[1,2,3]triazolo[1,5-*a*]indol-4-yl]ethan-1-ol (**6**): To a solution of ethyl 2-[(4*Z*)-4*H*-[1,2,3]triazolo[1,5-*a*]indol-4-ylidene]acetate (**51**, 200 mg, 0.83 mmol) in methanol (20 mL) was added sodium borohydride (1.5 g, 40 mmol). The resulting solution was stirred for 2 h at ambient temperature. The reaction was then quenched by the addition of water. The resulting mixture was extracted with ethyl acetate and the organic layers were combined. The organic solution was concentrated under vacuum. Purification by silica gel flash chromatography eluting with 50% dichloromethane–ethyl acetate afforded the title compound (30 mg, 18%) as a yellow solid. LCMS-ESI (*m/z*): [*M*+*H*]<sup>+</sup> calcd for C<sub>11</sub>H<sub>12</sub>N<sub>3</sub>O, 202.1; found 202.1. <sup>1</sup>H NMR (300 MHz, DMSO-*d*<sub>6</sub>) δ 7.91 – 7.83 (m, 2H), 7.72 (d, *J* = 7.5 Hz, 1H), 7.53 (t, *J* = 7.6 Hz, 1H), 7.48 – 7.39 (m, 1H), 4.83 (t, *J* = 5.1 Hz, 1H), 4.37 (dd, *J* = 10.0, 5.0 Hz, 1H), 3.79 – 3.47 (m, 2H), 2.39 – 2.15 (m, 1H), 1.74 – 1.50 (m, 1H).

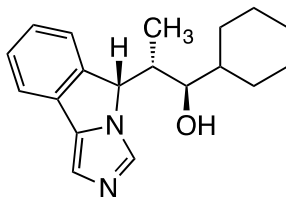

**(1*R*,2*S*)-1-cyclohexyl-2-((*S*)-5*H*-imidazo[5,1-*a*]isoindol-5-yl)propan-1-ol (**8**)**. LCMS-ESI (*m/z*): [*M*+*H*]<sup>+</sup> calcd for C<sub>19</sub>H<sub>25</sub>N<sub>2</sub>O, 297.2; found 297.1. <sup>1</sup>H NMR (300 MHz, methanol-*d*<sub>4</sub>) δ 9.15 (s, 1H), 7.86 (d, *J* = 7.2 Hz, 1H), 7.80 – 7.64 (m, 2H), 7.59 – 7.46 (m, 2H), 6.12 (s, 1H), 3.66 (d, *J* = 10.3 Hz, 1H), 2.71 (d, *J* = 6.4 Hz, 1H), 1.94 – 1.44 (m, 7H), 1.39 – 1.11 (m, 5H), 0.28 (d, *J* = 6.8 Hz, 3H). Chiral HPLC: *t*<sub>R</sub> = 7.412 min, Chiral ADH, 15% hexanes (0.1% diethanolamine)–isopropyl acetate.

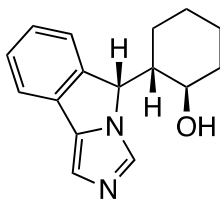

**(1R,2S)-2-((S)-5H-imidazo[5,1-a]isoindol-5-yl)cyclohexan-1-ol (9).** LCMS-ESI (m/z): [M+H]<sup>+</sup> calcd for C<sub>16</sub>H<sub>19</sub>N<sub>2</sub>O, 255.2; found 255.1. <sup>1</sup>H NMR (400 MHz, DMSO-*d*<sub>6</sub>) δ 7.88 (s, 1H), 7.66 (d, *J* = 7.5 Hz, 1H), 7.58 (d, *J* = 7.5 Hz, 1H), 7.40 – 7.32 (m, 1H), 7.27 – 7.18 (m, 1H), 7.10 (s, 1H), 5.16 (d, *J* = 5.4 Hz, 1H), 4.69 (d, *J* = 4.0 Hz, 1H), 4.09 – 4.04 (m, 1H), 1.82 – 1.30 (m, 7H), 1.18 – 1.10 (m, 1H). Chiral SFC: *t*<sub>R</sub> = 1.739 min, Chiral Art, 10% methanol (0.1% ammonium hydroxide)–carbon dioxide.

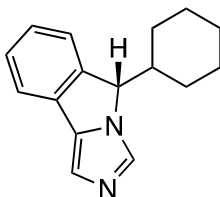

**(S)-5-cyclohexyl-5H-imidazo[5,1-a]isoindole (10).** To a solution of 5H-imidazo[5,1-a]isoindole (**65**, 502 mg, 3.2 mmol) in tetrahydrofuran (21 mL) at –78 °C was added *s*-butyllithium (1.4 M in cyclohexane, 2.5 mL, 3.5 mmol) over 5 min. The solution was stirred for 1 h at –78 °C. A solution of bromocyclohexane (524 mg, 3.2 mmol) in tetrahydrofuran (3 mL) was added down the side of the flask. The reaction was stirred for 1 h at –78 °C and allowed to warm to ambient temperature for 2 h. The reaction was quenched by addition of saturated aqueous ammonium chloride solution. The biphasic mixture was extracted with dichloromethane. The organic layer was dried over anhydrous sodium sulfate. The solvent was removed under vacuum. Purification by silica gel flash chromatography with 0–5% methanol–dichloromethane afforded the title compound as a tan solid (306 mg, 49%). LCMS-ESI (m/z): [M+H]<sup>+</sup> calcd for C<sub>16</sub>H<sub>19</sub>N<sub>2</sub>, 239.2; found 239.1. <sup>1</sup>H NMR (400 MHz, DMSO-*d*<sub>6</sub>) δ 7.88 (s, 1H), 7.58 (d, *J* = 7.4 Hz, 1H), 7.49 (dd, *J* = 7.7, 1.1 Hz, 1H), 7.37 (td, *J* = 7.4, 1.4 Hz, 1H), 7.27 (td, *J* = 7.5, 1.2 Hz, 1H), 7.12 (s, 1H), 5.25 (d, *J* = 2.8 Hz, 1H), 2.12 (tdd, *J* = 15.3, 7.7, 4.7 Hz, 1H), 1.71 (dq, *J* = 12.0, 2.8 Hz, 1H), 1.58 (td, *J* = 11.2, 4.9 Hz, 2H), 1.34 – 0.93 (m, 3H), 0.66 (qd, *J* = 12.3, 3.3 Hz, 1H). Chiral SFC: *t*<sub>R</sub> = 1.154 min, Trefoil Amy-1, 10% methanol (0.1% ammonium hydroxide)–carbon dioxide.

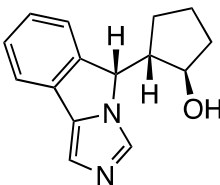

**(1R,2S)-2-((S)-5H-imidazo[5,1-a]isoindol-5-yl)cyclopentan-1-ol (11).** LCMS-ESI (m/z): [M+H]<sup>+</sup> calcd for C<sub>15</sub>H<sub>17</sub>N<sub>2</sub>O, 241.1; found 241.1. <sup>1</sup>H NMR (400 MHz, DMSO-*d*<sub>6</sub>) δ 7.90 (s, 1H), 7.61 (dd, *J* = 22.5, 7.6 Hz, 2H), 7.37 (t, *J* = 7.5 Hz, 1H), 7.31 – 7.23 (m, 1H), 5.39 (d, *J* = 6.8 Hz, 1H), 5.16 (d, *J* = 3.8 Hz, 1H), 4.37 (q, *J* = 4.7 Hz, 1H), 2.14 – 2.01 (m, 1H), 1.84 – 1.39 (m, 7H). Chiral SFC: *t*<sub>R</sub> = 0.458 min, Chiralpak AD, 20% methanol (0.1% ammonium hydroxide)–carbon dioxide.

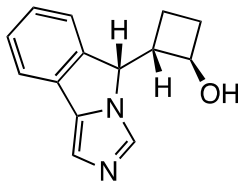

**(1R,2S)-2-((S)-5H-imidazo[5,1-a]isoindol-5-yl)cyclobutan-1-ol (12).** LCMS-ESI (m/z): [M+H]<sup>+</sup> calcd for C<sub>14</sub>H<sub>15</sub>N<sub>2</sub>O, 227.1; found 227.1. <sup>1</sup>H NMR (400 MHz, DMSO-*d*<sub>6</sub>) δ 7.84 (s, 1H), 7.61 – 7.54 (m, 2H), 7.36 (t, *J* = 7.6 Hz, 1H), 7.31 – 7.21 (m, 1H), 7.13 (s, 1H), 5.34 (dd, *J* = 15.4, 6.8 Hz, 2H), 4.25 (p, *J* = 7.5 Hz, 1H), 3.39 – 3.30 (m, 1H), 2.41 (dq, *J* = 9.6, 7.7 Hz, 1H), 2.15 – 2.03 (m, 1H), 1.73 – 1.50 (m, 2H), 1.12 (qd, *J* = 10.2, 8.1 Hz, 1H). Chiral SFC: t<sub>R</sub> = 0.627 min, Chiralpak AD, 20% methanol (0.1% ammonium hydroxide)–carbon dioxide.

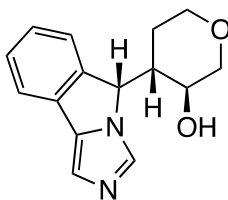

**(3S,4S)-4-((S)-5H-imidazo[5,1-a]isoindol-5-yl)tetrahydro-2H-pyran-3-ol (13).** LCMS-ESI (m/z): [M+H]<sup>+</sup> calcd for C<sub>15</sub>H<sub>17</sub>N<sub>2</sub>O<sub>2</sub>, 257.1; found 257.1. <sup>1</sup>H NMR (300 MHz, CDCl<sub>3</sub>) δ 8.02 (s, 1H), 7.55 – 7.53 (m, 1H), 7.40 – 7.28 (m, 3H), 7.20 (s, 1H), 5.85 (d, *J* = 2.1 Hz, 1H), 4.16 – 4.11 (m, 1H), 4.07 – 3.97 (m, 1H), 3.75 – 3.69 (m, 1H), 3.27 – 3.12 (m, 2H), 2.40 – 2.30 (m, 1H), 0.92 – 0.72 (m, 2H). Chiral HPLC: t<sub>R</sub> = 3.201 min, Chiralcel OJ-3, 85% hexanes (0.1% diethanolamine)–ethanol.

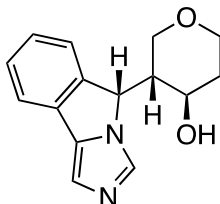

**(3R,4R)-3-((S)-5H-imidazo[5,1-a]isoindol-5-yl)tetrahydro-2H-pyran-4-ol (14).** LCMS-ESI (m/z): [M+H]<sup>+</sup> calcd for C<sub>15</sub>H<sub>17</sub>N<sub>2</sub>O<sub>2</sub>, 257.1; found 257.1. <sup>1</sup>H NMR (300 MHz, CDCl<sub>3</sub>): δ 7.80 (s, 1H), 7.53 – 7.50 (m, 1H), 7.39 – 7.24 (m, 3H), 7.17 (s, 1H), 5.82 (d, *J* = 2.1 Hz, 1H), 4.14 – 4.06 (m, 1H), 3.94 – 3.89 (m, 1H), 3.31 – 3.21 (m, 2H), 2.57 – 2.49 (m, 1H), 2.42 – 2.33 (m, 1H), 2.11 – 2.05 (m, 1H), 1.90 – 1.77 (m, 1H). Chiral HPLC: t<sub>R</sub> = 4.958 min, Chiralpak OJ-3, 85% hexanes (0.1% diethanolamine)–ethanol.

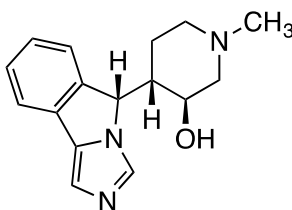

**(3S,4S)-4-((S)-5H-imidazo[5,1-a]isoindol-5-yl)-1-methylpiperidin-3-ol (15).** LCMS-ESI (m/z): [M+H]<sup>+</sup> calcd for C<sub>16</sub>H<sub>20</sub>N<sub>3</sub>O, 270.2; found 270.1. <sup>1</sup>H NMR (300 MHz, CD<sub>3</sub>OD): δ 7.92 (s, 1H), 7.63 (d, *J* = 7.5 Hz, 1H), 7.47 (d, *J* = 7.5 Hz, 1H), 7.42 – 7.33 (m, 2H), 7.19 (s, 1H), 5.80 (d, *J* = 3.3 Hz, 1H), 3.97 – 3.90 (m, 1H), 3.18 – 3.13 (m, 1H), 2.70 – 2.62 (m, 1H), 2.63 (s, 3H),

2.06 – 1.83 (m, 3H), 0.91 – 0.86 (m, 1H), 0.72 – 0.64 (m, 1H). ). Chiral HPLC:  $t_R = 5.153$  min, Chiralpak AD-H, 60% hexanes (0.1% diethanolamine)–ethanol.

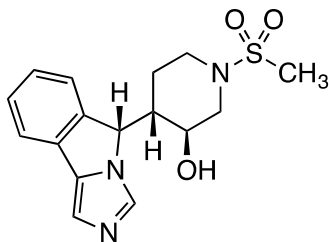

**(3*S*,4*S*)-4-((*S*)-5*H*-imidazo[5,1-*a*]isoindol-5-yl)-1-(methylsulfonyl)piperidin-3-ol (16).** LCMS-ESI (m/z):  $[M+H]^+$  calcd for  $C_{16}H_{20}N_3O_3S$ , 334.1; found 334.1.  $^1H$  NMR (300 MHz, DMSO- $d_6$ ):  $\delta$  7.92 (s, 1H), 7.63 (d,  $J = 7.8$  Hz, 1H), 7.52 (d,  $J = 7.8$  Hz, 1H), 7.44 – 7.27 (m, 2H), 7.15 (s, 1H), 5.81 (d,  $J = 3.6$  Hz, 1H), 5.79 (d,  $J = 3.6$  Hz, 1H), 3.84 – 3.71 (m, 2H), 3.34 – 3.29 (m, 1H), 2.84 (s, 3H), 2.55 – 2.51 (m, 1H), 2.49 – 2.48 (m, 2H), 2.34 – 2.21 (m, 1H), 0.71 – 0.66 (m, 1H), 0.55 – 0.54 (m, 1H). Chiral HPLC:  $t_R = 2.022$  min, Chiralpak IC-3, 50% hexanes (0.1% diethanolamine)–ethanol.

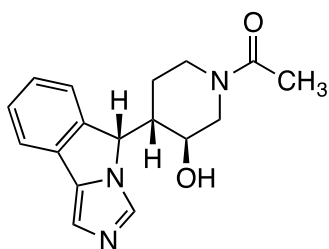

**1-((3*S*,4*S*)-3-hydroxy-4-((*S*)-5*H*-imidazo[5,1-*a*]isoindol-5-yl)piperidin-1-yl)ethan-1-one (17).** LCMS-ESI (m/z):  $[M+H]^+$  calcd for  $C_{17}H_{20}N_3O_2$ , 298.2; found 298.2.  $^1H$  NMR (300 MHz,  $CD_3OD$ ):  $\delta$  7.95 – 7.90 (m, 1H), 7.64 – 7.62 (m, 1H), 7.52 – 7.36 (m, 3H), 7.20 (s, 1H), 5.84 – 5.83 (m, 1H), 4.88 – 4.78 (m, 1H), 4.34 – 4.08 (m, 1H), 3.83 – 3.67 (m, 2H), 3.06 – 2.85 (m, 1H), 2.55 – 2.28 (m, 2H), 2.14 – 1.98 (m, 3H), 1.00 – 0.85 (m, 1H), 0.59 – 0.58 (m, 1H). Chiral HPLC:  $t_R = 10.807$  min, Chiralpak OD-3, 93% hexanes (0.1% diethanolamine)–ethanol.

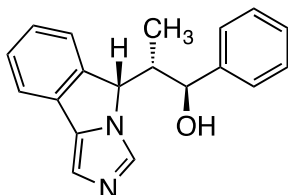

**(1*S*,2*S*)-2-((*S*)-5*H*-imidazo[5,1-*a*]isoindol-5-yl)-1-phenylpropan-1-ol (18).** LCMS-ESI (m/z):  $[M+H]^+$  calcd for  $C_{19}H_{19}N_2O$ , 291.2; found 291.1.  $^1H$  NMR (DMSO- $d_6$ ):  $\delta$  7.74 (s, 1H), 7.61 – 7.46 (m, 4H), 7.38 (dt,  $J = 15.0, 7.5$  Hz, 3H), 7.33 – 7.21 (m, 2H), 7.10 (s, 1H), 5.69 (d,  $J = 4.3$  Hz, 1H), 5.20 (s, 1H), 5.02 (t,  $J = 4.9$  Hz, 1H), 2.57 (ddd,  $J = 7.2, 5.6, 1.7$  Hz, 1H), 0.30 (d,  $J = 6.9$  Hz, 3H). Chiral SFC:  $t_R = 3.167$  min, Trefoil Cel-1, 22% methanol (0.1% ammonium hydroxide)–carbon dioxide.

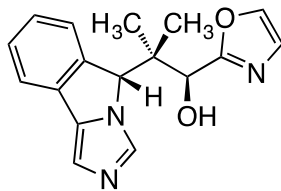

**(S)-2-((R)-5H-imidazo[5,1-a]isoindol-5-yl)-2-methyl-1-(oxazol-2-yl)propan-1-ol (19).**

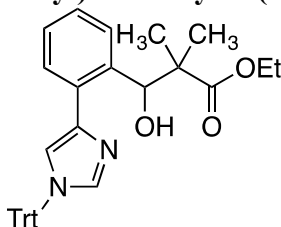

ethyl 3-hydroxy-2,2-dimethyl-3-(2-(1-trityl-1H-imidazol-4-yl)phenyl)propanoate (**72**): A solution of *n*-butyllithium (2.5 M, 2.3 mL, 5.8 mmol) in hexanes was added to a stirred solution of *N,N*-diisopropylamine (0.88 mL, 6.3 mmol) in tetrahydrofuran (20 mL) at 0 °C. The mixture was stirred for 20 min at 0 °C. A solution of ethyl 2-methylpropanoate (0.78 mL, 5.8 mmol) in tetrahydrofuran (2 mL) was added to the reaction vessel at -78 °C. The mixture was stirred for 40 min at -78 °C. A solution of 2-(1-trityl-1H-imidazol-4-yl)benzaldehyde (**52**, 1.00 g, 2.4 mmol) in tetrahydrofuran (7 mL) was added to the reaction vessel at -40 °C. The mixture was stirred for 1 h at -40 °C. The reaction was quenched by addition of saturated aqueous ammonium chloride solution. The quenched mixture was partitioned between water and ethyl acetate. The organic layer was washed with water and dried over anhydrous sodium sulfate. Purification by silica gel flash chromatography with 25–50% ethyl acetate–heptane afforded the title compound (1.1 g, 86%) as a yellow solid. LCMS-ESI (*m/z*):  $[M+H]^+$  calcd for C<sub>35</sub>H<sub>35</sub>N<sub>2</sub>O<sub>3</sub>, 531.3; found 531.5.

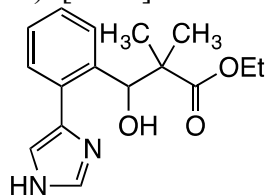

ethyl 3-(2-(1H-imidazol-4-yl)phenyl)-3-hydroxy-2,2-dimethylpropanoate (**73**): Acetic acid (15 mL) was added to a stirred solution of ethyl 3-hydroxy-2,2-dimethyl-3-(2-(1-trityl-1H-imidazol-4-yl)phenyl)propanoate (**72**, 5.50 g, 10 mmol) in methanol (35 mL). The reaction was stirred for 5 h at 80 °C. The mixture was concentrated under vacuum. The residue was partitioned between water and ethyl acetate. The organic layer was washed with water and dried over anhydrous sodium sulfate. Purification by silica gel flash chromatography with 1–15% methanol–dichloromethane afforded the title compound (3.0 g, >99%) as a yellow solid. LCMS-ESI (*m/z*):  $[M+H]^+$  calcd for C<sub>16</sub>H<sub>21</sub>N<sub>2</sub>O<sub>3</sub>, 289.2; found 289.2.

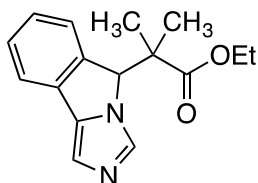

ethyl 2-(5H-imidazo[5,1-a]isoindol-5-yl)-2-methylpropanoate (**74**): Ethyl 3-(2-(1H-imidazol-4-yl)phenyl)-3-hydroxy-2,2-dimethylpropanoate (**73**, 525 mg, 1.8 mmol) was added to a stirred solution of cyanomethylene trimethylphosphorane (0.5 M, 10 mL, 5 mmol) in tetrahydrofuran. The reaction was stirred for 12 h at ambient temperature. The mixture was partitioned between

water and ethyl acetate. The organic layer was washed with water and dried over anhydrous sodium sulfate. Purification by silica gel flash chromatography with 1–15% methanol–dichloromethane afforded the title compound (410 mg, 83%) as a yellow solid. LCMS-ESI ( $m/z$ ):  $[M+H]^+$  calcd for  $C_{17}H_{19}N_2O_2$ , 271.1; found 271.3.

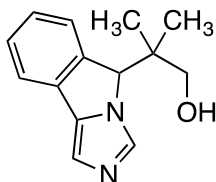

2-(5*H*-imidazo[5,1-*a*]isoindol-5-yl)-2-methylpropan-1-ol (**75**): A solution of diisobutylaluminum hydride (1 M, 22 mL, 22 mmol) in toluene was added to a stirred solution of ethyl 2-(5*H*-imidazo[5,1-*a*]isoindol-5-yl)-2-methylpropanoate (**74**, 1.20 g, 4.4 mmol) in tetrahydrofuran (10 mL) at 0 °C. The mixture was allowed to warm to ambient temperature for 2 h. The reaction was quenched by addition of saturated aqueous ammonium chloride solution. The biphasic mixture was partitioned between water and ethyl acetate. The organic layer was washed with water and dried over anhydrous sodium sulfate. The solvent was removed under vacuum. Purification by silica gel flash chromatography with 1–15% methanol–dichloromethane afforded the title compound (700 mg, 69%) as a pale yellow solid. LCMS-ESI ( $m/z$ ):  $[M+H]^+$  calcd for  $C_{14}H_{17}N_2O$ , 229.1; found 229.1.

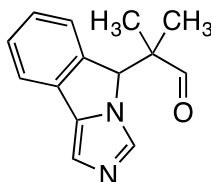

2-(5*H*-imidazo[5,1-*a*]isoindol-5-yl)-2-methylpropanal (**76**): A solution of Dess-Martin periodinane (19.0 g, 44 mmol) in dichloromethane (50 mL) was added to a stirred solution of 2-(5*H*-imidazo[5,1-*a*]isoindol-5-yl)-2-methylpropan-1-ol (**75**, 5.00 g, 22 mmol) in dichloromethane (50 mL). Following addition, sodium bicarbonate (5.80 g, 66 mmol) was added. The suspension was stirred for 3 h at ambient temperature. The reaction mixture was concentrated under vacuum. The residue was partitioned between water and ethyl acetate. The organic layer was washed with water and dried over anhydrous sodium sulfate. The solvent was removed under vacuum. Purification by silica gel flash chromatography with 1–15% methanol–dichloromethane afforded the title compound (4.1 g, 83%) as a yellow solid. LCMS-ESI ( $m/z$ ):  $[M+H]^+$  calcd for  $C_{14}H_{15}N_2O$ , 227.1; found 227.1.

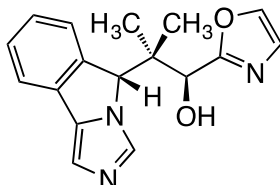

(*S*)-2-((*R*)-5*H*-imidazo[5,1-*a*]isoindol-5-yl)-2-methyl-1-(oxazol-2-yl)propan-1-ol (**19**): A solution of oxazole (95 mg, 1.4 mmol) and borane–tetrahydrofuran complex (1 M in tetrahydrofuran, 1.4 mL, 1.4 mmol) in tetrahydrofuran (0.50 mL) was stirred for 30 min at ambient temperature. The solution was cooled to –78 °C. *n*-Butyllithium (2.5 M in hexanes, 0.54 mL, 1.4 mmol) was added. The mixture was stirred for 30 min at –78 °C. A solution of 2-(5*H*-imidazo[5,1-*a*]isoindol-5-yl)-2-methylpropanal (**76**, 77 mg, 0.34 mmol) in tetrahydrofuran (0.20 mL) was added. The reaction was then stirred for 1 h at –40 °C. The reaction was quenched with



water and extracted with ethyl acetate. The organic layer was washed with water and dried over anhydrous sodium sulfate. The solvent was removed under vacuum. Purification by silica gel flash chromatography with 1–10% methanol–dichloromethane afforded the title compound (30 mg, 29%) as a mixture of diastereomers. LCMS-ESI (m/z):  $[M+H]^+$  calcd for  $C_{17}H_{18}N_3O_2$ , 296.1; found 296.1.  $^1H$  NMR (400 MHz, DMSO- $d_6$ ):  $\delta$  7.46 – 7.36 (m, 1H), 7.31 – 7.21 (m, 2H), 7.17 (s, 1H), 6.35 (d, 4.7 Hz, 1H), 1.10 (s, 3H), 0.32 (s, 3H). Chiral SFC:  $t_R$  = 0.858 min, Trefoil Cel-4, 25% methanol (0.1% ammonium hydroxide)–carbon dioxide.

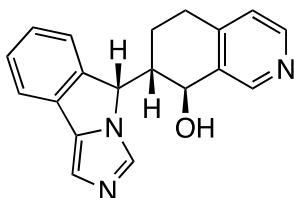

**(7*S*,8*S*)-7-((*S*)-5*H*-imidazo[5,1-*a*]isoindol-5-yl)-5,6,7,8-tetrahydroisoquinolin-8-ol (20).**

LCMS-ESI (m/z):  $[M+H]^+$  calcd for  $C_{19}H_{18}N_3O$ , 304.1; found 304.1.  $^1H$  NMR (300 MHz,  $CD_3OD$ ):  $\delta$  8.79 (s, 1H), 8.27 (d,  $J$  = 5.1 Hz, 1H), 7.99 (s, 1H), 7.66 – 7.64 (m, 1H), 7.50 – 7.32 (m, 3H), 7.20 (s, 1H), 7.18 (d,  $J$  = 5.1 Hz, 1H), 5.89 (d,  $J$  = 3.0 Hz, 1H), 5.10 (d,  $J$  = 10.5 Hz, 1H), 2.70 – 2.68 (m, 2H), 2.50 – 2.42 (m, 1H), 1.14 – 0.98 (m, 2H). Chiral SFC:  $t_R$  = 1.182 min, Trefoil Amy-4, 25% methanol (0.1% ammonium hydroxide)–carbon dioxide.

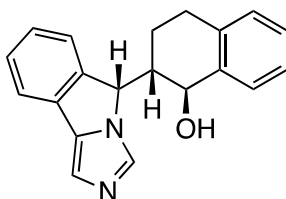

**(1*S*,2*S*)-2-((*S*)-5*H*-imidazo[5,1-*a*]isoindol-5-yl)-1,2,3,4-tetrahydronaphthalen-1-ol (21).**

LCMS-ESI (m/z):  $[M+H]^+$  calcd for  $C_{20}H_{19}N_2O$ , 303.2; found 303.1.  $^1H$  NMR (400 MHz, DMSO- $d_6$ ): 7.96 (s, 1H), 7.66 (d,  $J$  = 7.7 Hz, 1H), 7.63 (d,  $J$  = 7.4 Hz, 1H), 7.50 – 7.46 (m, 1H), 7.41 (t,  $J$  = 7.4 Hz, 1H), 7.31 (td,  $J$  = 7.5, 1.2 Hz, 1H), 7.23 (td,  $J$  = 7.5, 1.2 Hz, 1H), 7.18 (s, 1H), 7.14 (td,  $J$  = 7.4, 1.4 Hz, 1H), 7.00 (dd,  $J$  = 7.5, 1.3 Hz, 1H), 5.97 (d,  $J$  = 7.7 Hz, 1H), 5.84 – 5.78 (m, 1H), 4.93 (dd,  $J$  = 10.6, 7.8 Hz), 2.56 (s, 3H), 2.38 (tt,  $J$  = 11.2, 2.9 Hz, 1H), 0.95 – 0.73 (m, 2H). Chiral HPLC:  $t_R$  = 7.284 min, Daicel OZ-H, 90% hexanes (0.1% diethanolamine)–ethanol.

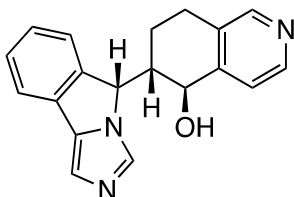

**(5*S*,6*S*)-6-((*S*)-5*H*-imidazo[5,1-*a*]isoindol-5-yl)-5,6,7,8-tetrahydroisoquinolin-5-ol (22).**

LCMS-ESI (m/z):  $[M+H]^+$  calcd for  $C_{19}H_{18}N_3O$ , 304.1; found 304.2.  $^1H$  NMR (300 MHz,  $CD_3OD$ ):  $\delta$  8.39 – 8.37 (m, 1H), 8.23 (s, 1H), 8.04 (s, 1H), 7.72 – 7.66 (m, 2H), 7.51 – 7.35 (m, 3H), 7.24 (s, 1H), 5.91 (s, 1H), 5.04 (d,  $J$  = 5.4 Hz, 1H), 2.71 – 2.68 (m, 2H), 2.53 – 2.46 (m, 1H), 1.20 – 1.17 (m, 1H), 1.08 – 0.94 (m, 1H). Chiral SFC:  $t_R$  = 1.397 min, Chiralpak AS-3, 10–50% methanol (0.1% ammonium hydroxide)–carbon dioxide.

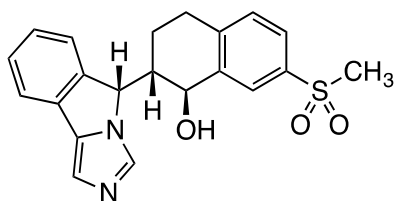

**(1*S*,2*S*)-2-((*S*)-5*H*-imidazo[5,1-*a*]isoindol-5-yl)-7-(methylsulfonyl)-1,2,3,4-tetrahydronaphthalen-1-ol (23).** LCMS-ESI (*m/z*): [*M*+*H*]<sup>+</sup> calcd for C<sub>21</sub>H<sub>21</sub>N<sub>2</sub>O<sub>3</sub>S, 381.1; found 381.1. <sup>1</sup>HNMR (500 MHz, DMSO-*d*<sub>6</sub>): δ 8.29 (s, 1H), 8.18 (dd, *J* = 2.2, 0.9 Hz, 1H), 7.73 – 7.68 (m, 2H), 7.53 (dq, *J* = 7.7, 1.0 Hz, 1H), 7.46 (tt, *J* = 7.6, 0.8 Hz, 1H), 7.37 (td, *J* = 7.5, 1.1 Hz, 2H), 7.31 (d, *J* = 8.0 Hz, 1H), 6.27 (d, *J* = 7.7 Hz, 1H), 5.90 (s, 1H), 4.99 – 4.92 (m, 1H), 3.18 (s, 3H), 2.70 (d, *J* = 4.2 Hz, 2H), 1.05 – 0.83 (m, 2H). Chiral SFC: *t*<sub>R</sub> = 1.948 min, Lux Cell-3, 10–50% methanol (0.1% ammonium hydroxide)–carbon dioxide.

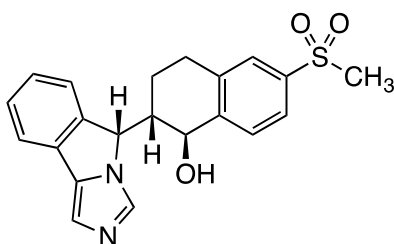

**(1*S*,2*S*)-2-((*S*)-5*H*-imidazo[5,1-*a*]isoindol-5-yl)-6-(methylsulfonyl)-1,2,3,4-tetrahydronaphthalen-1-ol (24).** LCMS-ESI (*m/z*): [*M*+*H*]<sup>+</sup> calcd for C<sub>21</sub>H<sub>21</sub>N<sub>2</sub>O<sub>3</sub>S, 381.1; found 381.2. <sup>1</sup>HNMR (500 MHz, CDCl<sub>3</sub>): δ 7.92 (d, *J* = 8.2 Hz, 1H), 7.79 (d, *J* = 8.3 Hz, 1H), 7.68 (s, 1H), 7.54 – 7.62 (m, 2H), 7.40 (t, *J* = 7.5 Hz, 1H), 7.31 (app dd, *J* = 20.3, 7.6 Hz, 2H), 7.19 (s, 1H), 5.86 (s, 1H), 4.98 (d, *J* = 10.7 Hz, 1H), 3.04 (d, *J* = 2.0 Hz, 3H), 2.69 – 2.80 (m, 2H), 2.42 (t, *J* = 11.6 Hz, 1H), 1.25 (d, *J* = 14.1 Hz, 1H), 1.04 (dd, *J* = 12.4, 6.9 Hz, 1H). Chiral SFC: *t*<sub>R</sub> = 1.160 min, Chiralpak AS-3, 20% methanol (0.1% isopropylamine)–carbon dioxide.

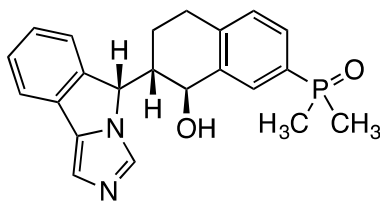

**((7*S*,8*S*)-8-hydroxy-7-((*S*)-5*H*-imidazo[5,1-*a*]isoindol-5-yl)-5,6,7,8-tetrahydronaphthalen-2-yl)dimethylphosphine oxide (25).** A suspension of 7-bromo-2-(5*H*-imidazo[5,1-*a*]isoindol-5-yl)-1,2,3,4-tetrahydronaphthalen-1-ol (**56k**, 1.27 g, 3.3 mmol), dimethylphosphine oxide (516 mg, 6.5 mmol), palladium(II) acetate (163 mg, 0.73 mmol), 4,5-bis(diphenylphosphino)-9,9-dimethylxanthene (1.00 g, 1.7 mmol) and potassium phosphate (2.32 g, 11 mmol) in *N,N*-dimethylformamide (11 mL) were heated in a microwave reactor at 140 °C for 30 min. The reaction mixture was diluted with dichloromethane (100 mL) and filtered. The solvent was removed under vacuum. The filtrate was suspended in ethyl acetate–dichloromethane (1:1, 100 mL) and sonicated. The suspension was filtered. The filtrate was concentrated under vacuum. Purification by silica gel flash chromatography with 0–25% methanol–dichloromethane afforded the title compound (1.1 g, 85%) as a mixture of diastereomers. LCMS-ESI (*m/z*): [*M*+*H*]<sup>+</sup> calcd for C<sub>22</sub>H<sub>24</sub>N<sub>2</sub>O<sub>2</sub>P, 379.2; found 379.2. <sup>1</sup>H NMR (400 MHz, DMSO-*d*<sub>6</sub>): δ 8.08 (dd, *J* = 12.2, 1.4

Hz, 1H), 7.97 (s, 1H), 7.64 (dt,  $J = 7.6, 0.9$  Hz, 1H), 7.55 – 7.45 (m, 2H), 7.41 (tt,  $J = 7.5, 0.9$  Hz, 1H), 7.31 (td,  $J = 7.5, 1.1$  Hz, 1H), 7.18 (s, 1H), 7.15 (dd,  $J = 7.8, 2.9$  Hz, 1H), 6.14 (d,  $J = 7.7$  Hz, 1H), 5.84 – 5.78 (m, 1H), 4.96 (dd,  $J = 10.7, 7.7$  Hz, 1H), 2.65 – 2.56 (m, 2H), 2.46 – 2.36 (m, 1H), 1.64 (dd,  $J = 13.3, 2.5$  Hz, 6H), 0.98 – 0.75 (m, 2H). Chiral SFC:  $t_R = 0.790$  min, Chiralcel OX, 40% methanol (0.1% isopropylamine)–carbon dioxide.

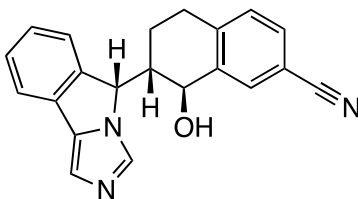

**(7S,8S)-8-hydroxy-7-((S)-5H-imidazo[5,1-a]isoindol-5-yl)-5,6,7,8-tetrahydronaphthalene-2-carbonitrile (26).** LCMS-ESI ( $m/z$ ):  $[M+H]^+$  calcd for  $C_{21}H_{18}N_3O$ , 328.1; found 328.1.  $^1H$  NMR (400 MHz,  $DMSO-d_6$ ):  $\delta$  8.04 – 7.93 (m, 2H), 7.69 – 7.56 (m, 2H), 7.52 – 7.45 (m, 1H), 7.41 (ddd,  $J = 8.2, 7.2, 1.0$  Hz, 1H), 7.31 (td,  $J = 7.6, 1.1$  Hz, 1H), 7.23 (d,  $J = 8.0$  Hz, 1H), 7.18 (s, 1H), 6.30 (d,  $J = 7.4$  Hz, 1H), 5.81 (d,  $J = 1.8$  Hz, 1H), 4.95 (dd,  $J = 10.6, 7.3$  Hz, 1H), 2.66 (dd,  $J = 8.7, 4.4$  Hz, 2H), 2.45 – 2.31 (m, 1H), 0.98 – 0.90 (m, 1H), 0.85 (dd,  $J = 8.1, 3.9$  Hz, 1H). Chiral SFC:  $t_R = 1.530$  min, Chiralpak OX-H, 50% methanol (0.1% isopropylamine)–carbon dioxide.

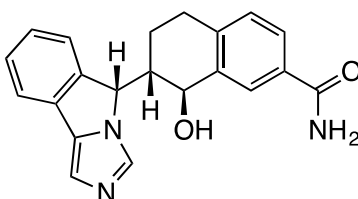

**(7S,8S)-8-hydroxy-7-((S)-5H-imidazo[5,1-a]isoindol-5-yl)-5,6,7,8-tetrahydronaphthalene-2-carboxamide (27).** LCMS-ESI ( $m/z$ ):  $[M+H]^+$  calcd for  $C_{21}H_{20}N_3O_2$ , 346.2; found 346.1.  $^1H$  NMR (400 MHz,  $DMSO-d_6$ ):  $\delta$  8.22 (dd,  $J = 1.9, 0.9$  Hz, 1H), 7.95 (t,  $J = 0.6$  Hz, 1H), 7.90 (s, 1H), 7.69 – 7.61 (m, 2H), 7.48 (dq,  $J = 7.6, 0.9$  Hz, 1H), 7.46 – 7.37 (m, 1H), 7.31 (td,  $J = 7.5, 1.1$  Hz, 1H), 7.24 (s, 1H), 7.18 (s, 1H), 7.06 (d,  $J = 7.9$  Hz, 1H), 6.06 (d,  $J = 7.8$  Hz, 1H), 5.83 (d,  $J = 1.9$  Hz, 1H), 5.04 – 4.85 (m, 1H), 3.51 – 3.39 (m, 1H), 2.65 – 2.56 (m, 2H), 2.45 – 2.32 (m, 1H), 1.30 – 1.19 (m, 1H). Chiral SFC:  $t_R = 0.8491$  min, Chiralpak OX-H, 40% methanol (0.1% isopropylamine)–carbon dioxide.

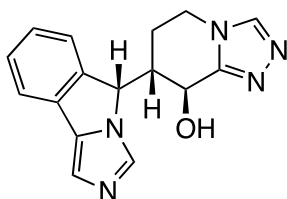

**(7S,8S)-7-((S)-5H-imidazo[5,1-a]isoindol-5-yl)-5,6,7,8-tetrahydro-[1,2,4]triazolo[4,3-a]pyridin-8-ol (28).** LCMS-ESI ( $m/z$ ):  $[M+H]^+$  calcd for  $C_{16}H_{16}N_5O$ , 394.1; found 294.1.  $^1H$  NMR (300 MHz,  $CD_3OD$ ):  $\delta$  8.41 (s, 1H), 8.13 (s, 1H), 7.69 – 7.56 (m, 2H), 7.50 – 7.29 (m, 2H), 7.17 (s, 1H), 5.68 (s, 1H), 5.47 (d,  $J = 3.5$  Hz, 1H), 4.25 – 4.12 (m, 1H), 3.79 – 3.61 (m, 1H), 2.88 – 2.75 (m, 1H), 1.95 – 1.89 (m, 1H), 1.24 (d,  $J = 13.9$  Hz, 1H). Chiral HPLC:  $t_R = 3.827$  min, Chiralpak AD-H, 50% hexanes (0.1% diethanolamine)–ethanol.

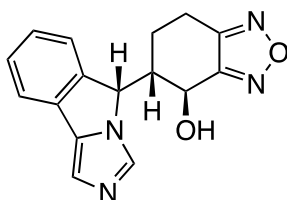

**(4*S*,5*S*)-5-((*S*)-5*H*-imidazo[5,1-*a*]isoindol-5-yl)-4,5,6,7-tetrahydrobenzo[*c*][1,2,5]oxadiazol-4-ol (29).** LCMS-ESI (*m/z*): [ $M+H$ ]<sup>+</sup> calcd for C<sub>16</sub>H<sub>15</sub>N<sub>4</sub>O<sub>2</sub>, 295.1; found 295.4. <sup>1</sup>HNMR (500 MHz, DMSO-*d*<sub>6</sub>): δ 7.99 (s, 1H), 7.64 (dt, *J* = 7.7, 1.0 Hz, 1H), 7.52 – 7.46 (m, 1H), 7.43 (tt, *J* = 7.6, 0.9 Hz, 1H), 7.33 (td, *J* = 7.6, 1.1 Hz, 1H), 7.19 (s, 1H), 6.69 (d, *J* = 7.2 Hz, 1H), 5.80 – 5.71 (m, 1H), 5.26 (dd, *J* = 11.0, 7.3 Hz, 1H), 2.78 (dt, *J* = 17.3, 3.8 Hz, 1H), 2.65 – 2.53 (m, 2H), 0.96 (dtd, *J* = 11.2, 6.4, 3.9 Hz, 2H). Chiral SFC: *t*<sub>R</sub> = 0.990 min, Chiralpak OX-H, 45% ethanol (0.1% isopropylamine)–carbon dioxide.

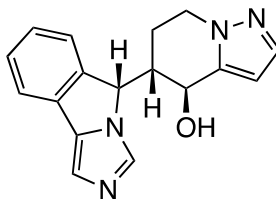

**(4*S*,5*S*)-5-((*S*)-5*H*-imidazo[5,1-*a*]isoindol-5-yl)-4,5,6,7-tetrahydropyrazolo[1,5-*a*]pyridin-4-ol (30).** LCMS-ESI (*m/z*): [ $M+H$ ]<sup>+</sup> calcd for C<sub>17</sub>H<sub>17</sub>N<sub>4</sub>O, 293.1; found 293.5. <sup>1</sup>HNMR (500 MHz, DMSO-*d*<sub>6</sub>): δ 7.98 (s, 1H), 7.64 (dt, *J* = 7.6, 0.9 Hz, 1H), 7.51 (dd, *J* = 7.6, 1.0 Hz, 1H), 7.46 – 7.38 (m, 2H), 7.34 (dd, *J* = 7.5, 1.1 Hz, 1H), 7.19 (s, 1H), 6.31 (dd, *J* = 1.9, 0.8 Hz, 1H), 6.18 (d, *J* = 7.2 Hz, 1H), 5.76 (d, *J* = 1.9 Hz, 1H), 5.03 (dd, *J* = 10.5, 7.2 Hz, 1H), 4.01 – 3.93 (m, 1H), 3.84 – 3.73 (m, 1H), 2.59 – 2.51 (m, 1H), 1.16 – 1.01 (m, 2H). SFC: *t*<sub>R</sub> = 1.238 min, Chiralpak OX-H, 30% methanol (0.1% isopropylamine)–carbon dioxide.

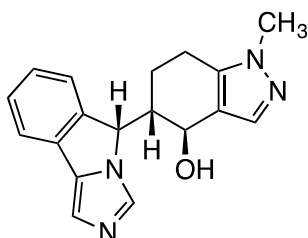

**(4*S*,5*S*)-5-((*S*)-5*H*-imidazo[5,1-*a*]isoindol-5-yl)-1-methyl-4,5,6,7-tetrahydro-1*H*-indazol-4-ol (31).** LCMS-ESI (*m/z*): [ $M+H$ ]<sup>+</sup> calcd for C<sub>18</sub>H<sub>19</sub>N<sub>4</sub>O, 307.2; found 307.1. <sup>1</sup>HNMR (500 MHz, DMSO-*d*<sub>6</sub>): δ 7.92 (s, 1H), 7.63 (d, *J* = 7.5 Hz, 1H), 7.45 (d, *J* = 7.6 Hz, 1H), 7.43 – 7.29 (m, 3H), 7.17 (s, 1H), 5.76 (s, 1H), 5.62 (d, *J* = 7.1 Hz, 1H), 4.92 (d, *J* = 8.0 Hz, 1H), 3.58 (s, 3H), 2.44 (dd, *J* = 16.2, 5.4 Hz, 1H), 2.36 – 2.25 (m, 1H), 2.20 (td, *J* = 11.9, 2.5 Hz, 1H), 0.96 – 0.79 (m, 2H). SFC: *t*<sub>R</sub> = 1.345 min, Chiralpak OX-H, 45% methanol (0.1% isopropylamine)–carbon dioxide.

## Pharmacological Assays

### *TDO (1.13.11.11) Biochemical Assay*

Test compound is added to duplicate wells of a 384 well v-bottom polypropylene microplate (Greiner) as 100 nL of DMSO solution for a final concentration of 3 nM to 25  $\mu$ M in the enzyme reaction. 10  $\mu$ L human recombinant TDO enzyme (NTRC) is added at 50 nM in assay buffer (50 mM sodium phosphate pH 7.0, 0.01% Tween-20) with 2 mM tris(2-carboxyethyl)phosphine (TCEP, Sigma) and 100  $\mu$ M sodium-L-ascorbate (Sigma). Enzyme is not added to low control wells. After 5 minutes pre-incubation at ambient temperature, the reaction is initiated by the addition of 10  $\mu$ L L-tryptophan (Calbiochem) at 400  $\mu$ M in assay buffer. The final tryptophan concentration of 200  $\mu$ M is slightly higher than the apparent hTDO  $K_m$  for tryptophan measured as 160  $\mu$ M. After 15 minutes reaction at ambient temperature, the reaction is stopped by a 20  $\mu$ L addition of 1% formic acid (Thermo). 60  $\mu$ L 0.1% formic acid (Burdick and Jackson) is added to dilute the reaction mixture. Tryptophan and NFK concentrations are measured using a RapidFire (Biocius) coupled to an ABSciex 5500 QTrap mass spectrometer. Briefly, samples are loaded onto a phenyl cartridge (Agilent) and eluted with 0.1% formic acid in 80% acetonitrile followed by ionization, m/z selection, and identification by fragmentation. Analyst and RapidFire Integrator software (Biocius) are used to identify substrate and product peaks and calculate area under the curve (AUC). The normalized ratio of AUCNFK divided by (AUCtryptophan + AUCNFK) is calculated for each well to minimize the effect of injection variability. Signal is further normalized to % inhibition relative to DMSO treatment as 0% inhibition and low control wells as 100% inhibition.  $IC_{50}$  values are determined using a four-parameter fit of percent inhibition versus compound concentration using Genedata Analyst software (Genedata).

### *IDO and TDO Cell Assays*

The NFK GreenScreen<sup>TM</sup> (NTRC, Netherlands) uses a specific chemical probe that binds to *N*-Formylkynurenine (NFK), a product of tryptophan catabolism facilitated by IDO1 or TDO and causes fluorescence at 510 nm when excited at 410 nm. The assay is used to assess compound inhibition of TDO and IDO1 leading to decreased levels of NFK in SW48 cells (high TDO expressing cells) and to determine whether compounds are selective against A172+IFN $\gamma$  cells (high IDO expressing cells) or are dual inhibitors in cells. The assay is multiplexed with Cell Titer-Glo<sup>®</sup> (Promega) to determine if compounds are cytotoxic. Briefly, SW48 or A172 cells are harvested in growth media, RPMI 1640 with 10% FBS, 2 mM L-glutamine, and 1 $\times$  pen/strep. Cells are re-suspended in assay media, tryptophan-free RPMI 1640 supplemented with 2% dialyzed FBS, 2 mM L-glutamine, and 1 $\times$  pen/strep. Cells are counted on a Vi-Cell (Beckman Coulter). SW48 cells are diluted to 1 $\times$ 10<sup>6</sup> cells/ml in assay media. A172 cells are diluted to 0.24 $\times$ 10<sup>6</sup> cells/mL in assay media. 25  $\mu$ L of cells are dispensed with a Multi-Flo (Bio-Tek) dispenser to a 384 well greiner  $\mu$ clear plate (Greiner, 781091) with 14 compounds in duplicate. Compounds are dispensed into plates with an Echo<sup>®</sup> (Labcyte) starting at the highest concentration of 25  $\mu$ M and are diluted approximately 3 $\times$  in a 10-point titration. 5  $\mu$ L of assay media containing 1.2 mM tryptophan are added to the SW48 cells for a final concentration of 200  $\mu$ M tryptophan in each well. 5  $\mu$ L of assay media containing 600  $\mu$ M tryptophan and 600

ng/mL IFN $\gamma$  are added to the A172 cells for a final concentration of 100  $\mu$ M tryptophan and 100 ng/mL IFN $\gamma$  in each well. The final DMSO concentration is 0.5%. Cell plates are placed at room temperature in a closed TC hood with the blower off to allow cells to settle for approximately 30 min. Plates are then moved to an incubator set at 37 °C, 5% CO<sub>2</sub> for 24 hours. After the 24 hour compound incubation, 8  $\mu$ L of NFK green reagent is added to each well with a Multidrop<sup>TM</sup> Combi dispenser (Thermo Scientific). Plates are sealed and incubated at 37 °C, 5% CO<sub>2</sub> for 5 hours, then read on a PHERAstar®(BMG labtech). Data are analyzed by normalizing to DMSO and high inhibitor controls. After the plates have been read for NFK green, 25  $\mu$ L of Cell Titer-Glo® (Promega) are added to each well, incubated for 15 minutes at room temperature, and read on the Envision (Perkin Elmer). Cell Titer-Glo data are analyzed by normalizing to the DMSO controls. Four parameter curve fitting is used and EC<sub>50</sub> data are reported to the database.

## TDO2 Expression, Purification and Crystallization

C-terminal FLAG-tagged TDO2 L18-F388 was expressed in insect cells in the presence of 4  $\mu$ M hemin and 0.4 mM 5-aminolevulinic acid (5-ALA). After the first 4 hours of infection, 100  $\mu$ M tryptophan was added. The cells were harvested then lysed in a buffer of 50 mM HEPES pH 7.5, 1.0 M sodium chloride, 10 mM tryptophan, 200  $\mu$ g/mL sodium nitroprusside (SNP), 5% glycerol, 50  $\mu$ M E-64 protease inhibitor, 0.5  $\mu$ g/mL leupeptin, 1 mM phenylmethane sulfonyl fluoride (PMSF) and Calbiochem protease inhibitor cocktail set III, EDTA-free. The protein was purified using equilibrated anti-FLAG M2 affinity agarose gel (Sigma) by gravity flow and then eluted with 150  $\mu$ g/mL FLAG peptide. The pooled FLAG-tagged protein was concentrated and purified over an equilibrated S75 16/60 gel filtration column in a buffer of 20 mM HEPES pH 7.5, 1.0M sodium chloride, 5% glycerol, 200  $\mu$ M tryptophan, 200  $\mu$ g/mL SNP. The BCA assay was used to measure TDO2 protein concentration. The protein was concentrated to 20 mg/mL and flash frozen in liquid nitrogen. Heme incorporation was determined by measuring the ratio of A406/A280, with a value of 2.2 representing 100% heme incorporation.<sup>7</sup> TDO2 protein samples purified for crystallography were measured to have a 406:280 ratio of 1.1 or above. TDO2 samples were also measured via ICP-MS and confirmed to have >67% heme incorporation.

After adding 1 mM of the compound to the TDO2-heme protein, single crystals of TDO2-heme were grown in a 1:1 ratio of protein:well solution of 100 mM MES, pH 6.0, 16%-19% PEG 6000, 0.2M calcium chloride and 3% ethylene glycol. Red rod-shaped crystals appeared about 6 days after setup at 4°C. The crystals were then harvested in a cryo-protectant solution of 8%-10% ethylene glycol and 2% sucrose, flash frozen in liquid nitrogen for data collection.

Data were collected at the Stanford Synchrotron Radiation Lightsource (SSRL) beamline 12-2. The structure was determined by molecular replacement using PHASER<sup>8</sup> and search model 4PW8, subsequently refined with iterative cycles of manual model building (COOT<sup>9</sup>) and refinement (BUSTER<sup>10</sup>). The final statistics on data reduction and refinement are shown in supplemental Table X. Coordinates and structure factors are deposited under accession code 6VBN.

**Table S3.** Data collection and refinement statistics.

|                           | <b>6VBN</b>                     |
|---------------------------|---------------------------------|
| <b>Wavelength</b>         | 0.9795                          |
| <b>Resolution range</b>   | 39.27 - 3.18 (3.294 - 3.18)     |
| <b>Space group</b>        | P 21 21 21                      |
| <b>Unit cell</b>          | 78.475 143.044 147.236 90 90 90 |
| <b>Total reflections</b>  | 376599 (38816)                  |
| <b>Unique reflections</b> | 28519 (2802)                    |
| <b>Multiplicity</b>       | 13.2 (13.9)                     |
| <b>Completeness (%)</b>   | 99.71 (99.82)                   |
| <b>Mean I/sigma(I)</b>    | 17.58 (2.22)                    |

|                                       |                 |
|---------------------------------------|-----------------|
| <b>Wilson B-factor</b>                | 93.23           |
| <b>R-merge</b>                        | 0.1371 (1.634)  |
| <b>R-meas</b>                         | 0.1427 (1.696)  |
| <b>R-pim</b>                          | 0.0391 (0.4499) |
| <b>CC1/2</b>                          | 0.999 (0.82)    |
| <b>CC*</b>                            | 1 (0.949)       |
| <b>Reflections used in refinement</b> | 28510 (2801)    |
| <b>Reflections used for R-free</b>    | 1383 (150)      |
| <b>R-work</b>                         | 0.2102 (0.3188) |
| <b>R-free</b>                         | 0.2496 (0.3704) |
| <b>CC(work)</b>                       | 0.958 (0.806)   |
| <b>CC(free)</b>                       | 0.963 (0.799)   |
| <b>Number of non-hydrogen atoms</b>   | 11873           |
| <b>macromolecules</b>                 | 11589           |
| <b>ligands</b>                        | 248             |
| <b>solvent</b>                        | 36              |
| <b>Protein residues</b>               | 1375            |
| <b>RMS(bonds)</b>                     | 0.014           |
| <b>RMS(angles)</b>                    | 1.62            |
| <b>Ramachandran favored (%)</b>       | 95.98           |
| <b>Ramachandran allowed (%)</b>       | 3.66            |
| <b>Ramachandran outliers (%)</b>      | 0.37            |
| <b>Rotamer outliers (%)</b>           | 4.66            |
| <b>Clashscore</b>                     | 2.56            |
| <b>Average B-factor</b>               | 110.85          |
| <b>macromolecules</b>                 | 111.01          |
| <b>ligands</b>                        | 108.83          |
| <b>solvent</b>                        | 71.34           |

Statistics for the highest-resolution shell are shown in parentheses



## Small Molecule X-ray Crystallography

### Experimental data for SC-XRD on Compound 7

X-ray quality crystals were grown from a saturated toluene/ethanol/methanol solution followed by the slow vapor diffusion of diisopropyl ether to deposit the crystal diffracted. A colorless rod 0.050 x 0.020 x 0.020 mm in size was mounted on a Cryoloop with Paratone oil. Data were collected in a nitrogen gas stream at 100(2) K using phi and omega scans. Crystal-to-detector distance was 60 mm and exposure time was 10 seconds per frame using a scan width of 2.0°. Data collection was 100.0% complete to 67.000° in theta. A total of 44320 reflections were collected covering the indices,  $-19 \leq h \leq 19$ ,  $-5 \leq k \leq 5$ ,  $-23 \leq l \leq 22$ . 5518 reflections were found to be symmetry independent, with an  $R_{\text{int}}$  of 0.0513. Indexing and unit cell refinement indicated a primitive, monoclinic lattice. The space group was found to be P 21 (No. 4). The data were integrated using the Bruker SAINT software program and scaled using the SADABS software program. Solution by iterative methods (SHELXT) produced a complete heavy-atom phasing model consistent with the proposed structure. All non-hydrogen atoms were refined anisotropically by full-matrix least-squares (SHELXL-2014). All hydrogen atoms were placed using a riding model. Their positions were constrained relative to their parent atom using the appropriate HFIX command in SHELXL-2014. Absolute stereochemistry was unambiguously determined to be *S* at C1, C12, C19, and C30, respectively.

Table 1. Crystal data and structure refinement for Compound 7.

X-ray ID      Compound 7  
Sample/notebook ID    Compound 7  
Empirical formula    C<sub>18</sub> H<sub>22</sub> N<sub>2</sub> O  
Formula weight      282.37  
Temperature    100(2) K  
Wavelength    1.54178 Å  
Crystal system      Monoclinic  
Space group    P 21  
Unit cell dimensions    a = 16.3071(3) Å      alpha = 90°.  
                              b = 4.73520(10) Å      beta = 97.8660(10)°.  
                              c = 19.7305(4) Å      gamma = 90°.  
Volume          1509.20(5) Å<sup>3</sup>  
Z                4  
Density (calculated) 1.243 Mg/m<sup>3</sup>  
Absorption coefficient    0.605 mm<sup>-1</sup>  
F(000) 608  
Crystal size    0.050 x 0.020 x 0.020 mm<sup>3</sup>  
Theta range for data collection    2.260 to 68.425°.  
Index ranges    -19<=h<=19, -5<=k<=5, -23<=l<=22  
Reflections collected 44320  
Independent reflections    5518 [R(int) = 0.0513]  
Completeness to theta = 67.000°    100.0 %  
Absorption correction Semi-empirical from equivalents  
Max. and min. transmission 0.929 and 0.815  
Refinement method    Full-matrix least-squares on F<sup>2</sup>  
Data / restraints / parameters 5518 / 1 / 381  
Goodness-of-fit on F<sup>2</sup> 1.048  
Final R indices [I>2sigma(I)] R1 = 0.0299, wR2 = 0.0738  
R indices (all data)    R1 = 0.0323, wR2 = 0.0753  
Absolute structure parameter 0.00(9)  
Extinction coefficient n/a  
Largest diff. peak and hole    0.164 and -0.165 e.Å<sup>-3</sup>

Table 2. Atomic coordinates ( x 104) and equivalent isotropic displacement parameters ( $\text{\AA}^2 \times 10^3$ ) for Compound 7. U(eq) is defined as one third of the trace of the orthogonalized  $U_{ij}$  tensor.

|       | x        | y | z        | U(eq)          |
|-------|----------|---|----------|----------------|
| C(1)  | 7535(1)  |   | 9506(4)  | 9157(1) 20(1)  |
| C(2)  | 8077(1)  |   | 8628(4)  | 9814(1) 21(1)  |
| C(3)  | 8016(1)  |   | 9489(5)  | 10477(1) 26(1) |
| C(4)  | 8553(1)  |   | 8307(5)  | 11008(1) 29(1) |
| C(5)  | 9128(1)  |   | 6275(5)  | 10882(1) 27(1) |
| C(6)  | 9197(1)  |   | 5428(5)  | 10219(1) 25(1) |
| C(7)  | 8671(1)  |   | 6645(5)  | 9683(1) 21(1)  |
| C(8)  | 8599(1)  |   | 6286(4)  | 8943(1) 21(1)  |
| C(9)  | 8922(1)  |   | 5085(5)  | 8406(1) 25(1)  |
| C(10) | 7910(1)  |   | 7729(4)  | 7970(1) 22(1)  |
| C(11) | 6632(1)  |   | 8638(4)  | 9164(1) 21(1)  |
| C(12) | 6061(1)  |   | 9229(4)  | 8502(1) 19(1)  |
| C(13) | 5151(1)  |   | 8499(4)  | 8560(1) 20(1)  |
| C(14) | 4809(1)  |   | 9916(5)  | 9159(1) 24(1)  |
| C(15) | 3904(1)  |   | 9099(5)  | 9179(1) 28(1)  |
| C(16) | 3359(1)  |   | 9828(5)  | 8510(1) 29(1)  |
| C(17) | 3689(1)  |   | 8450(5)  | 7908(1) 29(1)  |
| C(18) | 4598(1)  |   | 9209(5)  | 7888(1) 25(1)  |
| C(19) | 7428(1)  |   | 2719(4)  | 5467(1) 18(1)  |
| C(20) | 6936(1)  |   | 1229(4)  | 4861(1) 19(1)  |
| C(21) | 7063(1)  |   | 1278(5)  | 4183(1) 24(1)  |
| C(22) | 6554(1)  |   | -364(5)  | 3713(1) 27(1)  |
| C(23) | 5930(1)  |   | -2014(5) | 3921(1) 29(1)  |
| C(24) | 5801(1)  |   | -2091(5) | 4602(1) 25(1)  |
| C(25) | 6307(1)  |   | -450(4)  | 5070(1) 20(1)  |
| C(26) | 6319(1)  |   | -8(4)    | 5802(1) 20(1)  |
| C(27) | 5943(1)  |   | -547(5)  | 6370(1) 23(1)  |
| C(28) | 6900(1)  |   | 2548(5)  | 6670(1) 22(1)  |
| C(29) | 8318(1)  |   | 1593(4)  | 5602(1) 19(1)  |
| C(30) | 8784(1)  |   | 2305(4)  | 6301(1) 18(1)  |
| C(31) | 9683(1)  |   | 1286(4)  | 6373(1) 18(1)  |
| C(32) | 10223(1) |   | 2829(4)  | 5912(1) 20(1)  |
| C(33) | 11097(1) |   | 1604(5)  | 5990(1) 25(1)  |
| C(34) | 11506(1) |   | 1669(5)  | 6735(1) 26(1)  |
| C(35) | 10971(1) |   | 164(5)   | 7197(1) 25(1)  |
| C(36) | 10097(1) |   | 1395(4)  | 7119(1) 21(1)  |
| N(1)  | 8488(1)  |   | 6013(4)  | 7799(1) 25(1)  |
| N(2)  | 7951(1)  |   | 7937(4)  | 8653(1) 19(1)  |

|      |         |          |         |       |
|------|---------|----------|---------|-------|
| N(3) | 6307(1) | 1083(4)  | 6909(1) | 23(1) |
| N(4) | 6931(1) | 1937(4)  | 6010(1) | 19(1) |
| O(1) | 6163(1) | 12098(3) | 8313(1) | 22(1) |
| O(2) | 8718(1) | 5268(3)  | 6415(1) | 19(1) |

---

—

Table 3. Bond lengths [ $\text{\AA}$ ] and angles [ $^\circ$ ] for Compound 7.

|              |          |              |          |
|--------------|----------|--------------|----------|
| C(1)-N(2)    | 1.479(2) | C(18)-H(18B) | 0.9900   |
| C(1)-C(2)    | 1.523(3) | C(19)-N(4)   | 1.476(2) |
| C(1)-C(11)   | 1.530(3) | C(19)-C(20)  | 1.519(3) |
| C(1)-H(1)    | 1.0000   | C(19)-C(29)  | 1.535(2) |
| C(2)-C(3)    | 1.386(3) | C(19)-H(19)  | 1.0000   |
| C(2)-C(7)    | 1.399(3) | C(20)-C(21)  | 1.382(3) |
| C(3)-C(4)    | 1.388(3) | C(20)-C(25)  | 1.403(3) |
| C(3)-H(3)    | 0.9500   | C(21)-C(22)  | 1.393(3) |
| C(4)-C(5)    | 1.389(3) | C(21)-H(21)  | 0.9500   |
| C(4)-H(4)    | 0.9500   | C(22)-C(23)  | 1.387(3) |
| C(5)-C(6)    | 1.387(3) | C(22)-H(22)  | 0.9500   |
| C(5)-H(5)    | 0.9500   | C(23)-C(24)  | 1.390(3) |
| C(6)-C(7)    | 1.392(3) | C(23)-H(23)  | 0.9500   |
| C(6)-H(6)    | 0.9500   | C(24)-C(25)  | 1.389(3) |
| C(7)-C(8)    | 1.459(3) | C(24)-H(24)  | 0.9500   |
| C(8)-C(9)    | 1.370(3) | C(25)-C(26)  | 1.458(3) |
| C(8)-N(2)    | 1.374(2) | C(26)-C(27)  | 1.373(3) |
| C(9)-N(1)    | 1.378(3) | C(26)-N(4)   | 1.378(3) |
| C(9)-H(9)    | 0.9500   | C(27)-N(3)   | 1.381(3) |
| C(10)-N(1)   | 1.323(3) | C(27)-H(27)  | 0.9500   |
| C(10)-N(2)   | 1.344(2) | C(28)-N(3)   | 1.327(3) |
| C(10)-H(10)  | 0.9500   | C(28)-N(4)   | 1.341(2) |
| C(11)-C(12)  | 1.523(3) | C(28)-H(28)  | 0.9500   |
| C(11)-H(11A) | 0.9900   | C(29)-C(30)  | 1.520(2) |
| C(11)-H(11B) | 0.9900   | C(29)-H(29A) | 0.9900   |
| C(12)-O(1)   | 1.425(2) | C(29)-H(29B) | 0.9900   |
| C(12)-C(13)  | 1.542(3) | C(30)-O(2)   | 1.427(2) |
| C(12)-H(12)  | 1.0000   | C(30)-C(31)  | 1.531(2) |
| C(13)-C(14)  | 1.531(3) | C(30)-H(30)  | 1.0000   |
| C(13)-C(18)  | 1.535(3) | C(31)-C(32)  | 1.534(2) |
| C(13)-H(13)  | 1.0000   | C(31)-C(36)  | 1.535(2) |
| C(14)-C(15)  | 1.531(3) | C(31)-H(31)  | 1.0000   |
| C(14)-H(14A) | 0.9900   | C(32)-C(33)  | 1.528(3) |
| C(14)-H(14B) | 0.9900   | C(32)-H(32A) | 0.9900   |
| C(15)-C(16)  | 1.526(3) | C(32)-H(32B) | 0.9900   |
| C(15)-H(15A) | 0.9900   | C(33)-C(34)  | 1.529(3) |
| C(15)-H(15B) | 0.9900   | C(33)-H(33A) | 0.9900   |
| C(16)-C(17)  | 1.517(3) | C(33)-H(33B) | 0.9900   |
| C(16)-H(16A) | 0.9900   | C(34)-C(35)  | 1.523(3) |
| C(16)-H(16B) | 0.9900   | C(34)-H(34A) | 0.9900   |
| C(17)-C(18)  | 1.531(3) | C(34)-H(34B) | 0.9900   |
| C(17)-H(17A) | 0.9900   | C(35)-C(36)  | 1.527(3) |
| C(17)-H(17B) | 0.9900   | C(35)-H(35A) | 0.9900   |
| C(18)-H(18A) | 0.9900   | C(35)-H(35B) | 0.9900   |

C(36)-H(36A) 0.9900  
C(36)-H(36B) 0.9900

O(1)-H(1A) 0.8400  
O(2)-H(2) 0.8400

N(2)-C(1)-C(2) 99.73(15)  
N(2)-C(1)-C(11) 113.69(16)  
C(2)-C(1)-C(11) 111.47(15)  
N(2)-C(1)-H(1) 110.5  
C(2)-C(1)-H(1) 110.5  
C(11)-C(1)-H(1) 110.5  
C(3)-C(2)-C(7) 120.82(19)  
C(3)-C(2)-C(1) 127.92(18)  
C(7)-C(2)-C(1) 111.23(16)  
C(2)-C(3)-C(4) 118.3(2)  
C(2)-C(3)-H(3) 120.8  
C(4)-C(3)-H(3) 120.8  
C(3)-C(4)-C(5) 121.05(19)  
C(3)-C(4)-H(4) 119.5  
C(5)-C(4)-H(4) 119.5  
C(6)-C(5)-C(4) 120.82(19)  
C(6)-C(5)-H(5) 119.6  
C(4)-C(5)-H(5) 119.6  
C(5)-C(6)-C(7) 118.4(2)  
C(5)-C(6)-H(6) 120.8  
C(7)-C(6)-H(6) 120.8  
C(6)-C(7)-C(2) 120.52(18)  
C(6)-C(7)-C(8) 132.03(19)  
C(2)-C(7)-C(8) 107.45(17)  
C(9)-C(8)-N(2) 105.63(17)  
C(9)-C(8)-C(7) 146.67(19)  
N(2)-C(8)-C(7) 107.62(16)  
C(8)-C(9)-N(1) 109.46(18)  
C(8)-C(9)-H(9) 125.3  
N(1)-C(9)-H(9) 125.3  
N(1)-C(10)-N(2) 111.16(17)  
N(1)-C(10)-H(10) 124.4  
N(2)-C(10)-H(10) 124.4  
C(12)-C(11)-C(1) 114.83(15)  
C(12)-C(11)-H(11A) 108.6  
C(1)-C(11)-H(11A) 108.6  
C(12)-C(11)-H(11B) 108.6  
C(1)-C(11)-H(11B) 108.6  
H(11A)-C(11)-H(11B) 107.5  
O(1)-C(12)-C(11) 108.68(16)  
O(1)-C(12)-C(13) 112.39(16)  
C(11)-C(12)-C(13) 112.22(15)  
O(1)-C(12)-H(12) 107.8

C(11)-C(12)-H(12) 107.8  
C(13)-C(12)-H(12) 107.8  
C(14)-C(13)-C(18) 109.76(16)  
C(14)-C(13)-C(12) 114.50(16)  
C(18)-C(13)-C(12) 110.20(15)  
C(14)-C(13)-H(13) 107.4  
C(18)-C(13)-H(13) 107.4  
C(12)-C(13)-H(13) 107.4  
C(13)-C(14)-C(15) 111.30(17)  
C(13)-C(14)-H(14A) 109.4  
C(15)-C(14)-H(14A) 109.4  
C(13)-C(14)-H(14B) 109.4  
C(15)-C(14)-H(14B) 109.4  
H(14A)-C(14)-H(14B) 108.0  
C(16)-C(15)-C(14) 111.71(17)  
C(16)-C(15)-H(15A) 109.3  
C(14)-C(15)-H(15A) 109.3  
C(16)-C(15)-H(15B) 109.3  
C(14)-C(15)-H(15B) 109.3  
H(15A)-C(15)-H(15B) 107.9  
C(17)-C(16)-C(15) 110.67(17)  
C(17)-C(16)-H(16A) 109.5  
C(15)-C(16)-H(16A) 109.5  
C(17)-C(16)-H(16B) 109.5  
C(15)-C(16)-H(16B) 109.5  
H(16A)-C(16)-H(16B) 108.1  
C(16)-C(17)-C(18) 111.57(18)  
C(16)-C(17)-H(17A) 109.3  
C(18)-C(17)-H(17A) 109.3  
C(16)-C(17)-H(17B) 109.3  
C(18)-C(17)-H(17B) 109.3  
H(17A)-C(17)-H(17B) 108.0  
C(17)-C(18)-C(13) 112.53(16)  
C(17)-C(18)-H(18A) 109.1  
C(13)-C(18)-H(18A) 109.1  
C(17)-C(18)-H(18B) 109.1  
C(13)-C(18)-H(18B) 109.1  
H(18A)-C(18)-H(18B) 107.8  
N(4)-C(19)-C(20) 99.89(14)  
N(4)-C(19)-C(29) 112.79(15)  
C(20)-C(19)-C(29) 111.06(15)  
N(4)-C(19)-H(19) 110.9  
C(20)-C(19)-H(19) 110.9

|                     |            |                     |            |
|---------------------|------------|---------------------|------------|
| C(29)-C(19)-H(19)   | 110.9      | C(33)-C(32)-C(31)   | 111.27(16) |
| C(21)-C(20)-C(25)   | 120.35(18) | C(33)-C(32)-H(32A)  | 109.4      |
| C(21)-C(20)-C(19)   | 128.47(17) | C(31)-C(32)-H(32A)  | 109.4      |
| C(25)-C(20)-C(19)   | 111.13(16) | C(33)-C(32)-H(32B)  | 109.4      |
| C(20)-C(21)-C(22)   | 118.71(19) | C(31)-C(32)-H(32B)  | 109.4      |
| C(20)-C(21)-H(21)   | 120.6      | H(32A)-C(32)-H(32B) | 108.0      |
| C(22)-C(21)-H(21)   | 120.6      | C(32)-C(33)-C(34)   | 111.56(16) |
| C(23)-C(22)-C(21)   | 120.81(18) | C(32)-C(33)-H(33A)  | 109.3      |
| C(23)-C(22)-H(22)   | 119.6      | C(34)-C(33)-H(33A)  | 109.3      |
| C(21)-C(22)-H(22)   | 119.6      | C(32)-C(33)-H(33B)  | 109.3      |
| C(22)-C(23)-C(24)   | 120.96(19) | C(34)-C(33)-H(33B)  | 109.3      |
| C(22)-C(23)-H(23)   | 119.5      | H(33A)-C(33)-H(33B) | 108.0      |
| C(24)-C(23)-H(23)   | 119.5      | C(35)-C(34)-C(33)   | 110.85(16) |
| C(25)-C(24)-C(23)   | 118.19(19) | C(35)-C(34)-H(34A)  | 109.5      |
| C(25)-C(24)-H(24)   | 120.9      | C(33)-C(34)-H(34A)  | 109.5      |
| C(23)-C(24)-H(24)   | 120.9      | C(35)-C(34)-H(34B)  | 109.5      |
| C(24)-C(25)-C(20)   | 120.99(17) | C(33)-C(34)-H(34B)  | 109.5      |
| C(24)-C(25)-C(26)   | 131.64(18) | H(34A)-C(34)-H(34B) | 108.1      |
| C(20)-C(25)-C(26)   | 107.36(17) | C(34)-C(35)-C(36)   | 111.33(17) |
| C(27)-C(26)-N(4)    | 105.50(17) | C(34)-C(35)-H(35A)  | 109.4      |
| C(27)-C(26)-C(25)   | 146.69(19) | C(36)-C(35)-H(35A)  | 109.4      |
| N(4)-C(26)-C(25)    | 107.57(16) | C(34)-C(35)-H(35B)  | 109.4      |
| C(26)-C(27)-N(3)    | 109.35(17) | C(36)-C(35)-H(35B)  | 109.4      |
| C(26)-C(27)-H(27)   | 125.3      | H(35A)-C(35)-H(35B) | 108.0      |
| N(3)-C(27)-H(27)    | 125.3      | C(35)-C(36)-C(31)   | 111.49(15) |
| N(3)-C(28)-N(4)     | 111.01(18) | C(35)-C(36)-H(36A)  | 109.3      |
| N(3)-C(28)-H(28)    | 124.5      | C(31)-C(36)-H(36A)  | 109.3      |
| N(4)-C(28)-H(28)    | 124.5      | C(35)-C(36)-H(36B)  | 109.3      |
| C(30)-C(29)-C(19)   | 115.07(15) | C(31)-C(36)-H(36B)  | 109.3      |
| C(30)-C(29)-H(29A)  | 108.5      | H(36A)-C(36)-H(36B) | 108.0      |
| C(19)-C(29)-H(29A)  | 108.5      | C(10)-N(1)-C(9)     | 105.91(16) |
| C(30)-C(29)-H(29B)  | 108.5      | C(10)-N(2)-C(8)     | 107.83(16) |
| C(19)-C(29)-H(29B)  | 108.5      | C(10)-N(2)-C(1)     | 138.30(17) |
| H(29A)-C(29)-H(29B) | 107.5      | C(8)-N(2)-C(1)      | 113.78(15) |
| O(2)-C(30)-C(29)    | 108.78(15) | C(28)-N(3)-C(27)    | 106.00(16) |
| O(2)-C(30)-C(31)    | 112.82(15) | C(28)-N(4)-C(26)    | 108.12(16) |
| C(29)-C(30)-C(31)   | 111.53(15) | C(28)-N(4)-C(19)    | 138.39(17) |
| O(2)-C(30)-H(30)    | 107.8      | C(26)-N(4)-C(19)    | 113.48(15) |
| C(29)-C(30)-H(30)   | 107.8      | C(12)-O(1)-H(1A)    | 109.5      |
| C(31)-C(30)-H(30)   | 107.8      | C(30)-O(2)-H(2)     | 109.5      |
| C(30)-C(31)-C(32)   | 114.53(15) |                     |            |
| C(30)-C(31)-C(36)   | 111.57(15) |                     |            |
| C(32)-C(31)-C(36)   | 109.85(15) |                     |            |
| C(30)-C(31)-H(31)   | 106.8      |                     |            |
| C(32)-C(31)-H(31)   | 106.8      |                     |            |
| C(36)-C(31)-H(31)   | 106.8      |                     |            |

Table 4. Anisotropic displacement parameters ( $\text{\AA}^2 \times 10^3$ ) for Compound 7. The anisotropic displacement factor exponent takes the form:  $-2h^2a^2U_{11} + \dots + 2hkab^*U_{12}$

|       | U11   | U22   | U33   | U23   | U13   | U12   |
|-------|-------|-------|-------|-------|-------|-------|
| C(1)  | 23(1) | 21(1) | 16(1) | -1(1) | 5(1)  | 1(1)  |
| C(2)  | 20(1) | 22(1) | 20(1) | 0(1)  | 4(1)  | -4(1) |
| C(3)  | 28(1) | 28(1) | 23(1) | -4(1) | 6(1)  | -2(1) |
| C(4)  | 31(1) | 37(1) | 18(1) | -3(1) | 3(1)  | -7(1) |
| C(5)  | 24(1) | 35(1) | 20(1) | 6(1)  | -3(1) | -7(1) |
| C(6)  | 19(1) | 32(1) | 24(1) | 2(1)  | 1(1)  | -1(1) |
| C(7)  | 19(1) | 24(1) | 20(1) | -1(1) | 4(1)  | -4(1) |
| C(8)  | 19(1) | 23(1) | 20(1) | 2(1)  | 3(1)  | 0(1)  |
| C(9)  | 24(1) | 30(1) | 22(1) | 0(1)  | 5(1)  | 6(1)  |
| C(10) | 23(1) | 26(1) | 17(1) | 1(1)  | 5(1)  | 1(1)  |
| C(11) | 22(1) | 25(1) | 18(1) | 0(1)  | 7(1)  | 1(1)  |
| C(12) | 24(1) | 19(1) | 16(1) | 1(1)  | 7(1)  | 1(1)  |
| C(13) | 23(1) | 21(1) | 17(1) | 2(1)  | 5(1)  | 2(1)  |
| C(14) | 25(1) | 28(1) | 19(1) | -2(1) | 7(1)  | 0(1)  |
| C(15) | 25(1) | 36(1) | 23(1) | -1(1) | 10(1) | -2(1) |
| C(16) | 23(1) | 35(1) | 32(1) | 3(1)  | 7(1)  | 2(1)  |
| C(17) | 24(1) | 37(1) | 23(1) | 4(1)  | 0(1)  | -1(1) |
| C(18) | 26(1) | 34(1) | 17(1) | 3(1)  | 5(1)  | 1(1)  |
| C(19) | 20(1) | 20(1) | 15(1) | 3(1)  | 5(1)  | -1(1) |
| C(20) | 18(1) | 20(1) | 18(1) | 2(1)  | 1(1)  | 3(1)  |
| C(21) | 23(1) | 30(1) | 20(1) | 4(1)  | 4(1)  | 1(1)  |
| C(22) | 26(1) | 40(1) | 15(1) | 0(1)  | 3(1)  | 2(1)  |
| C(23) | 23(1) | 40(1) | 22(1) | -6(1) | -1(1) | -1(1) |
| C(24) | 19(1) | 32(1) | 25(1) | -1(1) | 3(1)  | -3(1) |
| C(25) | 17(1) | 24(1) | 17(1) | 3(1)  | 3(1)  | 4(1)  |
| C(26) | 17(1) | 22(1) | 20(1) | 2(1)  | 1(1)  | 2(1)  |
| C(27) | 19(1) | 29(1) | 20(1) | 4(1)  | 4(1)  | 1(1)  |
| C(28) | 20(1) | 28(1) | 17(1) | -1(1) | 2(1)  | 4(1)  |
| C(29) | 19(1) | 22(1) | 17(1) | 0(1)  | 4(1)  | -2(1) |
| C(30) | 21(1) | 17(1) | 16(1) | 1(1)  | 7(1)  | -2(1) |
| C(31) | 20(1) | 18(1) | 16(1) | -1(1) | 2(1)  | -1(1) |
| C(32) | 20(1) | 23(1) | 20(1) | 0(1)  | 5(1)  | -1(1) |
| C(33) | 20(1) | 31(1) | 24(1) | -4(1) | 7(1)  | 1(1)  |
| C(34) | 17(1) | 31(1) | 29(1) | -7(1) | 2(1)  | 2(1)  |
| C(35) | 24(1) | 31(1) | 19(1) | -4(1) | -1(1) | 4(1)  |
| C(36) | 22(1) | 25(1) | 17(1) | -2(1) | 4(1)  | -1(1) |
| N(1)  | 25(1) | 31(1) | 21(1) | -1(1) | 6(1)  | 3(1)  |
| N(2)  | 19(1) | 22(1) | 16(1) | 0(1)  | 5(1)  | 1(1)  |
| N(3)  | 21(1) | 32(1) | 16(1) | 3(1)  | 5(1)  | 3(1)  |
| N(4)  | 17(1) | 23(1) | 17(1) | 2(1)  | 3(1)  | 1(1)  |
| O(1)  | 29(1) | 21(1) | 17(1) | 1(1)  | 6(1)  | 0(1)  |



O(2) 25(1) 18(1) 16(1) -1(1) 5(1) 0(1)

---

Table 5. Hydrogen coordinates ( x 104) and isotropic displacement parameters ( $\text{\AA}^2 \times 103$ ) for Compound 7.

|        | x    | y     | z     | U(eq) |    |
|--------|------|-------|-------|-------|----|
| H(1)   | 7576 | 11587 | 9083  | 24    |    |
| H(3)   | 7617 | 10854 | 10565 | 31    |    |
| H(4)   | 8526 | 8897  | 11465 | 34    |    |
| H(5)   | 9478 | 5455  | 11255 | 32    |    |
| H(6)   | 9593 | 4050  | 10133 | 30    |    |
| H(9)   | 9376 | 3811  | 8446  | 30    |    |
| H(10)  | 7517 | 8690  | 7651  | 26    |    |
| H(11A) |      | 6615  | 6591  | 9263  | 25 |
| H(11B) |      | 6417  | 9648  | 9542  | 25 |
| H(12)  | 6242 | 8008  | 8137  | 23    |    |
| H(13)  | 5120 | 6411  | 8628  | 24    |    |
| H(14A) |      | 4851  | 11992 | 9116  | 28 |
| H(14B) |      | 5145  | 9345  | 9594  | 28 |
| H(15A) |      | 3869  | 7046  | 9265  | 33 |
| H(15B) |      | 3695  | 10104 | 9561  | 33 |
| H(16A) |      | 2787  | 9171  | 8530  | 35 |
| H(16B) |      | 3345  | 11903 | 8447  | 35 |
| H(17A) |      | 3354  | 9072  | 7477  | 34 |
| H(17B) |      | 3635  | 6374  | 7941  | 34 |
| H(18A) |      | 4640  | 11254 | 7795  | 30 |
| H(18B) |      | 4800  | 8169  | 7508  | 30 |
| H(19)  | 7424 | 4810  | 5396  | 22    |    |
| H(21)  | 7488 | 2409  | 4040  | 29    |    |
| H(22)  | 6635 | -355  | 3246  | 33    |    |
| H(23)  | 5587 | -3107 | 3592  | 35    |    |
| H(24)  | 5377 | -3235 | 4744  | 31    |    |
| H(27)  | 5501 | -1839 | 6389  | 27    |    |
| H(28)  | 7255 | 3855  | 6931  | 26    |    |
| H(29A) |      | 8302  | -487  | 5550  | 23 |
| H(29B) |      | 8631  | 2361  | 5247  | 23 |
| H(30)  | 8506 | 1301  | 6653  | 21    |    |
| H(31)  | 9667 | -745  | 6232  | 21    |    |
| H(32A) |      | 9967  | 2662  | 5429  | 24 |
| H(32B) |      | 10251 | 4859  | 6033  | 24 |
| H(33A) |      | 11438 | 2704  | 5705  | 30 |
| H(33B) |      | 11073 | -370  | 5824  | 30 |
| H(34A) |      | 12055 | 741   | 6773  | 31 |
| H(34B) |      | 11592 | 3654  | 6886  | 31 |

|        |       |       |      |    |
|--------|-------|-------|------|----|
| H(35A) | 11229 | 346   | 7680 | 30 |
| H(35B) | 10940 | -1871 | 7081 | 30 |
| H(36A) | 10124 | 3380  | 7278 | 26 |
| H(36B) | 9759  | 318   | 7409 | 26 |
| H(1A)  | 6182  | 12193 | 7890 | 33 |
| H(2)   | 8697  | 5566  | 6832 | 29 |

---

---

### **Experimental data for SC-XRD on Compound 8**

X-ray quality crystals were grown from a saturated 1,2-dichloroethane/ethanol/methanol solution followed by the slow vapor diffusion of diethyl ether to deposit the crystal diffracted. A colorless rod 0.080 x 0.050 x 0.050 mm in size was mounted on a Cryoloop with Paratone oil. Data were collected in a nitrogen gas stream at 90(2) K using phi and omega scans. Crystal-to-detector distance was 40 mm and exposure time was 0.05 seconds per frame using a scan width of 0.5°. Data collection was 99.9% complete to 67.000° in theta. A total of 17678 reflections were collected covering the indices,  $-8 \leq h \leq 8$ ,  $-11 \leq k \leq 11$ ,  $-18 \leq l \leq 18$ . 6643 reflections were found to be symmetry independent, with an  $R_{\text{int}}$  of 0.0255. Indexing and unit cell refinement indicated a primitive, triclinic lattice. The space group was found to be P 1 (No. 1). The data were integrated and scaled using CrysAlisPro 1.171.40.35a. Solution by iterative methods (SHELXT-2014) produced a complete heavy-atom phasing model. All non-hydrogen atoms were refined anisotropically by full-matrix least-squares (SHELXL-2018). All hydrogen atoms were placed using a riding model. Their positions were constrained relative to their parent atom using the appropriate HFIX command in SHELXL-2018. Absolute stereochemistry was unambiguously determined to be *R* at C11 and C30, and *S* at C1, C13, C20, and C32, respectively.

Table 1. Crystal data and structure refinement for Compound 8.

X-ray ID       Compound 8  
Sample/notebook ID   Compound 8  
Empirical formula    C<sub>38</sub> H<sub>55</sub> Cl N<sub>4</sub> O<sub>5</sub>  
Formula weight       683.31  
Temperature        90(2) K  
Wavelength         1.54184 Å  
Crystal system       Triclinic  
Space group         P 1  
Unit cell dimensions   a = 6.81630(10) Å    alpha = 73.148(2)°.  
                      b = 9.5313(2) Å       beta = 77.8340(10)°.  
                      c = 15.3468(2) Å     gamma = 89.575(2)°.  
Volume             931.27(3) Å<sup>3</sup>  
Z                    1  
Density (calculated)  1.218 Mg/m<sup>3</sup>  
Absorption coefficient  1.278 mm<sup>-1</sup>  
F(000) 368  
Crystal size        0.080 x 0.050 x 0.050 mm<sup>3</sup>  
Theta range for data collection    3.083 to 75.128°.  
Index ranges        -8<=h<=8, -11<=k<=11, -18<=l<=18  
Reflections collected  17678  
Independent reflections    6643 [R(int) = 0.0255]  
Completeness to theta = 67.000°    99.9 %  
Absorption correction Semi-empirical from equivalents  
Max. and min. transmission  1.00000 and 0.83098  
Refinement method    Full-matrix least-squares on F<sup>2</sup>  
Data / restraints / parameters  6643 / 3 / 437  
Goodness-of-fit on F<sup>2</sup> 1.053  
Final R indices [I>2sigma(I)] R1 = 0.0420, wR2 = 0.1122  
R indices (all data)   R1 = 0.0429, wR2 = 0.1136  
Absolute structure parameter  0.050(7)  
Extinction coefficient n/a  
Largest diff. peak and hole   0.476 and -0.486 e.Å<sup>-3</sup>

Table 2. Atomic coordinates (  $\times 10^4$ ) and equivalent isotropic displacement parameters ( $\text{\AA}^2 \times 10^3$ ) for Compound 8.  $U(\text{eq})$  is defined as one third of the trace of the orthogonalized  $U_{ij}$  tensor.

|       | x        | y       | z        | $U(\text{eq})$ |
|-------|----------|---------|----------|----------------|
| C(1)  | 10695(4) |         | 2562(3)  | 6744(2) 24(1)  |
| C(2)  | 11901(4) |         | 1210(3)  | 6988(2) 24(1)  |
| C(3)  | 13464(4) |         | 981(4)   | 7459(2) 27(1)  |
| C(4)  | 14362(5) |         | -362(4)  | 7594(2) 31(1)  |
| C(5)  | 13764(5) |         | -1440(4) | 7247(2) 31(1)  |
| C(6)  | 12200(5) |         | -1220(4) | 6769(2) 29(1)  |
| C(7)  | 11279(4) |         | 99(3)    | 6656(2) 25(1)  |
| C(8)  | 9665(4)  |         | 651(3)   | 6183(2) 24(1)  |
| C(9)  | 8311(4)  |         | 361(4)   | 5702(2) 27(1)  |
| C(10) | 7932(4)  |         | 2609(4)  | 5769(2) 26(1)  |
| C(11) | 9384(4)  |         | 3008(3)  | 7562(2) 24(1)  |
| C(12) | 8280(5)  |         | 1670(4)  | 8321(2) 28(1)  |
| C(13) | 10625(4) |         | 3935(3)  | 7944(2) 24(1)  |
| C(14) | 9380(4)  |         | 4494(3)  | 8724(2) 24(1)  |
| C(15) | 7691(5)  |         | 5457(4)  | 8416(2) 28(1)  |
| C(16) | 6549(5)  |         | 6049(4)  | 9192(2) 34(1)  |
| C(17) | 7963(5)  |         | 6908(4)  | 9522(2) 36(1)  |
| C(18) | 9613(5)  |         | 5942(4)  | 9858(2) 35(1)  |
| C(19) | 10759(5) |         | 5320(4)  | 9099(2) 30(1)  |
| C(20) | 951(4)   | 4488(3) |          | 3249(2) 24(1)  |
| C(21) | -306(4)  | 3412(3) |          | 2995(2) 24(1)  |
| C(22) | -1855(5) |         | 3678(4)  | 2514(2) 28(1)  |
| C(23) | -2779(5) |         | 2498(4)  | 2367(2) 32(1)  |
| C(24) | -2243(5) |         | 1067(4)  | 2714(2) 32(1)  |
| C(25) | -727(5)  | 788(4)  |          | 3206(2) 29(1)  |
| C(26) | 246(4)   | 1966(4) |          | 3326(2) 25(1)  |
| C(27) | 1875(4)  |         | 2005(3)  | 3805(2) 25(1)  |
| C(28) | 3172(5)  |         | 1196(4)  | 4284(2) 28(1)  |
| C(29) | 3709(4)  |         | 3509(4)  | 4209(2) 27(1)  |
| C(30) | 2288(4)  |         | 5682(3)  | 2436(2) 26(1)  |
| C(31) | 3301(5)  |         | 5063(4)  | 1653(2) 30(1)  |
| C(32) | 1087(4)  |         | 7018(3)  | 2087(2) 26(1)  |
| C(33) | 2310(4)  |         | 8268(4)  | 1285(2) 26(1)  |
| C(34) | 4039(5)  |         | 8940(4)  | 1566(2) 30(1)  |
| C(35) | 5139(5)  |         | 10255(4) | 779(2) 34(1)   |
| C(36) | 3701(6)  |         | 11424(4) | 470(2) 36(1)   |
| C(37) | 2024(6)  |         | 10786(4) | 151(2) 36(1)   |
| C(38) | 909(5)   | 9465(4) |          | 920(2) 31(1)   |

|       |                |         |         |       |
|-------|----------------|---------|---------|-------|
| N(1)  | 7260(4)        | 1609(3) | 5449(2) | 27(1) |
| N(2)  | 9390(4)        | 2067(3) | 6222(2) | 24(1) |
| N(3)  | 4287(4)        | 2162(3) | 4530(2) | 27(1) |
| N(4)  | 2238(4)        | 3445(3) | 3765(2) | 24(1) |
| O(1)  | 11712(3)       | 5124(2) | 7208(2) | 30(1) |
| O(2)  | 286(4) 7600(3) | 2838(2) | 37(1)   |       |
| O(3)  | 1980(5)        | 7781(4) | 4272(3) | 64(1) |
| O(4)  | -594(5)6502(4) | 5929(2) | 68(1)   |       |
| O(5)  | -4382(4)       | 5505(4) | 6107(2) | 57(1) |
| Cl(1) | -3796(1)       | 6703(1) | 3944(1) | 58(1) |

---

—

Table 3. Bond lengths [ $\text{\AA}$ ] and angles [ $^\circ$ ] for Compound 8.

|              |          |              |          |
|--------------|----------|--------------|----------|
| C(1)-N(2)    | 1.477(4) | C(18)-H(18A) | 0.9900   |
| C(1)-C(2)    | 1.520(4) | C(18)-H(18B) | 0.9900   |
| C(1)-C(11)   | 1.544(4) | C(19)-H(19A) | 0.9900   |
| C(1)-H(1)    | 1.0000   | C(19)-H(19B) | 0.9900   |
| C(2)-C(3)    | 1.392(4) | C(20)-N(4)   | 1.486(4) |
| C(2)-C(7)    | 1.403(4) | C(20)-C(21)  | 1.525(4) |
| C(3)-C(4)    | 1.394(5) | C(20)-C(30)  | 1.547(4) |
| C(3)-H(3)    | 0.9500   | C(20)-H(20)  | 1.0000   |
| C(4)-C(5)    | 1.386(5) | C(21)-C(22)  | 1.392(4) |
| C(4)-H(4)    | 0.9500   | C(21)-C(26)  | 1.402(4) |
| C(5)-C(6)    | 1.399(4) | C(22)-C(23)  | 1.389(5) |
| C(5)-H(5)    | 0.9500   | C(22)-H(22)  | 0.9500   |
| C(6)-C(7)    | 1.384(4) | C(23)-C(24)  | 1.390(5) |
| C(6)-H(6)    | 0.9500   | C(23)-H(23)  | 0.9500   |
| C(7)-C(8)    | 1.456(4) | C(24)-C(25)  | 1.385(4) |
| C(8)-C(9)    | 1.372(4) | C(24)-H(24)  | 0.9500   |
| C(8)-N(2)    | 1.378(4) | C(25)-C(26)  | 1.385(4) |
| C(9)-N(1)    | 1.384(4) | C(25)-H(25)  | 0.9500   |
| C(9)-H(9)    | 0.9500   | C(26)-C(27)  | 1.460(4) |
| C(10)-N(1)   | 1.316(4) | C(27)-C(28)  | 1.360(4) |
| C(10)-N(2)   | 1.347(4) | C(27)-N(4)   | 1.378(4) |
| C(10)-H(10)  | 0.9500   | C(28)-N(3)   | 1.379(4) |
| C(11)-C(12)  | 1.527(4) | C(28)-H(28)  | 0.9500   |
| C(11)-C(13)  | 1.536(4) | C(29)-N(3)   | 1.325(4) |
| C(11)-H(11)  | 1.0000   | C(29)-N(4)   | 1.337(4) |
| C(12)-H(12A) | 0.9800   | C(29)-H(29)  | 0.9500   |
| C(12)-H(12B) | 0.9800   | C(30)-C(31)  | 1.525(4) |
| C(12)-H(12C) | 0.9800   | C(30)-C(32)  | 1.534(4) |
| C(13)-O(1)   | 1.423(4) | C(30)-H(30)  | 1.0000   |
| C(13)-C(14)  | 1.541(4) | C(31)-H(31A) | 0.9800   |
| C(13)-H(13)  | 1.0000   | C(31)-H(31B) | 0.9800   |
| C(14)-C(19)  | 1.528(4) | C(31)-H(31C) | 0.9800   |
| C(14)-C(15)  | 1.534(4) | C(32)-O(2)   | 1.426(3) |
| C(14)-H(14)  | 1.0000   | C(32)-C(33)  | 1.537(4) |
| C(15)-C(16)  | 1.528(4) | C(32)-H(32)  | 1.0000   |
| C(15)-H(15A) | 0.9900   | C(33)-C(38)  | 1.538(4) |
| C(15)-H(15B) | 0.9900   | C(33)-C(34)  | 1.539(4) |
| C(16)-C(17)  | 1.522(5) | C(33)-H(33)  | 1.0000   |
| C(16)-H(16A) | 0.9900   | C(34)-C(35)  | 1.531(5) |
| C(16)-H(16B) | 0.9900   | C(34)-H(34A) | 0.9900   |
| C(17)-C(18)  | 1.527(5) | C(34)-H(34B) | 0.9900   |
| C(17)-H(17A) | 0.9900   | C(35)-C(36)  | 1.517(5) |
| C(17)-H(17B) | 0.9900   | C(35)-H(35A) | 0.9900   |
| C(18)-C(19)  | 1.526(4) | C(35)-H(35B) | 0.9900   |



C(36)-C(37) 1.528(5)  
C(36)-H(36A) 0.9900  
C(36)-H(36B) 0.9900  
C(37)-C(38) 1.526(5)  
C(37)-H(37A) 0.9900  
C(37)-H(37B) 0.9900  
C(38)-H(38A) 0.9900  
C(38)-H(38B) 0.9900  
N(3)-H(3A) 0.8800

O(1)-H(1A) 0.8400  
O(2)-H(2) 0.8400  
O(3)-H(3X) 0.8501  
O(3)-H(3Y) 0.8500  
O(4)-H(4X) 0.8411  
O(4)-H(4Y) 0.8444  
O(5)-H(5X) 0.8500  
O(5)-H(5Y) 0.8501

N(2)-C(1)-C(2) 99.7(2)  
N(2)-C(1)-C(11) 109.6(2)  
C(2)-C(1)-C(11) 117.3(2)  
N(2)-C(1)-H(1) 109.9  
C(2)-C(1)-H(1) 109.9  
C(11)-C(1)-H(1) 109.9  
C(3)-C(2)-C(7) 119.6(3)  
C(3)-C(2)-C(1) 129.0(3)  
C(7)-C(2)-C(1) 111.4(2)  
C(2)-C(3)-C(4) 118.6(3)  
C(2)-C(3)-H(3) 120.7  
C(4)-C(3)-H(3) 120.7  
C(5)-C(4)-C(3) 121.3(3)  
C(5)-C(4)-H(4) 119.4  
C(3)-C(4)-H(4) 119.4  
C(4)-C(5)-C(6) 120.6(3)  
C(4)-C(5)-H(5) 119.7  
C(6)-C(5)-H(5) 119.7  
C(7)-C(6)-C(5) 117.9(3)  
C(7)-C(6)-H(6) 121.0  
C(5)-C(6)-H(6) 121.0  
C(6)-C(7)-C(2) 121.9(3)  
C(6)-C(7)-C(8) 130.5(3)  
C(2)-C(7)-C(8) 107.5(3)  
C(9)-C(8)-N(2) 106.2(3)  
C(9)-C(8)-C(7) 146.4(3)  
N(2)-C(8)-C(7) 107.4(2)  
C(8)-C(9)-N(1) 107.7(3)  
C(8)-C(9)-H(9) 126.2  
N(1)-C(9)-H(9) 126.2  
N(1)-C(10)-N(2) 109.7(3)  
N(1)-C(10)-H(10) 125.2  
N(2)-C(10)-H(10) 125.2  
C(12)-C(11)-C(13) 112.5(2)  
C(12)-C(11)-C(1) 111.4(2)  
C(13)-C(11)-C(1) 111.2(2)

C(12)-C(11)-H(11) 107.2  
C(13)-C(11)-H(11) 107.2  
C(1)-C(11)-H(11) 107.2  
C(11)-C(12)-H(12A) 109.5  
C(11)-C(12)-H(12B) 109.5  
H(12A)-C(12)-H(12B) 109.5  
C(11)-C(12)-H(12C) 109.5  
H(12A)-C(12)-H(12C) 109.5  
H(12B)-C(12)-H(12C) 109.5  
O(1)-C(13)-C(11) 110.7(2)  
O(1)-C(13)-C(14) 110.7(2)  
C(11)-C(13)-C(14) 113.9(2)  
O(1)-C(13)-H(13) 107.1  
C(11)-C(13)-H(13) 107.1  
C(14)-C(13)-H(13) 107.1  
C(19)-C(14)-C(15) 110.5(2)  
C(19)-C(14)-C(13) 110.0(2)  
C(15)-C(14)-C(13) 113.1(2)  
C(19)-C(14)-H(14) 107.7  
C(15)-C(14)-H(14) 107.7  
C(13)-C(14)-H(14) 107.7  
C(16)-C(15)-C(14) 111.7(2)  
C(16)-C(15)-H(15A) 109.3  
C(14)-C(15)-H(15A) 109.3  
C(16)-C(15)-H(15B) 109.3  
C(14)-C(15)-H(15B) 109.3  
H(15A)-C(15)-H(15B) 107.9  
C(17)-C(16)-C(15) 111.2(3)  
C(17)-C(16)-H(16A) 109.4  
C(15)-C(16)-H(16A) 109.4  
C(17)-C(16)-H(16B) 109.4  
C(15)-C(16)-H(16B) 109.4  
H(16A)-C(16)-H(16B) 108.0  
C(16)-C(17)-C(18) 110.2(3)  
C(16)-C(17)-H(17A) 109.6  
C(18)-C(17)-H(17A) 109.6

|                     |          |                     |          |
|---------------------|----------|---------------------|----------|
| C(16)-C(17)-H(17B)  | 109.6    | N(3)-C(29)-H(29)    | 125.8    |
| C(18)-C(17)-H(17B)  | 109.6    | N(4)-C(29)-H(29)    | 125.8    |
| H(17A)-C(17)-H(17B) | 108.1    | C(31)-C(30)-C(32)   | 112.3(2) |
| C(19)-C(18)-C(17)   | 111.3(3) | C(31)-C(30)-C(20)   | 111.5(3) |
| C(19)-C(18)-H(18A)  | 109.4    | C(32)-C(30)-C(20)   | 111.0(2) |
| C(17)-C(18)-H(18A)  | 109.4    | C(31)-C(30)-H(30)   | 107.3    |
| C(19)-C(18)-H(18B)  | 109.4    | C(32)-C(30)-H(30)   | 107.3    |
| C(17)-C(18)-H(18B)  | 109.4    | C(20)-C(30)-H(30)   | 107.3    |
| H(18A)-C(18)-H(18B) | 108.0    | C(30)-C(31)-H(31A)  | 109.5    |
| C(18)-C(19)-C(14)   | 112.8(3) | C(30)-C(31)-H(31B)  | 109.5    |
| C(18)-C(19)-H(19A)  | 109.0    | H(31A)-C(31)-H(31B) | 109.5    |
| C(14)-C(19)-H(19A)  | 109.0    | C(30)-C(31)-H(31C)  | 109.5    |
| C(18)-C(19)-H(19B)  | 109.0    | H(31A)-C(31)-H(31C) | 109.5    |
| C(14)-C(19)-H(19B)  | 109.0    | H(31B)-C(31)-H(31C) | 109.5    |
| H(19A)-C(19)-H(19B) | 107.8    | O(2)-C(32)-C(30)    | 109.5(2) |
| N(4)-C(20)-C(21)    | 99.7(2)  | O(2)-C(32)-C(33)    | 107.8(2) |
| N(4)-C(20)-C(30)    | 109.8(2) | C(30)-C(32)-C(33)   | 114.4(2) |
| C(21)-C(20)-C(30)   | 117.3(2) | O(2)-C(32)-H(32)    | 108.3    |
| N(4)-C(20)-H(20)    | 109.9    | C(30)-C(32)-H(32)   | 108.3    |
| C(21)-C(20)-H(20)   | 109.9    | C(33)-C(32)-H(32)   | 108.3    |
| C(30)-C(20)-H(20)   | 109.9    | C(32)-C(33)-C(38)   | 109.8(2) |
| C(22)-C(21)-C(26)   | 119.1(3) | C(32)-C(33)-C(34)   | 112.9(2) |
| C(22)-C(21)-C(20)   | 129.5(3) | C(38)-C(33)-C(34)   | 110.2(3) |
| C(26)-C(21)-C(20)   | 111.4(2) | C(32)-C(33)-H(33)   | 107.9    |
| C(23)-C(22)-C(21)   | 118.6(3) | C(38)-C(33)-H(33)   | 107.9    |
| C(23)-C(22)-H(22)   | 120.7    | C(34)-C(33)-H(33)   | 107.9    |
| C(21)-C(22)-H(22)   | 120.7    | C(35)-C(34)-C(33)   | 112.0(3) |
| C(22)-C(23)-C(24)   | 121.7(3) | C(35)-C(34)-H(34A)  | 109.2    |
| C(22)-C(23)-H(23)   | 119.1    | C(33)-C(34)-H(34A)  | 109.2    |
| C(24)-C(23)-H(23)   | 119.1    | C(35)-C(34)-H(34B)  | 109.2    |
| C(25)-C(24)-C(23)   | 120.1(3) | C(33)-C(34)-H(34B)  | 109.2    |
| C(25)-C(24)-H(24)   | 120.0    | H(34A)-C(34)-H(34B) | 107.9    |
| C(23)-C(24)-H(24)   | 120.0    | C(36)-C(35)-C(34)   | 111.3(3) |
| C(26)-C(25)-C(24)   | 118.4(3) | C(36)-C(35)-H(35A)  | 109.4    |
| C(26)-C(25)-H(25)   | 120.8    | C(34)-C(35)-H(35A)  | 109.4    |
| C(24)-C(25)-H(25)   | 120.8    | C(36)-C(35)-H(35B)  | 109.4    |
| C(25)-C(26)-C(21)   | 122.0(3) | C(34)-C(35)-H(35B)  | 109.4    |
| C(25)-C(26)-C(27)   | 130.4(3) | H(35A)-C(35)-H(35B) | 108.0    |
| C(21)-C(26)-C(27)   | 107.6(3) | C(35)-C(36)-C(37)   | 110.4(3) |
| C(28)-C(27)-N(4)    | 106.8(3) | C(35)-C(36)-H(36A)  | 109.6    |
| C(28)-C(27)-C(26)   | 145.6(3) | C(37)-C(36)-H(36A)  | 109.6    |
| N(4)-C(27)-C(26)    | 107.5(3) | C(35)-C(36)-H(36B)  | 109.6    |
| C(27)-C(28)-N(3)    | 106.8(3) | C(37)-C(36)-H(36B)  | 109.6    |
| C(27)-C(28)-H(28)   | 126.6    | H(36A)-C(36)-H(36B) | 108.1    |
| N(3)-C(28)-H(28)    | 126.6    | C(38)-C(37)-C(36)   | 111.0(3) |
| N(3)-C(29)-N(4)     | 108.4(3) | C(38)-C(37)-H(37A)  | 109.4    |

|                     |          |                  |          |
|---------------------|----------|------------------|----------|
| C(36)-C(37)-H(37A)  | 109.4    | C(8)-N(2)-C(1)   | 114.0(2) |
| C(38)-C(37)-H(37B)  | 109.4    | C(29)-N(3)-C(28) | 109.2(3) |
| C(36)-C(37)-H(37B)  | 109.4    | C(29)-N(3)-H(3A) | 125.4    |
| H(37A)-C(37)-H(37B) | 108.0    | C(28)-N(3)-H(3A) | 125.4    |
| C(37)-C(38)-C(33)   | 113.1(3) | C(29)-N(4)-C(27) | 108.8(3) |
| C(37)-C(38)-H(38A)  | 109.0    | C(29)-N(4)-C(20) | 137.4(3) |
| C(33)-C(38)-H(38A)  | 109.0    | C(27)-N(4)-C(20) | 113.8(2) |
| C(37)-C(38)-H(38B)  | 109.0    | C(13)-O(1)-H(1A) | 109.5    |
| C(33)-C(38)-H(38B)  | 109.0    | C(32)-O(2)-H(2)  | 109.5    |
| H(38A)-C(38)-H(38B) | 107.8    | H(3X)-O(3)-H(3Y) | 107.7    |
| C(10)-N(1)-C(9)     | 108.1(2) | H(4X)-O(4)-H(4Y) | 109.3    |
| C(10)-N(2)-C(8)     | 108.3(2) | H(5X)-O(5)-H(5Y) | 107.7    |
| C(10)-N(2)-C(1)     | 137.7(3) |                  |          |

---

Symmetry transformations used to generate equivalent atoms:

Table 4. Anisotropic displacement parameters ( $\text{\AA}^2 \times 10^3$ ) for G03081798.1-1. The anisotropic displacement factor exponent takes the form:  $-2 \sum [h^2 a^* 2U_{11} + \dots + 2 h k a^* b^* U_{12}]$

|       | U11   | U22   | U33   | U23    | U13    | U12   |
|-------|-------|-------|-------|--------|--------|-------|
| C(1)  | 24(1) | 28(2) | 21(1) | -6(1)  | -6(1)  | -2(1) |
| C(2)  | 21(1) | 29(2) | 20(1) | -5(1)  | -2(1)  | -2(1) |
| C(3)  | 24(1) | 32(2) | 26(2) | -8(1)  | -5(1)  | -3(1) |
| C(4)  | 24(1) | 37(2) | 31(2) | -5(1)  | -9(1)  | 0(1)  |
| C(5)  | 26(2) | 29(2) | 33(2) | -3(1)  | -7(1)  | 2(1)  |
| C(6)  | 29(2) | 27(2) | 29(2) | -5(1)  | -6(1)  | -1(1) |
| C(7)  | 22(1) | 30(2) | 20(1) | -5(1)  | -5(1)  | -2(1) |
| C(8)  | 23(1) | 26(2) | 22(1) | -7(1)  | -4(1)  | 0(1)  |
| C(9)  | 26(1) | 30(2) | 25(2) | -9(1)  | -5(1)  | 0(1)  |
| C(10) | 25(1) | 33(2) | 19(1) | -6(1)  | -4(1)  | 2(1)  |
| C(11) | 25(1) | 27(2) | 22(1) | -8(1)  | -5(1)  | 0(1)  |
| C(12) | 27(1) | 33(2) | 24(1) | -10(1) | 0(1)   | -7(1) |
| C(13) | 24(1) | 26(2) | 22(1) | -6(1)  | -5(1)  | -2(1) |
| C(14) | 29(2) | 26(2) | 20(1) | -7(1)  | -8(1)  | 0(1)  |
| C(15) | 30(2) | 33(2) | 23(2) | -9(1)  | -7(1)  | 4(1)  |
| C(16) | 34(2) | 38(2) | 31(2) | -14(2) | -4(1)  | 4(1)  |
| C(17) | 44(2) | 34(2) | 30(2) | -14(2) | -4(1)  | 0(2)  |
| C(18) | 45(2) | 35(2) | 28(2) | -12(2) | -11(1) | -2(2) |
| C(19) | 36(2) | 32(2) | 27(2) | -10(1) | -13(1) | 0(1)  |
| C(20) | 23(1) | 27(2) | 22(1) | -7(1)  | -5(1)  | 6(1)  |
| C(21) | 20(1) | 33(2) | 19(1) | -8(1)  | -3(1)  | 3(1)  |
| C(22) | 24(1) | 36(2) | 26(2) | -9(1)  | -7(1)  | 9(1)  |
| C(23) | 24(2) | 42(2) | 32(2) | -14(2) | -10(1) | 8(1)  |
| C(24) | 28(2) | 42(2) | 33(2) | -21(2) | -8(1)  | 5(1)  |
| C(25) | 28(2) | 33(2) | 31(2) | -14(1) | -9(1)  | 7(1)  |
| C(26) | 23(1) | 31(2) | 20(1) | -8(1)  | -3(1)  | 4(1)  |
| C(27) | 24(1) | 27(2) | 20(1) | -4(1)  | -3(1)  | 1(1)  |
| C(28) | 26(1) | 31(2) | 24(2) | -5(1)  | -6(1)  | 1(1)  |
| C(29) | 26(1) | 33(2) | 22(1) | -7(1)  | -6(1)  | 0(1)  |
| C(30) | 25(1) | 29(2) | 21(1) | -6(1)  | -3(1)  | 4(1)  |
| C(31) | 29(2) | 29(2) | 27(2) | -4(1)  | 2(1)   | 11(1) |
| C(32) | 27(1) | 30(2) | 21(1) | -9(1)  | -4(1)  | 7(1)  |
| C(33) | 27(2) | 31(2) | 19(1) | -6(1)  | -5(1)  | 6(1)  |
| C(34) | 31(2) | 32(2) | 25(2) | -4(1)  | -5(1)  | 0(1)  |
| C(35) | 34(2) | 36(2) | 28(2) | -5(1)  | -2(1)  | -3(1) |
| C(36) | 43(2) | 29(2) | 30(2) | -5(1)  | 0(1)   | 2(1)  |
| C(37) | 46(2) | 33(2) | 27(2) | -5(1)  | -11(1) | 11(2) |
| C(38) | 33(2) | 32(2) | 30(2) | -8(1)  | -9(1)  | 7(1)  |
| N(1)  | 25(1) | 33(1) | 24(1) | -7(1)  | -7(1)  | 2(1)  |
| N(2)  | 24(1) | 29(1) | 21(1) | -8(1)  | -6(1)  | 0(1)  |
| N(3)  | 24(1) | 34(2) | 23(1) | -5(1)  | -7(1)  | 0(1)  |

|       |       |       |       |        |        |        |
|-------|-------|-------|-------|--------|--------|--------|
| N(4)  | 25(1) | 28(1) | 19(1) | -5(1)  | -5(1)  | 2(1)   |
| O(1)  | 30(1) | 30(1) | 27(1) | -8(1)  | -2(1)  | -7(1)  |
| O(2)  | 48(1) | 31(1) | 28(1) | -12(1) | 6(1)   | 8(1)   |
| O(3)  | 56(2) | 75(2) | 75(2) | -39(2) | -18(2) | 10(2)  |
| O(4)  | 43(2) | 59(2) | 62(2) | 31(2)  | 7(1)   | -11(1) |
| O(5)  | 34(1) | 60(2) | 66(2) | -13(2) | 4(1)   | 9(1)   |
| Cl(1) | 38(1) | 68(1) | 69(1) | -31(1) | 2(1)   | -8(1)  |

---

Table 5. Hydrogen coordinates (  $\times 10^4$ ) and isotropic displacement parameters ( $\text{\AA}^2 \times 10^3$ ) for Compound 8.

|        | x     | y     | z    | U(eq) |    |
|--------|-------|-------|------|-------|----|
| H(1)   | 11603 | 3417  | 6320 | 29    |    |
| H(3)   | 13910 | 1724  | 7684 | 33    |    |
| H(4)   | 15405 | -541  | 7931 | 37    |    |
| H(5)   | 14422 | -2336 | 7335 | 37    |    |
| H(6)   | 11784 | -1954 | 6529 | 35    |    |
| H(9)   | 8128  | -534  | 5566 | 32    |    |
| H(10)  | 7459  | 3569  | 5692 | 31    |    |
| H(11)  | 8338  | 3642  | 7308 | 29    |    |
| H(12A) |       | 9213  | 1157 | 8695  | 42 |
| H(12B) |       | 7755  | 1006 | 8031  | 42 |
| H(12C) |       | 7164  | 1989 | 8723  | 42 |
| H(13)  | 11638 | 3289  | 8218 | 29    |    |
| H(14)  | 8743  | 3617  | 9247 | 29    |    |
| H(15A) |       | 8272  | 6290 | 7863  | 34 |
| H(15B) |       | 6741  | 4872 | 8233  | 34 |
| H(16A) |       | 5512  | 6696 | 8959  | 41 |
| H(16B) |       | 5861  | 5221 | 9723  | 41 |
| H(17A) |       | 7196  | 7251 | 10038 | 43 |
| H(17B) |       | 8576  | 7781 | 9005  | 43 |
| H(18A) |       | 10561 | 6529 | 10040 | 41 |
| H(18B) |       | 9005  | 5124 | 10415 | 41 |
| H(19A) |       | 11747 | 4645 | 9355  | 36 |
| H(19B) |       | 11514 | 6135 | 8577  | 36 |
| H(20)  | 70    | 4956  | 3681 | 29    |    |
| H(22)  | -2271 | 4645  | 2292 | 34    |    |
| H(23)  | -3803 | 2675  | 2020 | 38    |    |
| H(24)  | -2918 | 278   | 2613 | 38    |    |
| H(25)  | -364  | -187  | 3455 | 35    |    |
| H(28)  | 3287  | 165   | 4422 | 33    |    |
| H(29)  | 4249  | 4374  | 4282 | 32    |    |
| H(30)  | 3376  | 6020  | 2687 | 31    |    |
| H(31A) |       | 2332  | 4971 | 1280  | 46 |
| H(31B) |       | 3781  | 4094 | 1921  | 46 |
| H(31C) |       | 4442  | 5725 | 1254  | 46 |
| H(32)  | -60   | 6686  | 1868 | 31    |    |
| H(33)  | 2909  | 7855  | 766  | 31    |    |
| H(34A) |       | 3493  | 9259 | 2124  | 36 |
| H(34B) |       | 5007  | 8182 | 1732  | 36 |

|        |       |       |      |    |
|--------|-------|-------|------|----|
| H(35A) | 6196  | 10680 | 997  | 41 |
| H(35B) | 5800  | 9919  | 241  | 41 |
| H(36A) | 4445  | 12247 | -49  | 43 |
| H(36B) | 3111  | 11813 | 994  | 43 |
| H(37A) | 1066  | 11549 | -20  | 43 |
| H(37B) | 2607  | 10482 | -409 | 43 |
| H(38A) | -99   | 9035  | 676  | 38 |
| H(38B) | 178   | 9802  | 1445 | 38 |
| H(3A)  | 5233  | 1921  | 4850 | 33 |
| H(1A)  | 10958 | 5519  | 6849 | 45 |
| H(2)   | -893  | 7246  | 3087 | 56 |
| H(3X)  | 1691  | 7720  | 3771 | 77 |
| H(3Y)  | 3246  | 7742  | 4209 | 77 |
| H(4X)  | -1575 | 6110  | 5816 | 82 |
| H(4Y)  | 272   | 6849  | 5428 | 82 |
| H(5X)  | -5520 | 5496  | 6466 | 68 |
| H(5Y)  | -4232 | 6299  | 5662 | 68 |

### **Experimental data for SC-XRD on Compound 9**

X-ray quality crystals were grown from a saturated 1,2-dichloroethane/ethanol/methanol solution followed by the slow vapor diffusion of heptane to deposit the crystal diffracted. A colorless rod 0.070 x 0.030 x 0.030 mm in size was mounted on a Cryoloop with Paratone oil. Data were collected in a nitrogen gas stream at 90(2) K using phi and omega scans. Crystal-to-detector distance was 40 mm and exposure time was 0.05 seconds per frame using a scan width of 0.5°. Data collection was 100.0% complete to 67.000° in theta. A total of 13517 reflections were collected covering the indices,  $-13 \leq h \leq 13$ ,  $-5 \leq k \leq 5$ ,  $-17 \leq l \leq 17$ . 2595 reflections were found to be symmetry independent, with an  $R_{\text{int}}$  of 0.0389. Indexing and unit cell refinement indicated a primitive, monoclinic lattice. The space group was found to be P 21 (No. 4). The data were integrated and scaled using CrysAlisPro 1.171.40.35a. Solution by iterative methods (SHELXT-2014) produced a complete heavy-atom phasing model. All non-hydrogen atoms were refined anisotropically by full-matrix least-squares (SHELXL-2018). All hydrogen atoms were placed using a riding model. Their positions were constrained relative to their parent atom using the appropriate HFIX command in SHELXL-2018. Absolute stereochemistry was unambiguously determined to be *R* at C11 and C12, and *S* at C1, respectively.



Table 1. Crystal data and structure refinement for Compound 9.

X-ray ID      Compound 9  
Sample/notebook ID    Compound 9  
Empirical formula    C<sub>16</sub>H<sub>18</sub>N<sub>2</sub>O  
Formula weight      254.32  
Temperature    90(2) K  
Wavelength    1.54184 Å  
Crystal system      Monoclinic  
Space group    P 21  
Unit cell dimensions    a = 10.7972(5) Å      alpha = 90°.  
                              b = 4.73210(10) Å      beta = 111.019(5)°.  
                              c = 13.9575(6) Å      gamma = 90°.  
Volume          665.69(5) Å<sup>3</sup>  
Z                2  
Density (calculated)    1.269 Mg/m<sup>3</sup>  
Absorption coefficient    0.631 mm<sup>-1</sup>  
F(000) 272  
Crystal size    0.070 x 0.030 x 0.030 mm<sup>3</sup>  
Theta range for data collection    3.392 to 74.741°.  
Index ranges    -13<=h<=13, -5<=k<=5, -17<=l<=17  
Reflections collected    13517  
Independent reflections    2595 [R(int) = 0.0389]  
Completeness to theta = 67.000°    100.0 %  
Absorption correction Gaussian  
Max. and min. transmission    1.000 and 0.626  
Refinement method    Full-matrix least-squares on F<sup>2</sup>  
Data / restraints / parameters    2595 / 1 / 174  
Goodness-of-fit on F<sup>2</sup> 1.061  
Final R indices [I>2sigma(I)] R1 = 0.0285, wR2 = 0.0773  
R indices (all data)    R1 = 0.0289, wR2 = 0.0777  
Absolute structure parameter -0.12(13)  
Extinction coefficient 0.0134(16)  
Largest diff. peak and hole    0.189 and -0.144 e.Å<sup>-3</sup>

Table 2. Atomic coordinates ( x 10<sup>4</sup>) and equivalent isotropic displacement parameters (Å<sup>2</sup>x 10<sup>3</sup>) for Compound 9. U(eq) is defined as one third of the trace of the orthogonalized U<sub>ij</sub> tensor.

|       | x       | y | z       | U(eq)         |
|-------|---------|---|---------|---------------|
| C(1)  | 6466(2) |   | 3958(4) | 2951(1) 16(1) |
| C(2)  | 7645(2) |   | 5334(3) | 2776(1) 17(1) |
| C(3)  | 8123(2) |   | 4925(4) | 1990(1) 20(1) |
| C(4)  | 9233(2) |   | 6446(4) | 1996(1) 24(1) |
| C(5)  | 9862(2) |   | 8336(4) | 2782(1) 26(1) |
| C(6)  | 9407(2) |   | 8725(4) | 3586(1) 22(1) |
| C(7)  | 8306(2) |   | 7202(4) | 3581(1) 17(1) |
| C(8)  | 7688(2) |   | 6954(4) | 4349(1) 17(1) |
| C(9)  | 7746(2) |   | 7692(4) | 5315(1) 19(1) |
| C(10) | 6236(2) |   | 4447(4) | 4766(1) 18(1) |
| C(11) | 5099(2) |   | 4986(4) | 2199(1) 15(1) |
| C(12) | 3981(2) |   | 4199(3) | 2586(1) 16(1) |
| C(13) | 2617(2) |   | 4988(4) | 1819(1) 19(1) |
| C(14) | 2362(2) |   | 3777(4) | 748(1) 21(1)  |
| C(15) | 3465(2) |   | 4720(4) | 372(1) 20(1)  |
| C(16) | 4825(2) |   | 3804(4) | 1118(1) 18(1) |
| N(1)  | 6839(1) |   | 6092(3) | 5569(1) 20(1) |
| N(2)  | 6713(1) |   | 4925(3) | 4011(1) 16(1) |
| O(1)  | 4075(1) |   | 1245(3) | 2802(1) 19(1) |

Table 3. Bond lengths [Å] and angles [°] for Compound 9.

|                 |            |                   |            |
|-----------------|------------|-------------------|------------|
| C(1)-N(2)       | 1.4785(19) | C(10)-N(2)        | 1.348(2)   |
| C(1)-C(2)       | 1.525(2)   | C(10)-H(10)       | 0.9500     |
| C(1)-C(11)      | 1.551(2)   | C(11)-C(12)       | 1.534(2)   |
| C(1)-H(1)       | 1.0000     | C(11)-C(16)       | 1.535(2)   |
| C(2)-C(3)       | 1.384(2)   | C(11)-H(11)       | 1.0000     |
| C(2)-C(7)       | 1.407(2)   | C(12)-O(1)        | 1.426(2)   |
| C(3)-C(4)       | 1.395(2)   | C(12)-C(13)       | 1.524(2)   |
| C(3)-H(3)       | 0.9500     | C(12)-H(12)       | 1.0000     |
| C(4)-C(5)       | 1.389(3)   | C(13)-C(14)       | 1.530(2)   |
| C(4)-H(4)       | 0.9500     | C(13)-H(13A)      | 0.9900     |
| C(5)-C(6)       | 1.391(3)   | C(13)-H(13B)      | 0.9900     |
| C(5)-H(5)       | 0.9500     | C(14)-C(15)       | 1.530(2)   |
| C(6)-C(7)       | 1.388(3)   | C(14)-H(14A)      | 0.9900     |
| C(6)-H(6)       | 0.9500     | C(14)-H(14B)      | 0.9900     |
| C(7)-C(8)       | 1.456(2)   | C(15)-C(16)       | 1.528(2)   |
| C(8)-C(9)       | 1.372(2)   | C(15)-H(15A)      | 0.9900     |
| C(8)-N(2)       | 1.377(2)   | C(15)-H(15B)      | 0.9900     |
| C(9)-N(1)       | 1.381(2)   | C(16)-H(16A)      | 0.9900     |
| C(9)-H(9)       | 0.9500     | C(16)-H(16B)      | 0.9900     |
| C(10)-N(1)      | 1.328(2)   | O(1)-H(1A)        | 0.8400     |
|                 |            |                   |            |
| N(2)-C(1)-C(2)  | 99.61(12)  | C(2)-C(7)-C(8)    | 107.59(14) |
| N(2)-C(1)-C(11) | 111.45(13) | C(9)-C(8)-N(2)    | 105.92(14) |
| C(2)-C(1)-C(11) | 113.86(13) | C(9)-C(8)-C(7)    | 146.20(16) |
| N(2)-C(1)-H(1)  | 110.5      | N(2)-C(8)-C(7)    | 107.43(13) |
| C(2)-C(1)-H(1)  | 110.5      | C(8)-C(9)-N(1)    | 109.03(15) |
| C(11)-C(1)-H(1) | 110.5      | C(8)-C(9)-H(9)    | 125.5      |
| C(3)-C(2)-C(7)  | 119.67(15) | N(1)-C(9)-H(9)    | 125.5      |
| C(3)-C(2)-C(1)  | 129.59(15) | N(1)-C(10)-N(2)   | 110.67(14) |
| C(7)-C(2)-C(1)  | 110.71(14) | N(1)-C(10)-H(10)  | 124.7      |
| C(2)-C(3)-C(4)  | 119.14(16) | N(2)-C(10)-H(10)  | 124.7      |
| C(2)-C(3)-H(3)  | 120.4      | C(12)-C(11)-C(16) | 110.99(13) |
| C(4)-C(3)-H(3)  | 120.4      | C(12)-C(11)-C(1)  | 111.36(12) |
| C(5)-C(4)-C(3)  | 120.83(16) | C(16)-C(11)-C(1)  | 110.58(13) |
| C(5)-C(4)-H(4)  | 119.6      | C(12)-C(11)-H(11) | 107.9      |
| C(3)-C(4)-H(4)  | 119.6      | C(16)-C(11)-H(11) | 107.9      |
| C(4)-C(5)-C(6)  | 120.57(17) | C(1)-C(11)-H(11)  | 107.9      |
| C(4)-C(5)-H(5)  | 119.7      | O(1)-C(12)-C(13)  | 111.45(14) |
| C(6)-C(5)-H(5)  | 119.7      | O(1)-C(12)-C(11)  | 107.93(13) |
| C(7)-C(6)-C(5)  | 118.51(17) | C(13)-C(12)-C(11) | 112.22(13) |
| C(7)-C(6)-H(6)  | 120.7      | O(1)-C(12)-H(12)  | 108.4      |
| C(5)-C(6)-H(6)  | 120.7      | C(13)-C(12)-H(12) | 108.4      |
| C(6)-C(7)-C(2)  | 121.25(16) | C(11)-C(12)-H(12) | 108.4      |
| C(6)-C(7)-C(8)  | 130.97(16) | C(12)-C(13)-C(14) | 112.58(14) |

|                     |            |                     |            |
|---------------------|------------|---------------------|------------|
| C(12)-C(13)-H(13A)  | 109.1      | C(16)-C(15)-H(15B)  | 109.4      |
| C(14)-C(13)-H(13A)  | 109.1      | C(14)-C(15)-H(15B)  | 109.4      |
| C(12)-C(13)-H(13B)  | 109.1      | H(15A)-C(15)-H(15B) | 108.0      |
| C(14)-C(13)-H(13B)  | 109.1      | C(15)-C(16)-C(11)   | 111.48(13) |
| H(13A)-C(13)-H(13B) | 107.8      | C(15)-C(16)-H(16A)  | 109.3      |
| C(15)-C(14)-C(13)   | 109.67(14) | C(11)-C(16)-H(16A)  | 109.3      |
| C(15)-C(14)-H(14A)  | 109.7      | C(15)-C(16)-H(16B)  | 109.3      |
| C(13)-C(14)-H(14A)  | 109.7      | C(11)-C(16)-H(16B)  | 109.3      |
| C(15)-C(14)-H(14B)  | 109.7      | H(16A)-C(16)-H(16B) | 108.0      |
| C(13)-C(14)-H(14B)  | 109.7      | C(10)-N(1)-C(9)     | 106.41(13) |
| H(14A)-C(14)-H(14B) | 108.2      | C(10)-N(2)-C(8)     | 107.94(13) |
| C(16)-C(15)-C(14)   | 111.04(13) | C(10)-N(2)-C(1)     | 138.46(14) |
| C(16)-C(15)-H(15A)  | 109.4      | C(8)-N(2)-C(1)      | 113.58(13) |
| C(14)-C(15)-H(15A)  | 109.4      | C(12)-O(1)-H(1A)    | 109.5      |

---

Symmetry transformations used to generate equivalent atoms:

Table 4. Anisotropic displacement parameters ( $\text{\AA}^2 \times 10^3$ ) for Compound 9. The anisotropic displacement factor exponent takes the form:  $-2[h^2 a^2 U_{11} + \dots + 2 h k a^* b^* U_{12}]$

|       | U11   | U22   | U33   | U23   | U13   | U12   |
|-------|-------|-------|-------|-------|-------|-------|
| C(1)  | 18(1) | 15(1) | 13(1) | -2(1) | 6(1)  | 0(1)  |
| C(2)  | 15(1) | 17(1) | 18(1) | 4(1)  | 4(1)  | 3(1)  |
| C(3)  | 17(1) | 24(1) | 18(1) | 2(1)  | 5(1)  | 4(1)  |
| C(4)  | 18(1) | 35(1) | 20(1) | 7(1)  | 8(1)  | 7(1)  |
| C(5)  | 16(1) | 32(1) | 29(1) | 7(1)  | 8(1)  | 0(1)  |
| C(6)  | 17(1) | 23(1) | 24(1) | 0(1)  | 4(1)  | -1(1) |
| C(7)  | 14(1) | 18(1) | 18(1) | 2(1)  | 4(1)  | 4(1)  |
| C(8)  | 14(1) | 16(1) | 18(1) | 0(1)  | 3(1)  | 2(1)  |
| C(9)  | 17(1) | 20(1) | 18(1) | -4(1) | 3(1)  | 1(1)  |
| C(10) | 18(1) | 21(1) | 17(1) | 2(1)  | 6(1)  | 3(1)  |
| C(11) | 16(1) | 14(1) | 15(1) | 0(1)  | 6(1)  | 1(1)  |
| C(12) | 19(1) | 14(1) | 15(1) | -1(1) | 7(1)  | 0(1)  |
| C(13) | 17(1) | 20(1) | 21(1) | 0(1)  | 7(1)  | 1(1)  |
| C(14) | 18(1) | 24(1) | 18(1) | 0(1)  | 2(1)  | -2(1) |
| C(15) | 22(1) | 23(1) | 15(1) | 0(1)  | 5(1)  | -1(1) |
| C(16) | 19(1) | 20(1) | 15(1) | -1(1) | 7(1)  | 0(1)  |
| N(1)  | 18(1) | 24(1) | 17(1) | -2(1) | 6(1)  | 3(1)  |
| N(2)  | 17(1) | 16(1) | 14(1) | -1(1) | 5(1)  | 1(1)  |
| O(1)  | 24(1) | 15(1) | 19(1) | 2(1)  | 10(1) | -2(1) |

Table 5. Hydrogen coordinates (  $\times 10^4$ ) and isotropic displacement parameters ( $\text{\AA}^2 \times 10^3$ ) for Compound 9.

|        | x     | y     | z    | U(eq) |    |
|--------|-------|-------|------|-------|----|
| H(1)   | 6529  | 1853  | 2928 | 19    |    |
| H(3)   | 7701  | 3627  | 1452 | 24    |    |
| H(4)   | 9563  | 6186  | 1456 | 29    |    |
| H(5)   | 10610 | 9372  | 2769 | 31    |    |
| H(6)   | 9839  | 10005 | 4128 | 26    |    |
| H(9)   | 8318  | 9080  | 5741 | 23    |    |
| H(10)  | 5562  | 3117  | 4729 | 22    |    |
| H(11)  | 5130  | 7094  | 2160 | 18    |    |
| H(12)  | 4126  | 5245  | 3240 | 19    |    |
| H(13A) |       | 2541  | 7072 | 1772  | 23 |
| H(13B) |       | 1928  | 4278 | 2072  | 23 |
| H(14A) |       | 2337  | 1688 | 773   | 25 |
| H(14B) |       | 1493  | 4448 | 267   | 25 |
| H(15A) |       | 3310  | 3887 | -312  | 24 |
| H(15B) |       | 3444  | 6803 | 300   | 24 |
| H(16A) |       | 5520  | 4476 | 864   | 21 |
| H(16B) |       | 4867  | 1714 | 1150  | 21 |
| H(1A)  | 3749  | 899   | 3253 | 28    |    |

### **Experimental data for SC-XRD on Compound ent-12**

X-ray quality crystals were grown from a saturated 1,2-dichloroethane/ethanol/methanol solution followed by the slow vapor diffusion of diisopropyl ether to deposit the crystal diffracted. A colorless prism 0.070 x 0.060 x 0.050 mm in size was mounted on a Cryoloop with Paratone oil. Data were collected in a nitrogen gas stream at 100(2) K using and scans. Crystal-to-detector distance was 60 mm and exposure time was 1 seconds per frame using a scan width of 2.0°. Data collection was 99.4% complete to 67.000° in theta. A total of 10940 reflections were collected covering the indices,  $-6 \leq h \leq 6$ ,  $-7 \leq k \leq 8$ ,  $-35 \leq l \leq 35$ . 2032 reflections were found to be symmetry independent, with an  $R_{\text{int}}$  of 0.0552. Indexing and unit cell refinement indicated a primitive, orthorhombic lattice. The space group was found to be P 21 21 21 (No. 19). The data were integrated using the Bruker SAINT software program and scaled using the SADABS software program. Solution by iterative methods (SHELXT-2014) produced a complete heavy-atom phasing model consistent with the proposed structure. All non-hydrogen atoms were refined anisotropically by full-matrix least-squares (SHELXL-2014). All hydrogen atoms were placed using a riding model. Their positions were constrained relative to their parent atom using the appropriate HFIX command in SHELXL-2014. Absolute stereochemistry was unambiguously determined to be *R* at C1 and C11, and *S* at C12, respectively.

Table 1. Crystal data and structure refinement for Compound ent-12.

X-ray ID      Compound ent-12  
 Sample/notebook ID    Compound ent-12  
 Empirical formula    C<sub>14</sub>H<sub>14</sub>N<sub>2</sub>O  
 Formula weight      226.27  
 Temperature    100(2) K  
 Wavelength    1.54178 Å  
 Crystal system      Orthorhombic  
 Space group    P 21 21 21  
 Unit cell dimensions    a = 5.7576(3) Å      alpha = 90°.  
                               b = 6.6825(4) Å      beta = 90°.  
                               c = 29.3671(16) Å    gamma = 90°.  
 Volume          1129.90(11) Å<sup>3</sup>  
 Z                4  
 Density (calculated) 1.330 Mg/m<sup>3</sup>  
 Absorption coefficient    0.679 mm<sup>-1</sup>  
 F(000) 480  
 Crystal size    0.070 x 0.060 x 0.050 mm<sup>3</sup>  
 Theta range for data collection    3.009 to 68.154°.  
 Index ranges    -6<=h<=6, -7<=k<=8, -35<=l<=35  
 Reflections collected 10940  
 Independent reflections    2032 [R(int) = 0.0552]  
 Completeness to theta = 67.000°    99.4 %  
 Absorption correction Semi-empirical from equivalents  
 Max. and min. transmission    0.929 and 0.825  
 Refinement method    Full-matrix least-squares on F<sup>2</sup>  
 Data / restraints / parameters 2032 / 0 / 155  
 Goodness-of-fit on F<sup>2</sup> 1.050  
 Final R indices [I>2sigma(I)] R1 = 0.0331, wR2 = 0.0821  
 R indices (all data)    R1 = 0.0339, wR2 = 0.0825  
 Absolute structure parameter 0.01(14)  
 Extinction coefficient n/a  
 Largest diff. peak and hole    0.180 and -0.191 e.Å<sup>-3</sup>



Table 2. Atomic coordinates ( x 104) and equivalent isotropic displacement parameters ( $\text{\AA}^2 \times 10^3$ ) for Compound ent-12. U(eq) is defined as one third of the trace of the orthogonalized  $U_{ij}$  tensor.

|       | x        | y       | z       | U(eq)         |
|-------|----------|---------|---------|---------------|
| C(1)  | 2015(4)  |         | 6641(3) | 3695(1) 18(1) |
| C(2)  | 3751(3)  |         | 6491(3) | 4085(1) 19(1) |
| C(3)  | 5351(4)  |         | 7902(3) | 4229(1) 21(1) |
| C(4)  | 6920(4)  |         | 7381(3) | 4571(1) 23(1) |
| C(5)  | 6887(4)  |         | 5463(3) | 4760(1) 24(1) |
| C(6)  | 5269(4)  |         | 4052(3) | 4622(1) 23(1) |
| C(7)  | 3680(4)  |         | 4579(3) | 4286(1) 19(1) |
| C(8)  | 1795(3)  |         | 3469(3) | 4070(1) 19(1) |
| C(9)  | 533(4)   | 1739(3) |         | 4055(1) 23(1) |
| C(10) | -890(3)  | 3678(3) |         | 3538(1) 23(1) |
| C(11) | 3212(3)  |         | 6863(3) | 3234(1) 19(1) |
| C(12) | 4403(3)  |         | 8876(3) | 3123(1) 21(1) |
| C(13) | 3512(4)  |         | 8680(3) | 2629(1) 22(1) |
| C(14) | 1732(4)  |         | 7109(3) | 2796(1) 22(1) |
| N(1)  | -1146(3) |         | 1876(3) | 3721(1) 25(1) |
| N(2)  | 856(3)   | 4687(2) |         | 3739(1) 19(1) |
| O(1)  | 6829(2)  |         | 8937(2) | 3176(1) 26(1) |

Table 3. Bond lengths [ $\text{\AA}$ ] and angles [ $^\circ$ ] for Compound ent-12.

|                 |            |                     |            |
|-----------------|------------|---------------------|------------|
| C(1)-N(2)       | 1.472(2)   | C(9)-N(1)           | 1.381(3)   |
| C(1)-C(2)       | 1.523(3)   | C(9)-H(9)           | 0.9500     |
| C(1)-C(11)      | 1.528(2)   | C(10)-N(1)          | 1.327(3)   |
| C(1)-H(1)       | 1.0000     | C(10)-N(2)          | 1.347(2)   |
| C(2)-C(3)       | 1.385(3)   | C(10)-H(10)         | 0.9500     |
| C(2)-C(7)       | 1.408(3)   | C(11)-C(12)         | 1.545(3)   |
| C(3)-C(4)       | 1.394(3)   | C(11)-C(14)         | 1.551(2)   |
| C(3)-H(3)       | 0.9500     | C(11)-H(11)         | 1.0000     |
| C(4)-C(5)       | 1.398(3)   | C(12)-O(1)          | 1.406(2)   |
| C(4)-H(4)       | 0.9500     | C(12)-C(13)         | 1.545(2)   |
| C(5)-C(6)       | 1.387(3)   | C(12)-H(12)         | 1.0000     |
| C(5)-H(5)       | 0.9500     | C(13)-C(14)         | 1.547(3)   |
| C(6)-C(7)       | 1.390(3)   | C(13)-H(13A)        | 0.9900     |
| C(6)-H(6)       | 0.9500     | C(13)-H(13B)        | 0.9900     |
| C(7)-C(8)       | 1.460(3)   | C(14)-H(14A)        | 0.9900     |
| C(8)-C(9)       | 1.366(3)   | C(14)-H(14B)        | 0.9900     |
| C(8)-N(2)       | 1.377(2)   | O(1)-H(1A)          | 0.8400     |
|                 |            |                     |            |
| N(2)-C(1)-C(2)  | 99.96(14)  | N(2)-C(8)-C(7)      | 107.37(16) |
| N(2)-C(1)-C(11) | 111.59(15) | C(8)-C(9)-N(1)      | 109.78(17) |
| C(2)-C(1)-C(11) | 112.15(16) | C(8)-C(9)-H(9)      | 125.1      |
| N(2)-C(1)-H(1)  | 110.9      | N(1)-C(9)-H(9)      | 125.1      |
| C(2)-C(1)-H(1)  | 110.9      | N(1)-C(10)-N(2)     | 111.05(17) |
| C(11)-C(1)-H(1) | 110.9      | N(1)-C(10)-H(10)    | 124.5      |
| C(3)-C(2)-C(7)  | 120.57(18) | N(2)-C(10)-H(10)    | 124.5      |
| C(3)-C(2)-C(1)  | 128.43(17) | C(1)-C(11)-C(12)    | 118.06(15) |
| C(7)-C(2)-C(1)  | 110.89(16) | C(1)-C(11)-C(14)    | 119.87(16) |
| C(2)-C(3)-C(4)  | 118.77(18) | C(12)-C(11)-C(14)   | 88.73(14)  |
| C(2)-C(3)-H(3)  | 120.6      | C(1)-C(11)-H(11)    | 109.5      |
| C(4)-C(3)-H(3)  | 120.6      | C(12)-C(11)-H(11)   | 109.5      |
| C(3)-C(4)-C(5)  | 120.45(19) | C(14)-C(11)-H(11)   | 109.5      |
| C(3)-C(4)-H(4)  | 119.8      | O(1)-C(12)-C(11)    | 116.32(18) |
| C(5)-C(4)-H(4)  | 119.8      | O(1)-C(12)-C(13)    | 115.81(16) |
| C(6)-C(5)-C(4)  | 121.08(19) | C(11)-C(12)-C(13)   | 88.59(15)  |
| C(6)-C(5)-H(5)  | 119.5      | O(1)-C(12)-H(12)    | 111.4      |
| C(4)-C(5)-H(5)  | 119.5      | C(11)-C(12)-H(12)   | 111.4      |
| C(5)-C(6)-C(7)  | 118.53(19) | C(13)-C(12)-H(12)   | 111.4      |
| C(5)-C(6)-H(6)  | 120.7      | C(12)-C(13)-C(14)   | 88.88(14)  |
| C(7)-C(6)-H(6)  | 120.7      | C(12)-C(13)-H(13A)  | 113.8      |
| C(6)-C(7)-C(2)  | 120.57(18) | C(14)-C(13)-H(13A)  | 113.8      |
| C(6)-C(7)-C(8)  | 131.98(18) | C(12)-C(13)-H(13B)  | 113.8      |
| C(2)-C(7)-C(8)  | 107.43(17) | C(14)-C(13)-H(13B)  | 113.8      |
| C(9)-C(8)-N(2)  | 105.61(17) | H(13A)-C(13)-H(13B) | 111.1      |
| C(9)-C(8)-C(7)  | 147.02(19) | C(13)-C(14)-C(11)   | 88.30(14)  |

|                     |       |                  |            |
|---------------------|-------|------------------|------------|
| C(13)-C(14)-H(14A)  | 113.9 | C(10)-N(1)-C(9)  | 105.70(17) |
| C(11)-C(14)-H(14A)  | 113.9 | C(10)-N(2)-C(8)  | 107.85(16) |
| C(13)-C(14)-H(14B)  | 113.9 | C(10)-N(2)-C(1)  | 138.07(17) |
| C(11)-C(14)-H(14B)  | 113.9 | C(8)-N(2)-C(1)   | 114.07(15) |
| H(14A)-C(14)-H(14B) | 111.1 | C(12)-O(1)-H(1A) | 109.5      |

---

Symmetry transformations used to generate equivalent atoms:

Table 4. Anisotropic displacement parameters ( $\text{\AA}^2 \times 10^3$ ) for Compound ent-12. The anisotropic displacement factor exponent takes the form:  $-2[h^2 a^2 U_{11} + \dots + 2 h k a^* b^* U_{12}]$

|       | U11   | U22   | U33   | U23   | U13   | U12   |
|-------|-------|-------|-------|-------|-------|-------|
| C(1)  | 19(1) | 17(1) | 20(1) | -2(1) | 1(1)  | -2(1) |
| C(2)  | 19(1) | 21(1) | 16(1) | -2(1) | 3(1)  | 0(1)  |
| C(3)  | 23(1) | 21(1) | 17(1) | -3(1) | 3(1)  | -4(1) |
| C(4)  | 21(1) | 30(1) | 18(1) | -5(1) | 1(1)  | -5(1) |
| C(5)  | 23(1) | 32(1) | 16(1) | -2(1) | -2(1) | 1(1)  |
| C(6)  | 26(1) | 24(1) | 18(1) | 1(1)  | 0(1)  | 2(1)  |
| C(7)  | 22(1) | 21(1) | 16(1) | -4(1) | 2(1)  | 0(1)  |
| C(8)  | 21(1) | 21(1) | 16(1) | -2(1) | 1(1)  | 1(1)  |
| C(9)  | 25(1) | 23(1) | 20(1) | 0(1)  | 2(1)  | -2(1) |
| C(10) | 20(1) | 28(1) | 20(1) | -1(1) | -2(1) | -3(1) |
| C(11) | 18(1) | 21(1) | 17(1) | -2(1) | -1(1) | 1(1)  |
| C(12) | 18(1) | 23(1) | 20(1) | -2(1) | 0(1)  | -1(1) |
| C(13) | 23(1) | 24(1) | 19(1) | 2(1)  | -1(1) | 0(1)  |
| C(14) | 20(1) | 29(1) | 17(1) | -1(1) | -2(1) | -1(1) |
| N(1)  | 24(1) | 27(1) | 23(1) | -3(1) | 0(1)  | -6(1) |
| N(2)  | 19(1) | 21(1) | 17(1) | -1(1) | 0(1)  | -1(1) |
| O(1)  | 20(1) | 34(1) | 26(1) | -7(1) | 1(1)  | -6(1) |

Table 5. Hydrogen coordinates (  $\times 10^4$ ) and isotropic displacement parameters ( $\text{\AA}^2 \times 10^3$ ) for Compound ent-12.

---

|        | x     | y     | z    | U(eq) |    |
|--------|-------|-------|------|-------|----|
| H(1)   | 893   | 7760  | 3748 | 22    |    |
| H(3)   | 5379  | 9201  | 4098 | 25    |    |
| H(4)   | 8018  | 8337  | 4676 | 28    |    |
| H(5)   | 7992  | 5120  | 4988 | 28    |    |
| H(6)   | 5246  | 2753  | 4753 | 27    |    |
| H(9)   | 775   | 611   | 4246 | 27    |    |
| H(10)  | -1815 | 4188  | 3296 | 27    |    |
| H(11)  | 4347  | 5745  | 3191 | 23    |    |
| H(12)  | 3635  | 10013 | 3286 | 25    |    |
| H(13A) |       | 4679  | 8141 | 2414  | 27 |
| H(13B) |       | 2794  | 9918 | 2509  | 27 |
| H(14A) |       | 1663  | 5890 | 2604  | 26 |
| H(14B) |       | 160   | 7658 | 2851  | 26 |
| H(1A)  | 7183  | 9839  | 3363 | 40    |    |

---

### **Experimental data for SC-XRD on Compound ent-13**

X-ray quality crystals were grown from a saturated 1,2-dichloroethane/ethanol/methanol solution followed by the slow vapor diffusion of heptane to deposit the crystal diffracted. A colorless prism 0.120 x 0.100 x 0.100 mm in size was mounted on a Cryoloop with Paratone oil. Data were collected in a nitrogen gas stream at 100(2) K using  $\omega$  scans. Crystal-to-detector distance was 60 mm and exposure time was 1 seconds per frame using a scan width of 2.0°. Data collection was 99.4% complete to 67.000° in theta. A total of 13431 reflections were collected covering the indices,  $-6 \leq h \leq 6$ ,  $-11 \leq k \leq 11$ ,  $-28 \leq l \leq 25$ . 2340 reflections were found to be symmetry independent, with an  $R_{\text{int}}$  of 0.0385. Indexing and unit cell refinement indicated a primitive, orthorhombic lattice. The space group was found to be P 21 21 21 (No. 19). The data were integrated using the Bruker SAINT software program and scaled using the SADABS software program. Solution by iterative methods (SHELXT-2014) produced a complete heavy-atom phasing model consistent with the proposed structure. All non-hydrogen atoms were refined anisotropically by full-matrix least-squares (SHELXL-2014). All hydrogen atoms were placed using a riding model. Their positions were constrained relative to their parent atom using the appropriate HFIX command in SHELXL-2014. Absolute stereochemistry was unambiguously determined to be *R* at C1, C11, and C12, respectively.

Table 1. Crystal data and structure refinement for Compound ent-13.

X-ray ID      Compound ent-13  
 Sample/notebook ID    Compound ent-13  
 Empirical formula    C<sub>15</sub> H<sub>16</sub> N<sub>2</sub> O<sub>2</sub>  
 Formula weight      256.30  
 Temperature    100(2) K  
 Wavelength    1.54178 Å  
 Crystal system      Orthorhombic  
 Space group    P 21 21 21  
 Unit cell dimensions    a = 5.7224(3) Å      alpha = 90°.  
                               b = 9.4414(5) Å      beta = 90°.  
                               c = 23.8273(12) Å    gamma = 90°.  
 Volume          1287.33(12) Å<sup>3</sup>  
 Z                4  
 Density (calculated) 1.322 Mg/m<sup>3</sup>  
 Absorption coefficient    0.719 mm<sup>-1</sup>  
 F(000) 544  
 Crystal size    0.120 x 0.100 x 0.100 mm<sup>3</sup>  
 Theta range for data collection    5.039 to 68.456°.  
 Index ranges    -6<=h<=6, -11<=k<=11, -28<=l<=25  
 Reflections collected 13431  
 Independent reflections    2340 [R(int) = 0.0385]  
 Completeness to theta = 67.000°    99.4 %  
 Absorption correction Semi-empirical from equivalents  
 Max. and min. transmission 0.929 and 0.802  
 Refinement method    Full-matrix least-squares on F<sup>2</sup>  
 Data / restraints / parameters 2340 / 0 / 173  
 Goodness-of-fit on F<sup>2</sup> 1.086  
 Final R indices [I>2sigma(I)] R1 = 0.0304, wR2 = 0.0778  
 R indices (all data)    R1 = 0.0306, wR2 = 0.0780  
 Absolute structure parameter 0.05(7)  
 Extinction coefficient n/a  
 Largest diff. peak and hole    0.183 and -0.198 e.Å<sup>-3</sup>

Table 2. Atomic coordinates ( x 10<sup>4</sup>) and equivalent isotropic displacement parameters (Å<sup>2</sup>x 10<sup>3</sup>) for Compound ent-13. U(eq) is defined as one third of the trace of the orthogonalized U<sub>ij</sub> tensor.

|       | x       | y       | z       | U(eq)         |
|-------|---------|---------|---------|---------------|
| C(1)  | 4134(3) |         | 4455(2) | 4020(1) 16(1) |
| C(2)  | 2873(3) |         | 3063(2) | 3921(1) 16(1) |
| C(3)  | 3435(3) |         | 2008(2) | 3543(1) 18(1) |
| C(4)  | 1978(4) |         | 822(2)  | 3503(1) 21(1) |
| C(5)  | -11(4)  | 718(2)  | 3836(1) | 21(1)         |
| C(6)  | -590(3) | 1784(2) |         | 4217(1) 19(1) |
| C(7)  | 864(3)  | 2953(2) |         | 4258(1) 16(1) |
| C(8)  | 794(3)  | 4207(2) |         | 4619(1) 15(1) |
| C(9)  | -214(3) | 4848(2) |         | 5073(1) 18(1) |
| C(10) | 2805(4) |         | 6107(2) | 4849(1) 19(1) |
| C(11) | 4231(3) |         | 5402(2) | 3494(1) 16(1) |
| C(12) | 5024(3) |         | 6915(2) | 3619(1) 17(1) |
| C(13) | 5354(4) |         | 7695(2) | 3064(1) 21(1) |
| C(14) | 2298(4) |         | 6397(2) | 2642(1) 23(1) |
| C(15) | 1922(3) |         | 5517(2) | 3168(1) 19(1) |
| N(1)  | 1073(3) |         | 6038(2) | 5215(1) 19(1) |
| N(2)  | 2696(3) |         | 5031(2) | 4480(1) 16(1) |
| O(1)  | 3222(3) |         | 7777(1) | 2757(1) 23(1) |
| O(2)  | 7136(2) |         | 6934(1) | 3930(1) 21(1) |



Table 3. Bond lengths [Å] and angles [°] for Compound ent-13.

|                 |            |                    |            |
|-----------------|------------|--------------------|------------|
| C(1)-N(2)       | 1.474(2)   | C(10)-N(1)         | 1.322(2)   |
| C(1)-C(2)       | 1.518(2)   | C(10)-N(2)         | 1.346(2)   |
| C(1)-C(11)      | 1.540(2)   | C(10)-H(10)        | 0.9500     |
| C(1)-H(1)       | 1.0000     | C(11)-C(12)        | 1.529(2)   |
| C(2)-C(3)       | 1.381(3)   | C(11)-C(15)        | 1.537(2)   |
| C(2)-C(7)       | 1.406(2)   | C(11)-H(11)        | 1.0000     |
| C(3)-C(4)       | 1.399(3)   | C(12)-O(2)         | 1.418(2)   |
| C(3)-H(3)       | 0.9500     | C(12)-C(13)        | 1.526(3)   |
| C(4)-C(5)       | 1.391(3)   | C(12)-H(12)        | 1.0000     |
| C(4)-H(4)       | 0.9500     | C(13)-O(1)         | 1.424(2)   |
| C(5)-C(6)       | 1.395(3)   | C(13)-H(13A)       | 0.9900     |
| C(5)-H(5)       | 0.9500     | C(13)-H(13B)       | 0.9900     |
| C(6)-C(7)       | 1.386(3)   | C(14)-O(1)         | 1.432(2)   |
| C(6)-H(6)       | 0.9500     | C(14)-C(15)        | 1.520(3)   |
| C(7)-C(8)       | 1.464(3)   | C(14)-H(14A)       | 0.9900     |
| C(8)-C(9)       | 1.368(3)   | C(14)-H(14B)       | 0.9900     |
| C(8)-N(2)       | 1.378(2)   | C(15)-H(15A)       | 0.9900     |
| C(9)-N(1)       | 1.385(3)   | C(15)-H(15B)       | 0.9900     |
| C(9)-H(9)       | 0.9500     | O(2)-H(2)          | 0.8400     |
|                 |            |                    |            |
| N(2)-C(1)-C(2)  | 99.79(14)  | C(9)-C(8)-N(2)     | 105.87(16) |
| N(2)-C(1)-C(11) | 114.26(14) | C(9)-C(8)-C(7)     | 146.53(18) |
| C(2)-C(1)-C(11) | 113.09(14) | N(2)-C(8)-C(7)     | 107.10(15) |
| N(2)-C(1)-H(1)  | 109.8      | C(8)-C(9)-N(1)     | 109.15(16) |
| C(2)-C(1)-H(1)  | 109.8      | C(8)-C(9)-H(9)     | 125.4      |
| C(11)-C(1)-H(1) | 109.8      | N(1)-C(9)-H(9)     | 125.4      |
| C(3)-C(2)-C(7)  | 120.64(17) | N(1)-C(10)-N(2)    | 111.05(17) |
| C(3)-C(2)-C(1)  | 128.02(16) | N(1)-C(10)-H(10)   | 124.5      |
| C(7)-C(2)-C(1)  | 111.29(15) | N(2)-C(10)-H(10)   | 124.5      |
| C(2)-C(3)-C(4)  | 118.88(17) | C(12)-C(11)-C(15)  | 106.69(14) |
| C(2)-C(3)-H(3)  | 120.6      | C(12)-C(11)-C(1)   | 113.28(14) |
| C(4)-C(3)-H(3)  | 120.6      | C(15)-C(11)-C(1)   | 114.95(14) |
| C(5)-C(4)-C(3)  | 120.34(17) | C(12)-C(11)-H(11)  | 107.2      |
| C(5)-C(4)-H(4)  | 119.8      | C(15)-C(11)-H(11)  | 107.2      |
| C(3)-C(4)-H(4)  | 119.8      | C(1)-C(11)-H(11)   | 107.2      |
| C(4)-C(5)-C(6)  | 120.97(17) | O(2)-C(12)-C(13)   | 109.98(15) |
| C(4)-C(5)-H(5)  | 119.5      | O(2)-C(12)-C(11)   | 111.47(15) |
| C(6)-C(5)-H(5)  | 119.5      | C(13)-C(12)-C(11)  | 108.65(15) |
| C(7)-C(6)-C(5)  | 118.55(18) | O(2)-C(12)-H(12)   | 108.9      |
| C(7)-C(6)-H(6)  | 120.7      | C(13)-C(12)-H(12)  | 108.9      |
| C(5)-C(6)-H(6)  | 120.7      | C(11)-C(12)-H(12)  | 108.9      |
| C(6)-C(7)-C(2)  | 120.61(17) | O(1)-C(13)-C(12)   | 111.39(15) |
| C(6)-C(7)-C(8)  | 132.02(17) | O(1)-C(13)-H(13A)  | 109.3      |
| C(2)-C(7)-C(8)  | 107.34(16) | C(12)-C(13)-H(13A) | 109.3      |

|                     |            |                     |            |
|---------------------|------------|---------------------|------------|
| O(1)-C(13)-H(13B)   | 109.3      | C(11)-C(15)-H(15A)  | 109.8      |
| C(12)-C(13)-H(13B)  | 109.3      | C(14)-C(15)-H(15B)  | 109.8      |
| H(13A)-C(13)-H(13B) | 108.0      | C(11)-C(15)-H(15B)  | 109.8      |
| O(1)-C(14)-C(15)    | 113.06(15) | H(15A)-C(15)-H(15B) | 108.2      |
| O(1)-C(14)-H(14A)   | 109.0      | C(10)-N(1)-C(9)     | 106.10(15) |
| C(15)-C(14)-H(14A)  | 109.0      | C(10)-N(2)-C(8)     | 107.82(15) |
| O(1)-C(14)-H(14B)   | 109.0      | C(10)-N(2)-C(1)     | 137.60(16) |
| C(15)-C(14)-H(14B)  | 109.0      | C(8)-N(2)-C(1)      | 114.28(15) |
| H(14A)-C(14)-H(14B) | 107.8      | C(13)-O(1)-C(14)    | 111.43(14) |
| C(14)-C(15)-C(11)   | 109.55(15) | C(12)-O(2)-H(2)     | 109.5      |
| C(14)-C(15)-H(15A)  | 109.8      |                     |            |

---

Symmetry transformations used to generate equivalent atoms:

Table 4. Anisotropic displacement parameters ( $\text{\AA}^2 \times 10^3$ ) for Compound ent-13. The anisotropic displacement factor exponent takes the form:  $-2 \sum [h^2 a^2 U_{11} + \dots + 2 h k a^* b^* U_{12}]$

|       | U11   | U22   | U33   | U23   | U13   | U12   |
|-------|-------|-------|-------|-------|-------|-------|
| C(1)  | 15(1) | 17(1) | 15(1) | -3(1) | 2(1)  | 0(1)  |
| C(2)  | 17(1) | 16(1) | 15(1) | 1(1)  | -1(1) | 1(1)  |
| C(3)  | 18(1) | 19(1) | 18(1) | -1(1) | 0(1)  | 2(1)  |
| C(4)  | 28(1) | 17(1) | 19(1) | -2(1) | -5(1) | 3(1)  |
| C(5)  | 25(1) | 18(1) | 20(1) | 2(1)  | -7(1) | -4(1) |
| C(6)  | 18(1) | 21(1) | 19(1) | 4(1)  | -3(1) | -2(1) |
| C(7)  | 16(1) | 16(1) | 15(1) | 2(1)  | -2(1) | 3(1)  |
| C(8)  | 15(1) | 17(1) | 14(1) | 3(1)  | -1(1) | 0(1)  |
| C(9)  | 17(1) | 19(1) | 17(1) | 3(1)  | 3(1)  | 2(1)  |
| C(10) | 23(1) | 17(1) | 17(1) | -1(1) | 1(1)  | -1(1) |
| C(11) | 16(1) | 17(1) | 14(1) | -2(1) | 3(1)  | -1(1) |
| C(12) | 17(1) | 18(1) | 16(1) | -2(1) | 1(1)  | -1(1) |
| C(13) | 24(1) | 19(1) | 22(1) | 0(1)  | 0(1)  | -3(1) |
| C(14) | 28(1) | 23(1) | 18(1) | 0(1)  | -2(1) | -4(1) |
| C(15) | 19(1) | 22(1) | 17(1) | -1(1) | -1(1) | -4(1) |
| N(1)  | 24(1) | 17(1) | 16(1) | 0(1)  | 3(1)  | 3(1)  |
| N(2)  | 17(1) | 16(1) | 14(1) | -1(1) | 2(1)  | -1(1) |
| O(1)  | 29(1) | 19(1) | 21(1) | 1(1)  | -4(1) | 0(1)  |
| O(2)  | 20(1) | 22(1) | 21(1) | -4(1) | -3(1) | -4(1) |

Table 5. Hydrogen coordinates ( x 104) and isotropic displacement parameters ( $\text{\AA}^2 \times 103$ ) for Compound ent-13.

---

|        | x     | y    | z    | U(eq) |    |
|--------|-------|------|------|-------|----|
| H(1)   | 5754  | 4267 | 4159 | 19    |    |
| H(3)   | 4789  | 2085 | 3314 | 22    |    |
| H(4)   | 2348  | 85   | 3246 | 25    |    |
| H(5)   | -988  | -92  | 3804 | 25    |    |
| H(6)   | -1952 | 1710 | 4443 | 23    |    |
| H(9)   | -1580 | 4528 | 5261 | 21    |    |
| H(10)  | 3973  | 6822 | 4847 | 23    |    |
| H(11)  | 5410  | 4976 | 3234 | 19    |    |
| H(12)  | 3781  | 7405 | 3841 | 20    |    |
| H(13A) |       | 5937 | 8664 | 3139  | 26 |
| H(13B) |       | 6541 | 7195 | 2835  | 26 |
| H(14A) |       | 3386 | 5889 | 2389  | 27 |
| H(14B) |       | 789  | 6500 | 2443  | 27 |
| H(15A) |       | 1367 | 4559 | 3064  | 23 |
| H(15B) |       | 717  | 5967 | 3407  | 23 |
| H(2)   | 7047  | 7548 | 4184 | 31    |    |

---

### **Experimental data for SC-XRD on Compound ent-14**

X-ray quality crystals were grown from a saturated 1,2-dichloroethane/ethanol/methanol solution followed by the slow vapor diffusion of heptane to deposit the crystal diffracted. A colorless plate 0.080 x 0.050 x 0.020 mm in size was mounted on a Cryoloop with Paratone oil. Data were collected in a nitrogen gas stream at 100(2) K using  $\omega$  scans. Crystal-to-detector distance was 60 mm and exposure time was 4 seconds per frame using a scan width of 2.0°. Data collection was 98.3% complete to 67.000° in theta. A total of 7624 reflections were collected covering the indices,  $-12 \leq h \leq 11$ ,  $-5 \leq k \leq 6$ ,  $-15 \leq l \leq 15$ . 2136 reflections were found to be symmetry independent, with an  $R_{\text{int}}$  of 0.0768. Indexing and unit cell refinement indicated a primitive, monoclinic lattice. The space group was found to be P 21 (No. 4). The data were integrated using the Bruker SAINT software program and scaled using the SADABS software program. Solution by iterative methods (SHELXT-2014) produced a complete heavy-atom phasing model consistent with the proposed structure. All non-hydrogen atoms were refined anisotropically by full-matrix least-squares (SHELXL-2014). All hydrogen atoms were placed using a riding model. Their positions were constrained relative to their parent atom using the appropriate HFIX command in SHELXL-2014. Absolute stereochemistry was unambiguously determined to be *R* at C1 and *S* at C11, and C12, respectively.

Table 1. Crystal data and structure refinement for Compound ent-14.

X-ray ID      Compound ent-14  
 Sample/notebook ID    Compound ent-14  
 Empirical formula    C<sub>15</sub> H<sub>16</sub> N<sub>2</sub> O<sub>2</sub>  
 Formula weight      256.30  
 Temperature    100(2) K  
 Wavelength    1.54178 Å  
 Crystal system      Monoclinic  
 Space group    P 21  
 Unit cell dimensions    a = 9.9840(9) Å      alpha = 90°.  
                               b = 5.4028(3) Å      beta = 111.475(6)°.  
                               c = 12.6101(10) Å    gamma = 90°.  
 Volume          632.99(9) Å<sup>3</sup>  
 Z                2  
 Density (calculated) 1.345 Mg/m<sup>3</sup>  
 Absorption coefficient    0.731 mm<sup>-1</sup>  
 F(000) 272  
 Crystal size    0.080 x 0.050 x 0.020 mm<sup>3</sup>  
 Theta range for data collection    3.767 to 68.373°.  
 Index ranges    -12<=h<=11, -5<=k<=6, -15<=l<=15  
 Reflections collected 7624  
 Independent reflections    2136 [R(int) = 0.0768]  
 Completeness to theta = 67.000°    98.3 %  
 Absorption correction Semi-empirical from equivalents  
 Max. and min. transmission    0.929 and 0.753  
 Refinement method    Full-matrix least-squares on F<sup>2</sup>  
 Data / restraints / parameters 2136 / 1 / 173  
 Goodness-of-fit on F<sup>2</sup> 1.036  
 Final R indices [I>2sigma(I)] R1 = 0.0417, wR2 = 0.0984  
 R indices (all data)    R1 = 0.0490, wR2 = 0.1019  
 Absolute structure parameter 0.1(3)  
 Extinction coefficient n/a  
 Largest diff. peak and hole    0.245 and -0.208 e.Å<sup>-3</sup>

Table 2. Atomic coordinates ( x 10<sup>4</sup>) and equivalent isotropic displacement parameters (Å<sup>2</sup>x 10<sup>3</sup>) for Compound ent-14. U(eq) is defined as one third of the trace of the orthogonalized U<sub>ij</sub> tensor.

|       | x       | y       | z       | U(eq) |
|-------|---------|---------|---------|-------|
| C(1)  | 6156(3) | 4049(5) | 2954(2) | 15(1) |
| C(2)  | 4750(3) | 5393(5) | 2755(2) | 16(1) |
| C(3)  | 3405(3) | 4891(5) | 1948(2) | 19(1) |
| C(4)  | 2255(3) | 6421(6) | 1897(2) | 22(1) |
| C(5)  | 2456(3) | 8427(6) | 2634(3) | 24(1) |
| C(6)  | 3808(3) | 8942(5) | 3437(3) | 21(1) |
| C(7)  | 4955(3) | 7421(5) | 3497(2) | 16(1) |
| C(8)  | 6466(3) | 7433(5) | 4243(2) | 17(1) |
| C(9)  | 7480(3) | 8427(5) | 5207(2) | 19(1) |
| C(10) | 8470(3) | 5302(5) | 4696(2) | 19(1) |
| C(11) | 6606(3) | 3997(5) | 1905(2) | 15(1) |
| C(12) | 8191(3) | 3341(5) | 2216(2) | 16(1) |
| C(13) | 8525(3) | 3201(5) | 1131(2) | 20(1) |
| C(14) | 8135(3) | 5664(6) | 498(3)  | 23(1) |
| C(15) | 6306(3) | 6429(5) | 1232(2) | 20(1) |
| N(1)  | 8737(3) | 7062(5) | 5484(2) | 20(1) |
| N(2)  | 7128(3) | 5478(4) | 3931(2) | 16(1) |
| O(1)  | 6651(2) | 6211(4) | 227(2)  | 23(1) |
| O(2)  | 8513(2) | 1082(4) | 2836(2) | 20(1) |

Table 3. Bond lengths [Å] and angles [°] for Compound ent-14.

|                 |          |                    |          |
|-----------------|----------|--------------------|----------|
| C(1)-N(2)       | 1.477(3) | C(10)-N(1)         | 1.330(4) |
| C(1)-C(2)       | 1.517(4) | C(10)-N(2)         | 1.337(4) |
| C(1)-C(11)      | 1.546(4) | C(10)-H(10)        | 0.9500   |
| C(1)-H(1)       | 1.0000   | C(11)-C(12)        | 1.526(3) |
| C(2)-C(3)       | 1.383(4) | C(11)-C(15)        | 1.533(4) |
| C(2)-C(7)       | 1.406(4) | C(11)-H(11)        | 1.0000   |
| C(3)-C(4)       | 1.397(4) | C(12)-O(2)         | 1.421(3) |
| C(3)-H(3)       | 0.9500   | C(12)-C(13)        | 1.525(4) |
| C(4)-C(5)       | 1.394(4) | C(12)-H(12)        | 1.0000   |
| C(4)-H(4)       | 0.9500   | C(13)-C(14)        | 1.527(4) |
| C(5)-C(6)       | 1.387(4) | C(13)-H(13A)       | 0.9900   |
| C(5)-H(5)       | 0.9500   | C(13)-H(13B)       | 0.9900   |
| C(6)-C(7)       | 1.388(4) | C(14)-O(1)         | 1.424(3) |
| C(6)-H(6)       | 0.9500   | C(14)-H(14A)       | 0.9900   |
| C(7)-C(8)       | 1.457(4) | C(14)-H(14B)       | 0.9900   |
| C(8)-C(9)       | 1.374(4) | C(15)-O(1)         | 1.435(3) |
| C(8)-N(2)       | 1.378(3) | C(15)-H(15A)       | 0.9900   |
| C(9)-N(1)       | 1.385(4) | C(15)-H(15B)       | 0.9900   |
| C(9)-H(9)       | 0.9500   | O(2)-H(2)          | 0.8400   |
|                 |          |                    |          |
| N(2)-C(1)-C(2)  | 100.0(2) | C(9)-C(8)-N(2)     | 106.1(3) |
| N(2)-C(1)-C(11) | 114.5(2) | C(9)-C(8)-C(7)     | 145.7(3) |
| C(2)-C(1)-C(11) | 114.1(2) | N(2)-C(8)-C(7)     | 107.7(2) |
| N(2)-C(1)-H(1)  | 109.3    | C(8)-C(9)-N(1)     | 108.7(3) |
| C(2)-C(1)-H(1)  | 109.3    | C(8)-C(9)-H(9)     | 125.6    |
| C(11)-C(1)-H(1) | 109.3    | N(1)-C(9)-H(9)     | 125.6    |
| C(3)-C(2)-C(7)  | 120.5(3) | N(1)-C(10)-N(2)    | 111.2(3) |
| C(3)-C(2)-C(1)  | 128.2(3) | N(1)-C(10)-H(10)   | 124.4    |
| C(7)-C(2)-C(1)  | 111.3(2) | N(2)-C(10)-H(10)   | 124.4    |
| C(2)-C(3)-C(4)  | 118.5(3) | C(12)-C(11)-C(15)  | 108.4(2) |
| C(2)-C(3)-H(3)  | 120.7    | C(12)-C(11)-C(1)   | 112.5(2) |
| C(4)-C(3)-H(3)  | 120.7    | C(15)-C(11)-C(1)   | 113.5(2) |
| C(5)-C(4)-C(3)  | 121.0(3) | C(12)-C(11)-H(11)  | 107.4    |
| C(5)-C(4)-H(4)  | 119.5    | C(15)-C(11)-H(11)  | 107.4    |
| C(3)-C(4)-H(4)  | 119.5    | C(1)-C(11)-H(11)   | 107.4    |
| C(6)-C(5)-C(4)  | 120.4(3) | O(2)-C(12)-C(13)   | 111.8(2) |
| C(6)-C(5)-H(5)  | 119.8    | O(2)-C(12)-C(11)   | 110.2(2) |
| C(4)-C(5)-H(5)  | 119.8    | C(13)-C(12)-C(11)  | 109.1(2) |
| C(5)-C(6)-C(7)  | 118.9(3) | O(2)-C(12)-H(12)   | 108.6    |
| C(5)-C(6)-H(6)  | 120.5    | C(13)-C(12)-H(12)  | 108.6    |
| C(7)-C(6)-H(6)  | 120.5    | C(11)-C(12)-H(12)  | 108.6    |
| C(6)-C(7)-C(2)  | 120.6(3) | C(12)-C(13)-C(14)  | 109.1(2) |
| C(6)-C(7)-C(8)  | 132.1(3) | C(12)-C(13)-H(13A) | 109.9    |
| C(2)-C(7)-C(8)  | 107.3(2) | C(14)-C(13)-H(13A) | 109.9    |



|                     |          |                     |          |
|---------------------|----------|---------------------|----------|
| C(12)-C(13)-H(13B)  | 109.9    | C(11)-C(15)-H(15A)  | 109.5    |
| C(14)-C(13)-H(13B)  | 109.9    | O(1)-C(15)-H(15B)   | 109.5    |
| H(13A)-C(13)-H(13B) | 108.3    | C(11)-C(15)-H(15B)  | 109.5    |
| O(1)-C(14)-C(13)    | 110.5(2) | H(15A)-C(15)-H(15B) | 108.1    |
| O(1)-C(14)-H(14A)   | 109.5    | C(10)-N(1)-C(9)     | 106.1(2) |
| C(13)-C(14)-H(14A)  | 109.5    | C(10)-N(2)-C(8)     | 107.9(2) |
| O(1)-C(14)-H(14B)   | 109.5    | C(10)-N(2)-C(1)     | 138.0(2) |
| C(13)-C(14)-H(14B)  | 109.5    | C(8)-N(2)-C(1)      | 113.7(2) |
| H(14A)-C(14)-H(14B) | 108.1    | C(14)-O(1)-C(15)    | 111.7(2) |
| O(1)-C(15)-C(11)    | 110.9(2) | C(12)-O(2)-H(2)     | 109.5    |
| O(1)-C(15)-H(15A)   | 109.5    |                     |          |

---

Symmetry transformations used to generate equivalent atoms:

Table 4. Anisotropic displacement parameters ( $\text{\AA}^2 \times 10^3$ ) for Compound ent-14. The anisotropic displacement factor exponent takes the form:  $-2 \sin^2 \theta [h^2 a^2 U_{11} + \dots + 2 h k a^* b^* U_{12}]$

|       | U11   | U22   | U33   | U23   | U13   | U12   |
|-------|-------|-------|-------|-------|-------|-------|
| C(1)  | 13(1) | 17(1) | 15(1) | -1(1) | 3(1)  | -1(1) |
| C(2)  | 17(1) | 15(1) | 18(1) | 2(1)  | 9(1)  | 0(1)  |
| C(3)  | 15(1) | 22(2) | 18(1) | 1(1)  | 3(1)  | -2(1) |
| C(4)  | 15(1) | 29(2) | 22(1) | 5(1)  | 6(1)  | -2(1) |
| C(5)  | 22(2) | 29(2) | 24(1) | 9(1)  | 13(1) | 8(1)  |
| C(6)  | 26(2) | 20(2) | 22(1) | 1(1)  | 14(1) | 3(1)  |
| C(7)  | 18(1) | 16(1) | 16(1) | 3(1)  | 9(1)  | -2(1) |
| C(8)  | 22(2) | 14(1) | 18(1) | 3(1)  | 11(1) | 2(1)  |
| C(9)  | 22(1) | 18(1) | 18(1) | -4(1) | 10(1) | -4(1) |
| C(10) | 18(1) | 23(2) | 18(1) | 0(1)  | 7(1)  | 0(1)  |
| C(11) | 17(1) | 14(1) | 15(1) | -3(1) | 6(1)  | 0(1)  |
| C(12) | 16(1) | 14(1) | 16(1) | 0(1)  | 4(1)  | 0(1)  |
| C(13) | 19(1) | 19(1) | 20(1) | 2(1)  | 7(1)  | 4(1)  |
| C(14) | 22(1) | 26(2) | 24(1) | 7(1)  | 11(1) | 6(1)  |
| C(15) | 19(1) | 20(2) | 20(1) | 2(1)  | 8(1)  | 4(1)  |
| N(1)  | 15(1) | 27(1) | 17(1) | -2(1) | 4(1)  | -3(1) |
| N(2)  | 17(1) | 16(1) | 15(1) | -2(1) | 6(1)  | 0(1)  |
| O(1)  | 21(1) | 31(1) | 19(1) | 6(1)  | 9(1)  | 7(1)  |
| O(2)  | 20(1) | 18(1) | 20(1) | 3(1)  | 4(1)  | 2(1)  |

Table 5. Hydrogen coordinates (  $\times 10^4$ ) and isotropic displacement parameters ( $\text{\AA}^2 \times 10^3$ ) for Compound ent-14.

---

|        | x    | y     | z    | U(eq) |    |
|--------|------|-------|------|-------|----|
| H(1)   | 6081 | 2314  | 3203 | 18    |    |
| H(3)   | 3266 | 3534  | 1439 | 23    |    |
| H(4)   | 1323 | 6089  | 1352 | 27    |    |
| H(5)   | 1661 | 9448  | 2586 | 28    |    |
| H(6)   | 3947 | 10314 | 3937 | 25    |    |
| H(9)   | 7342 | 9820  | 5615 | 22    |    |
| H(10)  | 9144 | 4078  | 4679 | 23    |    |
| H(11)  | 6027 | 2675  | 1382 | 18    |    |
| H(12)  | 8790 | 4686  | 2710 | 19    |    |
| H(13A) |      | 7964  | 1846 | 639   | 23 |
| H(13B) |      | 9561  | 2850 | 1325  | 23 |
| H(14A) |      | 8730  | 7002 | 980   | 28 |
| H(14B) |      | 8341  | 5581 | -211  | 28 |
| H(15A) |      | 5277  | 6869 | 1013  | 24 |
| H(15B) |      | 6887  | 7773 | 1720  | 24 |
| H(2)   | 9344 | 1160  | 3338 | 30    |    |

---

### **Experimental data for SC-XRD on Compound 20**

X-ray quality crystals were grown from a saturated 1,2-dichloroethane/ethanol/methanol solution followed by the slow vapor diffusion of diisopropyl ether to deposit the crystal diffracted. A colorless needle 0.040 x 0.010 x 0.010 mm in size was mounted on a Cryoloop with Paratone oil. Data were collected in a nitrogen gas stream at 100(2) K using and scans. Crystal-to-detector distance was 60 mm and exposure time was 30 seconds per frame using a scan width of 2.0°. Data collection was 98.1% complete to 50.000° in theta. A total of 9062 reflections were collected covering the indices,  $-13 \leq h \leq 13$ ,  $-4 \leq k \leq 4$ ,  $-15 \leq l \leq 15$ . 2151 reflections were found to be symmetry independent, with an  $R_{\text{int}}$  of 0.0871. Indexing and unit cell refinement indicated a primitive, monoclinic lattice. The space group was found to be P 21 (No. 4). The data were integrated using the Bruker SAINT software program and scaled using the SADABS software program. Solution by iterative methods (SHELXT-2014) produced a complete heavy-atom phasing model consistent with the proposed structure. All non-hydrogen atoms were refined anisotropically by full-matrix least-squares (SHELXL-2014). All hydrogen atoms were placed using a riding model. Their positions were constrained relative to their parent atom using the appropriate HFIX command in SHELXL-2014.



Table 2. Atomic coordinates (  $\times 10^4$ ) and equivalent isotropic displacement parameters ( $\text{\AA}^2 \times 10^3$ ) for Compound 20.  $U(\text{eq})$  is defined as one third of the trace of the orthogonalized  $U_{ij}$  tensor.

|       | x       | y         | z         | $U(\text{eq})$ |
|-------|---------|-----------|-----------|----------------|
| C(1)  | 2654(4) |           | 6225(15)  | 2139(3) 19(2)  |
| C(2)  | 2090(5) |           | 8453(15)  | 1593(4) 23(2)  |
| C(3)  | 1124(4) |           | 9357(15)  | 1561(4) 26(2)  |
| C(4)  | 745(4)  | 11403(16) | 985(4)    | 28(2)          |
| C(5)  | 1309(5) |           | 12477(14) | 451(4) 27(2)   |
| C(6)  | 2262(4) |           | 11530(15) | 473(4) 24(2)   |
| C(7)  | 2637(4) |           | 9533(15)  | 1040(4) 22(2)  |
| C(8)  | 3571(5) |           | 8079(15)  | 1164(4) 25(2)  |
| C(9)  | 4436(5) |           | 7757(16)  | 906(4) 28(2)   |
| C(10) | 4380(5) |           | 4698(15)  | 1889(4) 24(2)  |
| C(11) | 2895(4) |           | 6567(14)  | 3133(3) 21(2)  |
| C(12) | 3333(4) |           | 9244(15)  | 3459(4) 24(2)  |
| C(13) | 3474(4) |           | 9450(14)  | 4443(4) 20(2)  |
| C(14) | 4154(4) |           | 11261(15) | 4907(4) 23(2)  |
| C(15) | 3792(5) |           | 10135(15) | 6192(4) 26(2)  |
| C(16) | 3124(4) |           | 8233(15)  | 5804(4) 26(2)  |
| C(17) | 2942(4) |           | 7880(14)  | 4903(4) 21(2)  |
| C(18) | 2192(4) |           | 5826(14)  | 4460(3) 22(2)  |
| C(19) | 1950(4) |           | 6083(16)  | 3472(3) 25(2)  |
| C(20) | 8454(4) |           | -129(15)  | 2478(4) 23(2)  |
| C(21) | 9264(4) |           | 1504(15)  | 2781(4) 27(2)  |
| C(22) | 9867(4) |           | 1103(16)  | 3616(4) 29(2)  |
| C(23) | 9661(5) |           | -858(14)  | 4130(4) 27(2)  |
| C(24) | 8853(5) |           | -2516(14) | 3829(4) 31(2)  |
| C(25) | 8258(5) |           | -2156(14) | 3007(4) 26(2)  |
| C(26) | 7762(4) |           | 280(14)   | 1602(4) 26(2)  |
| C(27) | 6821(4) |           | 1830(16)  | 1674(4) 26(2)  |
| N(1)  | 4920(4) |           | 5649(11)  | 1365(3) 24(2)  |
| N(2)  | 3554(4) |           | 6141(12)  | 1776(3) 21(1)  |
| N(3)  | 4318(3) |           | 11627(12) | 5768(3) 25(2)  |
| O(1)  | 4218(3) |           | 9906(10)  | 3193(2) 26(1)  |
| O(2)  | 8254(3) |           | 1604(11)  | 1024(2) 35(1)  |
| O(3)  | 6635(3) |           | 3913(10)  | 1200(3) 32(1)  |
| O(4)  | 6311(3) |           | 1015(11)  | 2168(3) 35(1)  |

Table 3. Bond lengths [Å] and angles [°] for Compound 20.

|                 |          |                |          |
|-----------------|----------|----------------|----------|
| C(1)-N(2)       | 1.483(7) | C(15)-N(3)     | 1.333(8) |
| C(1)-C(2)       | 1.524(9) | C(15)-C(16)    | 1.378(9) |
| C(1)-C(11)      | 1.545(8) | C(15)-H(15)    | 0.9500   |
| C(1)-H(1)       | 1.0000   | C(16)-C(17)    | 1.404(8) |
| C(2)-C(7)       | 1.393(9) | C(16)-H(16)    | 0.9500   |
| C(2)-C(3)       | 1.397(8) | C(17)-C(18)    | 1.521(9) |
| C(3)-C(4)       | 1.401(9) | C(18)-C(19)    | 1.532(8) |
| C(3)-H(3)       | 0.9500   | C(18)-H(18A)   | 0.9900   |
| C(4)-C(5)       | 1.386(9) | C(18)-H(18B)   | 0.9900   |
| C(4)-H(4)       | 0.9500   | C(19)-H(19A)   | 0.9900   |
| C(5)-C(6)       | 1.391(8) | C(19)-H(19B)   | 0.9900   |
| C(5)-H(5)       | 0.9500   | C(20)-C(21)    | 1.385(8) |
| C(6)-C(7)       | 1.374(9) | C(20)-C(25)    | 1.393(9) |
| C(6)-H(6)       | 0.9500   | C(20)-C(26)    | 1.508(8) |
| C(7)-C(8)       | 1.457(9) | C(21)-C(22)    | 1.408(8) |
| C(8)-C(9)       | 1.356(8) | C(21)-H(21)    | 0.9500   |
| C(8)-N(2)       | 1.386(8) | C(22)-C(23)    | 1.357(9) |
| C(9)-N(1)       | 1.376(8) | C(22)-H(22)    | 0.9500   |
| C(9)-H(9)       | 0.9500   | C(23)-C(24)    | 1.389(9) |
| C(10)-N(1)      | 1.328(7) | C(23)-H(23)    | 0.9500   |
| C(10)-N(2)      | 1.330(8) | C(24)-C(25)    | 1.384(8) |
| C(10)-H(10)     | 0.9500   | C(24)-H(24)    | 0.9500   |
| C(11)-C(12)     | 1.527(9) | C(25)-H(25)    | 0.9500   |
| C(11)-C(19)     | 1.537(8) | C(26)-O(2)     | 1.428(7) |
| C(11)-H(11)     | 1.0000   | C(26)-C(27)    | 1.542(9) |
| C(12)-O(1)      | 1.420(7) | C(26)-H(26)    | 1.0000   |
| C(12)-C(13)     | 1.531(8) | C(27)-O(4)     | 1.237(8) |
| C(12)-H(12)     | 1.0000   | C(27)-O(3)     | 1.288(8) |
| C(13)-C(14)     | 1.396(8) | N(1)-H(1A)     | 0.8800   |
| C(13)-C(17)     | 1.396(9) | O(1)-H(1A)     | 0.8400   |
| C(14)-N(3)      | 1.344(7) | O(2)-H(2)      | 0.8400   |
| C(14)-H(14)     | 0.9500   |                |          |
| N(2)-C(1)-C(2)  | 99.4(5)  | C(4)-C(3)-H(3) | 120.8    |
| N(2)-C(1)-C(11) | 113.4(4) | C(5)-C(4)-C(3) | 120.8(6) |
| C(2)-C(1)-C(11) | 117.3(6) | C(5)-C(4)-H(4) | 119.6    |
| N(2)-C(1)-H(1)  | 108.7    | C(3)-C(4)-H(4) | 119.6    |
| C(2)-C(1)-H(1)  | 108.7    | C(4)-C(5)-C(6) | 120.4(7) |
| C(11)-C(1)-H(1) | 108.7    | C(4)-C(5)-H(5) | 119.8    |
| C(7)-C(2)-C(3)  | 119.7(6) | C(6)-C(5)-H(5) | 119.8    |
| C(7)-C(2)-C(1)  | 111.7(6) | C(7)-C(6)-C(5) | 118.8(6) |
| C(3)-C(2)-C(1)  | 128.4(6) | C(7)-C(6)-H(6) | 120.6    |
| C(2)-C(3)-C(4)  | 118.4(6) | C(5)-C(6)-H(6) | 120.6    |
| C(2)-C(3)-H(3)  | 120.8    | C(6)-C(7)-C(2) | 121.7(6) |

|                    |          |                     |          |
|--------------------|----------|---------------------|----------|
| C(6)-C(7)-C(8)     | 130.5(6) | H(18A)-C(18)-H(18B) | 107.9    |
| C(2)-C(7)-C(8)     | 107.7(6) | C(18)-C(19)-C(11)   | 111.6(5) |
| C(9)-C(8)-N(2)     | 106.5(6) | C(18)-C(19)-H(19A)  | 109.3    |
| C(9)-C(8)-C(7)     | 146.2(7) | C(11)-C(19)-H(19A)  | 109.3    |
| N(2)-C(8)-C(7)     | 107.3(6) | C(18)-C(19)-H(19B)  | 109.3    |
| C(8)-C(9)-N(1)     | 106.7(6) | C(11)-C(19)-H(19B)  | 109.3    |
| C(8)-C(9)-H(9)     | 126.7    | H(19A)-C(19)-H(19B) | 108.0    |
| N(1)-C(9)-H(9)     | 126.7    | C(21)-C(20)-C(25)   | 119.0(5) |
| N(1)-C(10)-N(2)    | 107.5(6) | C(21)-C(20)-C(26)   | 121.8(6) |
| N(1)-C(10)-H(10)   | 126.3    | C(25)-C(20)-C(26)   | 119.2(6) |
| N(2)-C(10)-H(10)   | 126.3    | C(20)-C(21)-C(22)   | 119.6(6) |
| C(12)-C(11)-C(19)  | 108.9(5) | C(20)-C(21)-H(21)   | 120.2    |
| C(12)-C(11)-C(1)   | 114.9(5) | C(22)-C(21)-H(21)   | 120.2    |
| C(19)-C(11)-C(1)   | 109.7(4) | C(23)-C(22)-C(21)   | 120.8(7) |
| C(12)-C(11)-H(11)  | 107.7    | C(23)-C(22)-H(22)   | 119.6    |
| C(19)-C(11)-H(11)  | 107.7    | C(21)-C(22)-H(22)   | 119.6    |
| C(1)-C(11)-H(11)   | 107.7    | C(22)-C(23)-C(24)   | 119.9(6) |
| O(1)-C(12)-C(11)   | 114.2(5) | C(22)-C(23)-H(23)   | 120.1    |
| O(1)-C(12)-C(13)   | 111.8(5) | C(24)-C(23)-H(23)   | 120.1    |
| C(11)-C(12)-C(13)  | 110.7(5) | C(25)-C(24)-C(23)   | 119.9(6) |
| O(1)-C(12)-H(12)   | 106.6    | C(25)-C(24)-H(24)   | 120.0    |
| C(11)-C(12)-H(12)  | 106.6    | C(23)-C(24)-H(24)   | 120.0    |
| C(13)-C(12)-H(12)  | 106.6    | C(24)-C(25)-C(20)   | 120.7(6) |
| C(14)-C(13)-C(17)  | 118.0(5) | C(24)-C(25)-H(25)   | 119.7    |
| C(14)-C(13)-C(12)  | 119.7(6) | C(20)-C(25)-H(25)   | 119.7    |
| C(17)-C(13)-C(12)  | 122.3(6) | O(2)-C(26)-C(20)    | 111.3(5) |
| N(3)-C(14)-C(13)   | 124.2(6) | O(2)-C(26)-C(27)    | 109.8(6) |
| N(3)-C(14)-H(14)   | 117.9    | C(20)-C(26)-C(27)   | 111.5(5) |
| C(13)-C(14)-H(14)  | 117.9    | O(2)-C(26)-H(26)    | 108.0    |
| N(3)-C(15)-C(16)   | 123.8(6) | C(20)-C(26)-H(26)   | 108.0    |
| N(3)-C(15)-H(15)   | 118.1    | C(27)-C(26)-H(26)   | 108.0    |
| C(16)-C(15)-H(15)  | 118.1    | O(4)-C(27)-O(3)     | 125.3(6) |
| C(15)-C(16)-C(17)  | 119.3(6) | O(4)-C(27)-C(26)    | 119.0(7) |
| C(15)-C(16)-H(16)  | 120.3    | O(3)-C(27)-C(26)    | 115.6(6) |
| C(17)-C(16)-H(16)  | 120.3    | C(10)-N(1)-C(9)     | 109.9(5) |
| C(13)-C(17)-C(16)  | 117.8(6) | C(10)-N(1)-H(1A)    | 125.1    |
| C(13)-C(17)-C(18)  | 122.2(5) | C(9)-N(1)-H(1A)     | 125.1    |
| C(16)-C(17)-C(18)  | 120.0(6) | C(10)-N(2)-C(8)     | 109.5(5) |
| C(17)-C(18)-C(19)  | 112.3(5) | C(10)-N(2)-C(1)     | 136.8(6) |
| C(17)-C(18)-H(18A) | 109.1    | C(8)-N(2)-C(1)      | 113.7(5) |
| C(19)-C(18)-H(18A) | 109.1    | C(15)-N(3)-C(14)    | 116.8(6) |
| C(17)-C(18)-H(18B) | 109.1    | C(12)-O(1)-H(1A)    | 109.5    |
| C(19)-C(18)-H(18B) | 109.1    | C(26)-O(2)-H(2)     | 109.5    |

---

Symmetry transformations used to generate equivalent atoms:



Table 4. Anisotropic displacement parameters ( $\text{\AA}^2 \times 10^3$ ) for Compound 20. The anisotropic displacement factor exponent takes the form:  $-2h^2a^2U_{11} + \dots + 2hkab^*U_{12}$

|       | U11   | U22   | U33   | U23    | U13   | U12    |
|-------|-------|-------|-------|--------|-------|--------|
| C(1)  | 16(3) | 19(5) | 21(3) | 0(3)   | 1(3)  | 2(4)   |
| C(2)  | 21(4) | 29(5) | 17(4) | -5(3)  | -3(3) | -2(4)  |
| C(3)  | 22(4) | 34(6) | 20(4) | -4(4)  | 0(3)  | -5(4)  |
| C(4)  | 14(3) | 41(6) | 23(4) | -5(4)  | -7(3) | 5(4)   |
| C(5)  | 29(4) | 29(6) | 20(4) | -8(3)  | -2(3) | 4(4)   |
| C(6)  | 21(4) | 33(5) | 17(4) | -9(4)  | 2(3)  | 2(4)   |
| C(7)  | 19(4) | 27(5) | 16(4) | -2(4)  | -1(3) | 5(4)   |
| C(8)  | 30(5) | 32(5) | 9(4)  | -1(4)  | -4(3) | 2(4)   |
| C(9)  | 19(4) | 45(6) | 18(4) | -1(4)  | 4(3)  | 3(4)   |
| C(10) | 24(4) | 28(5) | 16(4) | -4(4)  | -1(3) | -5(4)  |
| C(11) | 17(3) | 25(5) | 20(4) | 3(4)   | 3(3)  | -1(4)  |
| C(12) | 18(4) | 31(6) | 22(4) | -3(4)  | 2(3)  | -10(4) |
| C(13) | 16(4) | 20(5) | 21(4) | -1(4)  | 1(3)  | 4(4)   |
| C(14) | 19(4) | 23(5) | 25(4) | 2(4)   | 0(3)  | 0(4)   |
| C(15) | 20(4) | 38(6) | 18(4) | -2(4)  | 1(3)  | 7(4)   |
| C(16) | 21(4) | 33(5) | 22(4) | 6(4)   | 2(3)  | 4(4)   |
| C(17) | 12(3) | 26(5) | 22(4) | -1(4)  | 0(3)  | 7(4)   |
| C(18) | 19(4) | 20(5) | 27(4) | 2(3)   | 7(3)  | -1(3)  |
| C(19) | 26(4) | 25(5) | 22(4) | -8(4)  | 3(3)  | -1(4)  |
| C(20) | 18(4) | 29(5) | 21(4) | -4(4)  | 1(3)  | 3(4)   |
| C(21) | 28(4) | 30(5) | 26(4) | 2(4)   | 11(3) | 6(4)   |
| C(22) | 22(4) | 39(6) | 28(4) | -1(4)  | 7(3)  | -6(4)  |
| C(23) | 21(4) | 35(6) | 23(4) | -3(4)  | 1(3)  | -2(4)  |
| C(24) | 36(4) | 34(6) | 23(4) | 3(4)   | 4(3)  | -1(4)  |
| C(25) | 26(4) | 24(5) | 25(4) | -4(4)  | -1(3) | -2(4)  |
| C(26) | 25(4) | 32(6) | 23(4) | 1(3)   | 9(3)  | 1(4)   |
| C(27) | 17(4) | 37(6) | 23(4) | -15(4) | 0(3)  | -8(4)  |
| N(1)  | 16(3) | 33(5) | 23(3) | 0(3)   | 1(3)  | 6(3)   |
| N(2)  | 15(3) | 30(4) | 17(3) | -5(3)  | 1(2)  | 4(3)   |
| N(3)  | 19(3) | 35(4) | 18(3) | 0(3)   | -2(2) | 2(3)   |
| O(1)  | 20(2) | 34(4) | 21(2) | 6(2)   | 0(2)  | -6(2)  |
| O(2)  | 32(3) | 46(4) | 27(3) | 9(3)   | 6(2)  | 12(3)  |
| O(3)  | 28(3) | 35(4) | 30(3) | 8(3)   | 3(2)  | 6(3)   |
| O(4)  | 24(3) | 50(4) | 31(3) | 4(3)   | 8(2)  | 5(3)   |

Table 5. Hydrogen coordinates (  $\times 10^4$ ) and isotropic displacement parameters ( $\text{\AA}^2 \times 10^3$ ) for Compound 20.

|        | x     | y     | z    | U(eq) |    |
|--------|-------|-------|------|-------|----|
| H(1)   | 2272  | 4549  | 1986 | 23    |    |
| H(3)   | 733   | 8603  | 1920 | 31    |    |
| H(4)   | 94    | 12062 | 961  | 33    |    |
| H(5)   | 1042  | 13870 | 67   | 33    |    |
| H(6)   | 2646  | 12252 | 103  | 29    |    |
| H(9)   | 4665  | 8787  | 490  | 33    |    |
| H(10)  | 4552  | 3251  | 2275 | 28    |    |
| H(11)  | 3393  | 5187  | 3390 | 25    |    |
| H(12)  | 2823  | 10596 | 3200 | 29    |    |
| H(14)  | 4525  | 12303 | 4595 | 28    |    |
| H(15)  | 3882  | 10399 | 6799 | 31    |    |
| H(16)  | 2790  | 7170  | 6141 | 31    |    |
| H(18A) |       | 1569  | 6019 | 4666  | 26 |
| H(18B) |       | 2463  | 4045 | 4625  | 26 |
| H(19A) |       | 1479  | 7563 | 3294  | 29 |
| H(19B) |       | 1620  | 4449 | 3209  | 29 |
| H(21)  | 9412  | 2889  | 2427 | 32    |    |
| H(22)  | 10425 | 2218  | 3823 | 35    |    |
| H(23)  | 10069 | -1097 | 4695 | 33    |    |
| H(24)  | 8710  | -3895 | 4187 | 38    |    |
| H(25)  | 7710  | -3304 | 2802 | 31    |    |
| H(26)  | 7546  | -1492 | 1352 | 31    |    |
| H(1A)  | 5501  | 5024  | 1317 | 29    |    |
| H(1A)  | 4700  | 9057  | 3491 | 38    |    |
| H(2)   | 7897  | 2857  | 783  | 53    |    |

### **Experimental data for SC-XRD on Compound ent-21**

X-ray quality crystals were grown from a saturated 1,2-dichloroethane/ethanol/methanol solution followed by the slow vapor diffusion of diisopropyl ether to deposit the crystal diffracted. A colorless blade 0.050 x 0.030 x 0.020 mm in size was mounted on a Cryoloop with Paratone oil. Data were collected in a nitrogen gas stream at 100(2) K using and scans. Crystal-to-detector distance was 60 mm and exposure time was 10 seconds per frame using a scan width of 2.0°. Data collection was 100.0% complete to 67.000° in theta. A total of 22900 reflections were collected covering the indices,  $-11 \leq h \leq 11$ ,  $-6 \leq k \leq 6$ ,  $-16 \leq l \leq 16$ . 2697 reflections were found to be symmetry independent, with an  $R_{\text{int}}$  of 0.0457. Indexing and unit cell refinement indicated a primitive, monoclinic lattice. The space group was found to be P 21 (No. 4). The data were integrated using the Bruker SAINT software program and scaled using the SADABS software program. Solution by iterative methods (SHELXT-2014) produced a complete heavy-atom phasing model consistent with the proposed structure. All non-hydrogen atoms were refined anisotropically by full-matrix least-squares (SHELXL-2014). All hydrogen atoms were placed using a riding model. Their positions were constrained relative to their parent atom using the appropriate HFIX command in SHELXL-2014. Absolute stereochemistry was unambiguously determined to be *R* at all chiral centers.

Table 1. Crystal data and structure refinement for Compound ent-21.

X-ray ID        Compound ent-21  
Sample/notebook ID    Compound ent-21  
Empirical formula     C<sub>20</sub>H<sub>18</sub>N<sub>2</sub>O  
Formula weight        302.36  
Temperature    100(2) K  
Wavelength    1.54178 Å  
Crystal system        Monoclinic  
Space group    P 21  
Unit cell dimensions   a = 9.8446(8) Å        alpha = 90°.  
                              b = 5.8701(5) Å        beta = 101.772(6)°.  
                              c = 13.6268(11) Å     gamma = 90°.  
Volume        770.91(11) Å<sup>3</sup>  
Z            2  
Density (calculated)   1.303 Mg/m<sup>3</sup>  
Absorption coefficient    0.638 mm<sup>-1</sup>  
F(000) 320  
Crystal size    0.050 x 0.030 x 0.020 mm<sup>3</sup>  
Theta range for data collection    3.313 to 68.234°.  
Index ranges   -11<=h<=11, -6<=k<=6, -16<=l<=16  
Reflections collected   22900  
Independent reflections    2697 [R(int) = 0.0457]  
Completeness to theta = 67.000°    100.0 %  
Absorption correction   Semi-empirical from equivalents  
Max. and min. transmission   0.929 and 0.797  
Refinement method    Full-matrix least-squares on F<sup>2</sup>  
Data / restraints / parameters   2697 / 1 / 209  
Goodness-of-fit on F<sup>2</sup> 1.050  
Final R indices [I>2sigma(I)]   R1 = 0.0313, wR2 = 0.0656  
R indices (all data)    R1 = 0.0373, wR2 = 0.0690  
Absolute structure parameter   0.03(16)  
Extinction coefficient   n/a  
Largest diff. peak and hole   0.150 and -0.110 e.Å<sup>-3</sup>

Table 2. Atomic coordinates ( x 104) and equivalent isotropic displacement parameters ( $\text{\AA}^2 \times 10^3$ ) for Compound ent-21. U(eq) is defined as one third of the trace of the orthogonalized  $U_{ij}$  tensor.

|       | x        | y        | z       | U(eq) |
|-------|----------|----------|---------|-------|
| C(1)  | 7356(2)  | -72(4)   | 3246(2) | 28(1) |
| C(2)  | 8695(2)  | -1194(5) | 3105(2) | 28(1) |
| C(3)  | 9499(2)  | -694(5)  | 2406(2) | 33(1) |
| C(4)  | 10627(2) | -2083(5) | 2359(2) | 37(1) |
| C(5)  | 10950(3) | -3927(5) | 2994(2) | 39(1) |
| C(6)  | 10155(2) | -4441(5) | 3702(2) | 36(1) |
| C(7)  | 9033(2)  | -3058(5) | 3755(2) | 29(1) |
| C(8)  | 8034(2)  | -3113(5) | 4409(2) | 28(1) |
| C(9)  | 7684(2)  | -4058(5) | 5244(2) | 33(1) |
| C(10) | 6286(2)  | -1220(5) | 4799(2) | 31(1) |
| C(11) | 6169(2)  | -441(4)  | 2330(2) | 26(1) |
| C(12) | 4757(2)  | 361(4)   | 2507(2) | 27(1) |
| C(13) | 3700(2)  | 262(4)   | 1522(2) | 28(1) |
| C(14) | 2676(2)  | 1913(5)  | 1274(2) | 34(1) |
| C(15) | 1687(2)  | 1784(5)  | 393(2)  | 38(1) |
| C(16) | 1695(2)  | -47(5)   | -244(2) | 35(1) |
| C(17) | 2714(2)  | -1686(5) | -8(2)   | 32(1) |
| C(18) | 3750(2)  | -1536(5) | 855(2)  | 27(1) |
| C(19) | 4955(2)  | -3172(5) | 1002(2) | 32(1) |
| C(20) | 6004(2)  | -2915(5) | 1988(2) | 30(1) |
| N(1)  | 6586(2)  | -2858(4) | 5481(1) | 33(1) |
| N(2)  | 7130(2)  | -1331(4) | 4137(1) | 28(1) |
| O(1)  | 4849(2)  | 2542(3)  | 2953(1) | 33(1) |

Table 3. Bond lengths [ $\text{\AA}$ ] and angles [ $^\circ$ ] for Compound ent-21.

|                  |            |                   |            |
|------------------|------------|-------------------|------------|
| C(1)-N(2)        | 1.477(3)   | C(11)-C(12)       | 1.533(3)   |
| C(1)-C(2)        | 1.521(3)   | C(11)-H(11)       | 1.0000     |
| C(1)-C(11)       | 1.542(3)   | C(12)-O(1)        | 1.412(3)   |
| C(1)-H(1A)       | 1.0000     | C(12)-C(13)       | 1.523(3)   |
| C(2)-C(3)        | 1.388(3)   | C(12)-H(12)       | 1.0000     |
| C(2)-C(7)        | 1.404(3)   | C(13)-C(14)       | 1.389(3)   |
| C(3)-C(4)        | 1.390(4)   | C(13)-C(18)       | 1.400(3)   |
| C(3)-H(3)        | 0.9500     | C(14)-C(15)       | 1.385(3)   |
| C(4)-C(5)        | 1.381(4)   | C(14)-H(14)       | 0.9500     |
| C(4)-H(4)        | 0.9500     | C(15)-C(16)       | 1.383(4)   |
| C(5)-C(6)        | 1.395(3)   | C(15)-H(15)       | 0.9500     |
| C(5)-H(5)        | 0.9500     | C(16)-C(17)       | 1.380(4)   |
| C(6)-C(7)        | 1.384(3)   | C(16)-H(16)       | 0.9500     |
| C(6)-H(6)        | 0.9500     | C(17)-C(18)       | 1.394(3)   |
| C(7)-C(8)        | 1.456(3)   | C(17)-H(17)       | 0.9500     |
| C(8)-C(9)        | 1.371(3)   | C(18)-C(19)       | 1.508(3)   |
| C(8)-N(2)        | 1.374(3)   | C(19)-C(20)       | 1.525(3)   |
| C(9)-N(1)        | 1.383(3)   | C(19)-H(19A)      | 0.9900     |
| C(9)-H(9)        | 0.9500     | C(19)-H(19B)      | 0.9900     |
| C(10)-N(1)       | 1.328(3)   | C(20)-H(20A)      | 0.9900     |
| C(10)-N(2)       | 1.347(3)   | C(20)-H(20B)      | 0.9900     |
| C(10)-H(10)      | 0.9500     | O(1)-H(1)         | 0.8400     |
| C(11)-C(20)      | 1.524(4)   |                   |            |
|                  |            |                   |            |
| N(2)-C(1)-C(2)   | 99.62(18)  | C(5)-C(6)-H(6)    | 120.8      |
| N(2)-C(1)-C(11)  | 112.26(19) | C(6)-C(7)-C(2)    | 120.9(2)   |
| C(2)-C(1)-C(11)  | 111.73(18) | C(6)-C(7)-C(8)    | 131.6(2)   |
| N(2)-C(1)-H(1A)  | 110.9      | C(2)-C(7)-C(8)    | 107.5(2)   |
| C(2)-C(1)-H(1A)  | 110.9      | C(9)-C(8)-N(2)    | 105.9(2)   |
| C(11)-C(1)-H(1A) | 110.9      | C(9)-C(8)-C(7)    | 146.3(2)   |
| C(3)-C(2)-C(7)   | 120.2(2)   | N(2)-C(8)-C(7)    | 107.4(2)   |
| C(3)-C(2)-C(1)   | 128.7(2)   | C(8)-C(9)-N(1)    | 109.2(2)   |
| C(7)-C(2)-C(1)   | 110.96(19) | C(8)-C(9)-H(9)    | 125.4      |
| C(2)-C(3)-C(4)   | 118.7(2)   | N(1)-C(9)-H(9)    | 125.4      |
| C(2)-C(3)-H(3)   | 120.6      | N(1)-C(10)-N(2)   | 110.7(2)   |
| C(4)-C(3)-H(3)   | 120.6      | N(1)-C(10)-H(10)  | 124.6      |
| C(5)-C(4)-C(3)   | 121.0(2)   | N(2)-C(10)-H(10)  | 124.6      |
| C(5)-C(4)-H(4)   | 119.5      | C(20)-C(11)-C(12) | 107.32(18) |
| C(3)-C(4)-H(4)   | 119.5      | C(20)-C(11)-C(1)  | 113.4(2)   |
| C(4)-C(5)-C(6)   | 120.9(3)   | C(12)-C(11)-C(1)  | 113.05(18) |
| C(4)-C(5)-H(5)   | 119.6      | C(20)-C(11)-H(11) | 107.6      |
| C(6)-C(5)-H(5)   | 119.6      | C(12)-C(11)-H(11) | 107.6      |
| C(7)-C(6)-C(5)   | 118.4(3)   | C(1)-C(11)-H(11)  | 107.6      |
| C(7)-C(6)-H(6)   | 120.8      | O(1)-C(12)-C(13)  | 112.7(2)   |

|                   |            |                     |            |
|-------------------|------------|---------------------|------------|
| O(1)-C(12)-C(11)  | 111.46(19) | C(17)-C(18)-C(13)   | 118.6(2)   |
| C(13)-C(12)-C(11) | 109.14(17) | C(17)-C(18)-C(19)   | 119.5(2)   |
| O(1)-C(12)-H(12)  | 107.8      | C(13)-C(18)-C(19)   | 121.7(2)   |
| C(13)-C(12)-H(12) | 107.8      | C(18)-C(19)-C(20)   | 115.2(2)   |
| C(11)-C(12)-H(12) | 107.8      | C(18)-C(19)-H(19A)  | 108.5      |
| C(14)-C(13)-C(18) | 119.2(2)   | C(20)-C(19)-H(19A)  | 108.5      |
| C(14)-C(13)-C(12) | 121.2(2)   | C(18)-C(19)-H(19B)  | 108.5      |
| C(18)-C(13)-C(12) | 119.5(2)   | C(20)-C(19)-H(19B)  | 108.5      |
| C(15)-C(14)-C(13) | 121.3(2)   | H(19A)-C(19)-H(19B) | 107.5      |
| C(15)-C(14)-H(14) | 119.4      | C(11)-C(20)-C(19)   | 112.0(2)   |
| C(13)-C(14)-H(14) | 119.4      | C(11)-C(20)-H(20A)  | 109.2      |
| C(16)-C(15)-C(14) | 119.6(2)   | C(19)-C(20)-H(20A)  | 109.2      |
| C(16)-C(15)-H(15) | 120.2      | C(11)-C(20)-H(20B)  | 109.2      |
| C(14)-C(15)-H(15) | 120.2      | C(19)-C(20)-H(20B)  | 109.2      |
| C(17)-C(16)-C(15) | 119.5(2)   | H(20A)-C(20)-H(20B) | 107.9      |
| C(17)-C(16)-H(16) | 120.2      | C(10)-N(1)-C(9)     | 106.13(19) |
| C(15)-C(16)-H(16) | 120.2      | C(10)-N(2)-C(8)     | 108.1(2)   |
| C(16)-C(17)-C(18) | 121.6(2)   | C(10)-N(2)-C(1)     | 138.0(2)   |
| C(16)-C(17)-H(17) | 119.2      | C(8)-N(2)-C(1)      | 113.88(18) |
| C(18)-C(17)-H(17) | 119.2      | C(12)-O(1)-H(1)     | 109.5      |

---

Symmetry transformations used to generate equivalent atoms:

Table 4. Anisotropic displacement parameters ( $\text{\AA}^2 \times 10^3$ ) for Compound ent-21. The anisotropic displacement factor exponent takes the form:  $-2 \sum [h^2 a^* 2U_{11} + \dots + 2 h k a^* b^* U_{12}]$

|       | U11   | U22   | U33   | U23    | U13   | U12   |
|-------|-------|-------|-------|--------|-------|-------|
| C(1)  | 31(1) | 31(2) | 22(1) | 3(1)   | 6(1)  | -2(1) |
| C(2)  | 27(1) | 35(2) | 22(1) | -2(1)  | 4(1)  | -4(1) |
| C(3)  | 29(1) | 44(2) | 25(1) | -1(1)  | 5(1)  | -6(1) |
| C(4)  | 29(1) | 55(2) | 26(1) | -6(1)  | 7(1)  | -7(1) |
| C(5)  | 31(1) | 53(2) | 32(1) | -10(1) | 4(1)  | 6(1)  |
| C(6)  | 34(1) | 45(2) | 27(1) | -2(1)  | 2(1)  | 5(1)  |
| C(7)  | 27(1) | 36(2) | 22(1) | -4(1)  | 3(1)  | -2(1) |
| C(8)  | 29(1) | 32(1) | 23(1) | 0(1)   | 3(1)  | -1(1) |
| C(9)  | 34(1) | 38(2) | 26(1) | 3(1)   | 3(1)  | -1(1) |
| C(10) | 30(1) | 39(2) | 24(1) | 1(1)   | 7(1)  | 0(1)  |
| C(11) | 29(1) | 31(1) | 20(1) | 3(1)   | 7(1)  | 1(1)  |
| C(12) | 31(1) | 28(1) | 24(1) | 1(1)   | 12(1) | -1(1) |
| C(13) | 27(1) | 34(2) | 24(1) | 4(1)   | 10(1) | -2(1) |
| C(14) | 32(1) | 39(2) | 33(1) | 0(1)   | 12(1) | 6(1)  |
| C(15) | 28(1) | 46(2) | 40(1) | 9(1)   | 8(1)  | 10(1) |
| C(16) | 26(1) | 53(2) | 28(1) | 6(1)   | 6(1)  | -2(1) |
| C(17) | 30(1) | 41(2) | 25(1) | 0(1)   | 8(1)  | -5(1) |
| C(18) | 26(1) | 34(1) | 23(1) | 3(1)   | 8(1)  | -2(1) |
| C(19) | 32(1) | 35(2) | 29(1) | -4(1)  | 6(1)  | 0(1)  |
| C(20) | 30(1) | 33(2) | 27(1) | 0(1)   | 5(1)  | 2(1)  |
| N(1)  | 32(1) | 43(1) | 24(1) | 5(1)   | 7(1)  | -2(1) |
| N(2)  | 29(1) | 36(1) | 21(1) | 3(1)   | 7(1)  | 0(1)  |
| O(1)  | 38(1) | 32(1) | 30(1) | -5(1)  | 13(1) | -1(1) |



Table 5. Hydrogen coordinates (  $\times 10^4$ ) and isotropic displacement parameters ( $\text{\AA}^2 \times 10^3$ ) for Compound ent-21.

---

|        | x     | y     | z     | U(eq) |    |
|--------|-------|-------|-------|-------|----|
| H(1A)  | 7501  | 1588  | 3398  | 33    |    |
| H(3)   | 9282  | 573   | 1969  | 39    |    |
| H(4)   | 11185 | -1759 | 1883  | 44    |    |
| H(5)   | 11724 | -4857 | 2946  | 46    |    |
| H(6)   | 10378 | -5709 | 4138  | 43    |    |
| H(9)   | 8126  | -5334 | 5602  | 40    |    |
| H(10)  | 5573  | -120  | 4781  | 37    |    |
| H(11)  | 6388  | 475   | 1763  | 31    |    |
| H(12)  | 4453  | -733  | 2982  | 32    |    |
| H(14)  | 2653  | 3153  | 1718  | 41    |    |
| H(15)  | 1008  | 2947  | 228   | 45    |    |
| H(16)  | 1004  | -175  | -840  | 42    |    |
| H(17)  | 2709  | -2949 | -445  | 38    |    |
| H(19A) |       | 5447  | -2970 | 443   | 39 |
| H(19B) |       | 4585  | -4745 | 962   | 39 |
| H(20A) |       | 5697  | -3836 | 2511  | 36 |
| H(20B) |       | 6914  | -3509 | 1903  | 36 |
| H(1)   | 4415  | 2546  | 3424  | 49    |    |

---

### **Experimental data for SC-XRD on Compound ent-22**

X-ray quality crystals were grown from a saturated 1,2-dichloroethane/ethanol/methanol solution followed by the slow vapor diffusion of diisopropyl ether to deposit the crystal diffracted. A yellow plate 0.090 x 0.070 x 0.050 mm in size was mounted on a Cryoloop with Paratone oil. Data were collected in a nitrogen gas stream at 100(2) K using and scans. Crystal-to-detector distance was 60 mm and exposure time was 1 seconds per frame using a scan width of 2.0°. Data collection was 99.6% complete to 67.000° in theta. A total of 20046 reflections were collected covering the indices,  $-6 \leq h \leq 6$ ,  $-11 \leq k \leq 12$ ,  $-32 \leq l \leq 32$ . 2772 reflections were found to be symmetry independent, with an  $R_{\text{int}}$  of 0.0482. Indexing and unit cell refinement indicated a primitive, orthorhombic lattice. The space group was found to be P 21 21 21 (No. 19). The data were integrated using the Bruker SAINT software program and scaled using the SADABS software program. Solution by iterative methods (SHELXT-2014) produced a complete heavy-atom phasing model consistent with the proposed structure. All non-hydrogen atoms were refined anisotropically by full-matrix least-squares (SHELXL-2014). All hydrogen atoms were placed using a riding model. Their positions were constrained relative to their parent atom using the appropriate HFIX command in SHELXL-2014. Absolute stereochemistry was unambiguously determined to be *R* at C1, C11, and C12, respectively.



Table 2. Atomic coordinates (  $\times 10^4$ ) and equivalent isotropic displacement parameters ( $\text{\AA}^2 \times 10^3$ ) for Compound ent-22.  $U(\text{eq})$  is defined as one third of the trace of the orthogonalized  $U_{ij}$  tensor.

|       | x        | y       | z       | $U(\text{eq})$ |
|-------|----------|---------|---------|----------------|
| C(1)  | 1682(5)  |         | 4753(2) | 5888(1) 23(1)  |
| C(2)  | 2901(5)  |         | 3468(2) | 5964(1) 25(1)  |
| C(3)  | 2359(6)  |         | 2559(2) | 6321(1) 32(1)  |
| C(4)  | 3843(7)  |         | 1479(3) | 6340(1) 40(1)  |
| C(5)  | 5828(6)  |         | 1313(3) | 6010(1) 41(1)  |
| C(6)  | 6374(5)  |         | 2215(3) | 5651(1) 34(1)  |
| C(7)  | 4891(5)  |         | 3291(2) | 5629(1) 25(1)  |
| C(8)  | 4965(5)  |         | 4383(2) | 5298(1) 24(1)  |
| C(9)  | 5967(5)  |         | 4906(3) | 4873(1) 28(1)  |
| C(10) | 2959(5)  |         | 6137(2) | 5109(1) 25(1)  |
| C(11) | 1996(5)  |         | 5636(2) | 6344(1) 23(1)  |
| C(12) | 1425(5)  |         | 7014(2) | 6215(1) 24(1)  |
| C(13) | 1388(5)  |         | 7778(2) | 6697(1) 30(1)  |
| C(14) | -237(10) |         | 8752(3) | 6773(1) 74(2)  |
| C(15) | -238(11) |         | 9386(4) | 7226(1) 87(2)  |
| C(16) | 2810(5)  |         | 8150(3) | 7526(1) 33(1)  |
| C(17) | 3011(5)  |         | 7470(3) | 7082(1) 29(1)  |
| C(18) | 4863(7)  |         | 6417(4) | 7031(1) 70(1)  |
| C(19) | 4615(5)  |         | 5587(3) | 6575(1) 27(1)  |
| N(1)  | 4704(4)  |         | 6001(2) | 4760(1) 28(1)  |
| N(2)  | 3072(4)  |         | 5189(2) | 5442(1) 22(1)  |
| N(3)  | 1238(6)  |         | 9092(2) | 7608(1) 49(1)  |
| O(1)  | -849(3)  | 7120(2) |         | 5949(1) 29(1)  |

Table 3. Bond lengths [Å] and angles [°] for Compound ent-22.

|                 |            |                   |            |
|-----------------|------------|-------------------|------------|
| C(1)-N(2)       | 1.481(3)   | C(11)-C(12)       | 1.528(3)   |
| C(1)-C(2)       | 1.520(3)   | C(11)-C(19)       | 1.533(3)   |
| C(1)-C(11)      | 1.544(3)   | C(11)-H(11)       | 1.0000     |
| C(1)-H(1)       | 1.0000     | C(12)-O(1)        | 1.415(3)   |
| C(2)-C(3)       | 1.387(4)   | C(12)-C(13)       | 1.521(3)   |
| C(2)-C(7)       | 1.404(4)   | C(12)-H(12)       | 1.0000     |
| C(3)-C(4)       | 1.392(4)   | C(13)-C(14)       | 1.363(5)   |
| C(3)-H(3)       | 0.9500     | C(13)-C(17)       | 1.387(4)   |
| C(4)-C(5)       | 1.393(5)   | C(14)-C(15)       | 1.386(4)   |
| C(4)-H(4)       | 0.9500     | C(14)-H(14)       | 0.9500     |
| C(5)-C(6)       | 1.384(4)   | C(15)-N(3)        | 1.329(5)   |
| C(5)-H(5)       | 0.9500     | C(15)-H(15)       | 0.9500     |
| C(6)-C(7)       | 1.387(4)   | C(16)-N(3)        | 1.322(4)   |
| C(6)-H(6)       | 0.9500     | C(16)-C(17)       | 1.393(3)   |
| C(7)-C(8)       | 1.456(3)   | C(16)-H(16)       | 0.9500     |
| C(8)-C(9)       | 1.373(3)   | C(17)-C(18)       | 1.496(4)   |
| C(8)-N(2)       | 1.379(3)   | C(18)-C(19)       | 1.510(4)   |
| C(9)-N(1)       | 1.374(4)   | C(18)-H(18A)      | 0.9900     |
| C(9)-H(9)       | 0.9500     | C(18)-H(18B)      | 0.9900     |
| C(10)-N(1)      | 1.329(3)   | C(19)-H(19A)      | 0.9900     |
| C(10)-N(2)      | 1.343(3)   | C(19)-H(19B)      | 0.9900     |
| C(10)-H(10)     | 0.9500     | O(1)-H(1A)        | 0.8400     |
|                 |            |                   |            |
| N(2)-C(1)-C(2)  | 99.72(18)  | C(6)-C(7)-C(2)    | 121.1(2)   |
| N(2)-C(1)-C(11) | 113.25(19) | C(6)-C(7)-C(8)    | 131.2(2)   |
| C(2)-C(1)-C(11) | 112.82(19) | C(2)-C(7)-C(8)    | 107.7(2)   |
| N(2)-C(1)-H(1)  | 110.2      | C(9)-C(8)-N(2)    | 105.7(2)   |
| C(2)-C(1)-H(1)  | 110.2      | C(9)-C(8)-C(7)    | 146.5(2)   |
| C(11)-C(1)-H(1) | 110.2      | N(2)-C(8)-C(7)    | 107.4(2)   |
| C(3)-C(2)-C(7)  | 120.4(2)   | C(8)-C(9)-N(1)    | 109.2(2)   |
| C(3)-C(2)-C(1)  | 128.3(2)   | C(8)-C(9)-H(9)    | 125.4      |
| C(7)-C(2)-C(1)  | 111.1(2)   | N(1)-C(9)-H(9)    | 125.4      |
| C(2)-C(3)-C(4)  | 118.2(3)   | N(1)-C(10)-N(2)   | 110.8(2)   |
| C(2)-C(3)-H(3)  | 120.9      | N(1)-C(10)-H(10)  | 124.6      |
| C(4)-C(3)-H(3)  | 120.9      | N(2)-C(10)-H(10)  | 124.6      |
| C(3)-C(4)-C(5)  | 121.1(3)   | C(12)-C(11)-C(19) | 107.8(2)   |
| C(3)-C(4)-H(4)  | 119.5      | C(12)-C(11)-C(1)  | 112.10(18) |
| C(5)-C(4)-H(4)  | 119.5      | C(19)-C(11)-C(1)  | 113.5(2)   |
| C(6)-C(5)-C(4)  | 120.9(3)   | C(12)-C(11)-H(11) | 107.7      |
| C(6)-C(5)-H(5)  | 119.5      | C(19)-C(11)-H(11) | 107.7      |
| C(4)-C(5)-H(5)  | 119.5      | C(1)-C(11)-H(11)  | 107.7      |
| C(5)-C(6)-C(7)  | 118.2(3)   | O(1)-C(12)-C(13)  | 112.0(2)   |
| C(5)-C(6)-H(6)  | 120.9      | O(1)-C(12)-C(11)  | 111.2(2)   |
| C(7)-C(6)-H(6)  | 120.9      | C(13)-C(12)-C(11) | 108.52(18) |

|                   |          |                     |            |
|-------------------|----------|---------------------|------------|
| O(1)-C(12)-H(12)  | 108.4    | C(17)-C(18)-C(19)   | 116.6(3)   |
| C(13)-C(12)-H(12) | 108.4    | C(17)-C(18)-H(18A)  | 108.2      |
| C(11)-C(12)-H(12) | 108.4    | C(19)-C(18)-H(18A)  | 108.2      |
| C(14)-C(13)-C(17) | 117.8(2) | C(17)-C(18)-H(18B)  | 108.2      |
| C(14)-C(13)-C(12) | 122.3(2) | C(19)-C(18)-H(18B)  | 108.2      |
| C(17)-C(13)-C(12) | 119.8(2) | H(18A)-C(18)-H(18B) | 107.3      |
| C(13)-C(14)-C(15) | 119.7(3) | C(18)-C(19)-C(11)   | 112.8(2)   |
| C(13)-C(14)-H(14) | 120.1    | C(18)-C(19)-H(19A)  | 109.0      |
| C(15)-C(14)-H(14) | 120.1    | C(11)-C(19)-H(19A)  | 109.0      |
| N(3)-C(15)-C(14)  | 124.1(4) | C(18)-C(19)-H(19B)  | 109.0      |
| N(3)-C(15)-H(15)  | 118.0    | C(11)-C(19)-H(19B)  | 109.0      |
| C(14)-C(15)-H(15) | 118.0    | H(19A)-C(19)-H(19B) | 107.8      |
| N(3)-C(16)-C(17)  | 125.4(3) | C(10)-N(1)-C(9)     | 106.4(2)   |
| N(3)-C(16)-H(16)  | 117.3    | C(10)-N(2)-C(8)     | 107.9(2)   |
| C(17)-C(16)-H(16) | 117.3    | C(10)-N(2)-C(1)     | 138.2(2)   |
| C(13)-C(17)-C(16) | 117.7(3) | C(8)-N(2)-C(1)      | 113.80(19) |
| C(13)-C(17)-C(18) | 121.5(2) | C(16)-N(3)-C(15)    | 115.2(3)   |
| C(16)-C(17)-C(18) | 120.8(3) | C(12)-O(1)-H(1A)    | 109.5      |

---

Symmetry transformations used to generate equivalent atoms:

Table 4. Anisotropic displacement parameters ( $\text{\AA}^2 \times 10^3$ ) for Compound ent-22. The anisotropic displacement factor exponent takes the form:  $-2h^2a^2U_{11} + \dots + 2hkab^*U_{12}$

|       | U11    | U22    | U33   | U23    | U13    | U12   |
|-------|--------|--------|-------|--------|--------|-------|
| C(1)  | 23(1)  | 24(1)  | 21(1) | 2(1)   | 2(1)   | -3(1) |
| C(2)  | 29(1)  | 22(1)  | 24(1) | 0(1)   | -5(1)  | -5(1) |
| C(3)  | 45(2)  | 25(1)  | 26(1) | 2(1)   | -8(1)  | -7(1) |
| C(4)  | 68(2)  | 23(1)  | 30(1) | 2(1)   | -18(1) | -7(1) |
| C(5)  | 60(2)  | 23(2)  | 39(2) | -6(1)  | -23(2) | 10(1) |
| C(6)  | 40(2)  | 28(2)  | 35(1) | -8(1)  | -11(1) | 8(1)  |
| C(7)  | 26(1)  | 23(1)  | 26(1) | -3(1)  | -7(1)  | -3(1) |
| C(8)  | 22(1)  | 25(1)  | 25(1) | -6(1)  | -1(1)  | 0(1)  |
| C(9)  | 26(1)  | 30(1)  | 27(1) | -6(1)  | 5(1)   | -2(1) |
| C(10) | 30(1)  | 24(1)  | 21(1) | 1(1)   | 1(1)   | -1(1) |
| C(11) | 26(1)  | 25(1)  | 18(1) | 2(1)   | 2(1)   | -3(1) |
| C(12) | 25(1)  | 26(1)  | 19(1) | 3(1)   | 2(1)   | -2(1) |
| C(13) | 45(2)  | 21(1)  | 23(1) | 4(1)   | 3(1)   | -8(1) |
| C(14) | 142(4) | 43(2)  | 37(2) | -11(1) | -30(2) | 50(2) |
| C(15) | 155(5) | 57(2)  | 50(2) | -24(2) | -34(3) | 64(3) |
| C(16) | 37(2)  | 35(2)  | 27(1) | -4(1)  | 2(1)   | -7(1) |
| C(17) | 25(1)  | 33(1)  | 29(1) | -5(1)  | 4(1)   | -7(1) |
| C(18) | 39(2)  | 103(3) | 68(2) | -58(2) | -24(2) | 28(2) |
| C(19) | 30(1)  | 28(1)  | 24(1) | 0(1)   | -2(1)  | -1(1) |
| N(1)  | 32(1)  | 26(1)  | 25(1) | -1(1)  | 5(1)   | -3(1) |
| N(2)  | 23(1)  | 23(1)  | 20(1) | 0(1)   | 1(1)   | -1(1) |
| N(3)  | 74(2)  | 39(2)  | 33(1) | -10(1) | -2(1)  | 13(2) |
| O(1)  | 27(1)  | 31(1)  | 29(1) | 3(1)   | -1(1)  | 2(1)  |

Table 5. Hydrogen coordinates (  $\times 10^4$ ) and isotropic displacement parameters ( $\text{\AA}^2 \times 10^3$ ) for Compound ent-22.

---

|        | x     | y     | z    | U(eq) |    |
|--------|-------|-------|------|-------|----|
| H(1)   | -130  | 4647  | 5807 | 27    |    |
| H(3)   | 1010  | 2671  | 6547 | 38    |    |
| H(4)   | 3497  | 845   | 6581 | 48    |    |
| H(5)   | 6820  | 569   | 6031 | 49    |    |
| H(6)   | 7729  | 2102  | 5426 | 41    |    |
| H(9)   | 7321  | 4565  | 4687 | 33    |    |
| H(10)  | 1792  | 6814  | 5122 | 30    |    |
| H(11)  | 777   | 5359  | 6605 | 28    |    |
| H(12)  | 2803  | 7344  | 5999 | 28    |    |
| H(14)  | -1364 | 8995  | 6516 | 89    |    |
| H(15)  | -1365 | 10073 | 7266 | 105   |    |
| H(16)  | 3892  | 7918  | 7792 | 40    |    |
| H(18A) |       | 4731  | 5872 | 7331  | 84 |
| H(18B) |       | 6560  | 6790 | 7031  | 84 |
| H(19A) |       | 5005  | 4702 | 6668  | 33 |
| H(19B) |       | 5853  | 5859 | 6322  | 33 |
| H(1A)  | -742  | 7715  | 5742 | 44    |    |

---



### **Experimental data for SC-XRD on Compound ent-30**

X-ray quality crystals were grown from a saturated 1,2-dichloroethane/ethanol/methanol solution followed by the slow vapor diffusion of diisopropyl ether to deposit the crystal diffracted. A colorless plate 0.080 x 0.050 x 0.020 mm in size was mounted on a Cryoloop with Paratone oil. Data were collected in a nitrogen gas stream at 100(2) K using and scans. Crystal-to-detector distance was 60 mm and exposure time was 5 seconds per frame using a scan width of 2.0°. Data collection was 99.5% complete to 67.000° in theta. A total of 26837 reflections were collected covering the indices,  $-11 \leq h \leq 11$ ,  $-5 \leq k \leq 6$ ,  $-15 \leq l \leq 15$ . 2520 reflections were found to be symmetry independent, with an  $R_{\text{int}}$  of 0.0415. Indexing and unit cell refinement indicated a primitive, monoclinic lattice. The space group was found to be P 21 (No. 4). The data were integrated using the Bruker SAINT software program and scaled using the SADABS software program. Solution by iterative methods (SHELXT-2014) produced a complete heavy-atom phasing model consistent with the proposed structure. All non-hydrogen atoms were refined anisotropically by full-matrix least-squares (SHELXL-2014). All hydrogen atoms were placed using a riding model. Their positions were constrained relative to their parent atom using the appropriate HFIX command in SHELXL-2014. Absolute stereochemistry was unambiguously determined to be *R* at all chiral centers.

Table 1. Crystal data and structure refinement for Compound ent-30.

X-ray ID      Compound ent-30  
 Sample/notebook ID    Compound ent-30  
 Empirical formula    C<sub>17</sub>H<sub>16</sub>N<sub>4</sub>O  
 Formula weight      292.34  
 Temperature    100(2) K  
 Wavelength    1.54178 Å  
 Crystal system      Monoclinic  
 Space group    P 21  
 Unit cell dimensions    a = 9.6081(4) Å      alpha = 90°.  
                               b = 5.9379(2) Å      beta = 102.380(2)°.  
                               c = 13.0825(5) Å      gamma = 90°.  
 Volume          729.03(5) Å<sup>3</sup>  
 Z                2  
 Density (calculated)    1.332 Mg/m<sup>3</sup>  
 Absorption coefficient    0.695 mm<sup>-1</sup>  
 F(000) 308  
 Crystal size    0.080 x 0.050 x 0.020 mm<sup>3</sup>  
 Theta range for data collection    3.459 to 68.313°.  
 Index ranges    -11 ≤ h ≤ 11, -5 ≤ k ≤ 6, -15 ≤ l ≤ 15  
 Reflections collected    26837  
 Independent reflections    2520 [R(int) = 0.0415]  
 Completeness to theta = 67.000°    99.5 %  
 Absorption correction    Semi-empirical from equivalents  
 Max. and min. transmission    0.929 and 0.809  
 Refinement method    Full-matrix least-squares on F<sup>2</sup>  
 Data / restraints / parameters    2520 / 1 / 200  
 Goodness-of-fit on F<sup>2</sup>    1.040  
 Final R indices [I > 2σ(I)]    R<sub>1</sub> = 0.0261, wR<sub>2</sub> = 0.0663  
 R indices (all data)    R<sub>1</sub> = 0.0273, wR<sub>2</sub> = 0.0674  
 Absolute structure parameter    0.15(10)  
 Extinction coefficient    n/a  
 Largest diff. peak and hole    0.136 and -0.137 e.Å<sup>-3</sup>

Table 2. Atomic coordinates ( x 10<sup>4</sup>) and equivalent isotropic displacement parameters (Å<sup>2</sup>x 10<sup>3</sup>) for Compound ent-30. U(eq) is defined as one third of the trace of the orthogonalized U<sub>ij</sub> tensor.

|       | x        | y       | z       | U(eq)          |
|-------|----------|---------|---------|----------------|
| C(1)  | -2341(2) |         | 6147(3) | 6833(1) 23(1)  |
| C(2)  | -3695(2) |         | 4982(3) | 6983(1) 23(1)  |
| C(3)  | -4497(2) |         | 5426(4) | 7725(1) 27(1)  |
| C(4)  | -5639(2) |         | 3996(4) | 7767(1) 31(1)  |
| C(5)  | -5958(2) |         | 2179(4) | 7101(2) 32(1)  |
| C(6)  | -5156(2) |         | 1725(4) | 6353(1) 29(1)  |
| C(7)  | -4024(2) |         | 3143(4) | 6302(1) 24(1)  |
| C(8)  | -3017(2) |         | 3138(3) | 5612(1) 23(1)  |
| C(9)  | -2665(2) |         | 2247(3) | 4737(1) 26(1)  |
| C(10) | -1269(2) |         | 5098(4) | 5198(1) 26(1)  |
| C(11) | -1105(2) |         | 5811(3) | 7791(1) 21(1)  |
| C(12) | 329(2)   | 6647(3) |         | 7601(1) 22(1)  |
| C(13) | 1412(2)  |         | 6415(3) | 8616(1) 23(1)  |
| C(14) | 2575(2)  |         | 7671(4) | 9091(2) 29(1)  |
| C(15) | 3152(2)  |         | 6496(4) | 10010(2) 33(1) |
| C(16) | 179(2)   | 3032(3) |         | 9154(1) 25(1)  |
| C(17) | -895(2)  | 3342(3) |         | 8118(1) 25(1)  |
| N(1)  | -1572(2) |         | 3486(3) | 4486(1) 27(1)  |
| N(2)  | -2112(2) |         | 4935(3) | 5895(1) 23(1)  |
| N(3)  | 2416(2)  |         | 4656(3) | 10122(1) 31(1) |
| N(4)  | 1355(2)  |         | 4634(3) | 9247(1) 24(1)  |
| O(1)  | 270(2)   | 8871(2) |         | 7224(1) 27(1)  |

Table 3. Bond lengths [Å] and angles [°] for Compound ent-30.

|                 |            |                   |            |
|-----------------|------------|-------------------|------------|
| C(1)-N(2)       | 1.479(2)   | C(10)-H(10)       | 0.9500     |
| C(1)-C(2)       | 1.523(2)   | C(11)-C(17)       | 1.528(3)   |
| C(1)-C(11)      | 1.544(2)   | C(11)-C(12)       | 1.534(2)   |
| C(1)-H(1)       | 1.0000     | C(11)-H(11)       | 1.0000     |
| C(2)-C(3)       | 1.388(2)   | C(12)-O(1)        | 1.407(2)   |
| C(2)-C(7)       | 1.402(3)   | C(12)-C(13)       | 1.507(2)   |
| C(3)-C(4)       | 1.398(3)   | C(12)-H(12)       | 1.0000     |
| C(3)-H(3)       | 0.9500     | C(13)-N(4)        | 1.350(3)   |
| C(4)-C(5)       | 1.380(3)   | C(13)-C(14)       | 1.376(3)   |
| C(4)-H(4)       | 0.9500     | C(14)-C(15)       | 1.398(3)   |
| C(5)-C(6)       | 1.395(3)   | C(14)-H(14)       | 0.9500     |
| C(5)-H(5)       | 0.9500     | C(15)-N(3)        | 1.327(3)   |
| C(6)-C(7)       | 1.387(3)   | C(15)-H(15)       | 0.9500     |
| C(6)-H(6)       | 0.9500     | C(16)-N(4)        | 1.461(2)   |
| C(7)-C(8)       | 1.458(2)   | C(16)-C(17)       | 1.529(2)   |
| C(8)-C(9)       | 1.368(2)   | C(16)-H(16A)      | 0.9900     |
| C(8)-N(2)       | 1.376(2)   | C(16)-H(16B)      | 0.9900     |
| C(9)-N(1)       | 1.378(3)   | C(17)-H(17A)      | 0.9900     |
| C(9)-H(9)       | 0.9500     | C(17)-H(17B)      | 0.9900     |
| C(10)-N(1)      | 1.324(3)   | N(3)-N(4)         | 1.360(2)   |
| C(10)-N(2)      | 1.346(2)   | O(1)-H(1A)        | 0.8400     |
|                 |            |                   |            |
| N(2)-C(1)-C(2)  | 99.75(14)  | C(6)-C(7)-C(8)    | 131.24(18) |
| N(2)-C(1)-C(11) | 112.67(14) | C(2)-C(7)-C(8)    | 107.79(16) |
| C(2)-C(1)-C(11) | 111.47(14) | C(9)-C(8)-N(2)    | 105.65(16) |
| N(2)-C(1)-H(1)  | 110.8      | C(9)-C(8)-C(7)    | 146.59(19) |
| C(2)-C(1)-H(1)  | 110.8      | N(2)-C(8)-C(7)    | 107.28(16) |
| C(11)-C(1)-H(1) | 110.8      | C(8)-C(9)-N(1)    | 109.31(17) |
| C(3)-C(2)-C(7)  | 120.62(17) | C(8)-C(9)-H(9)    | 125.3      |
| C(3)-C(2)-C(1)  | 128.42(17) | N(1)-C(9)-H(9)    | 125.3      |
| C(7)-C(2)-C(1)  | 110.76(15) | N(1)-C(10)-N(2)   | 110.59(17) |
| C(2)-C(3)-C(4)  | 118.02(18) | N(1)-C(10)-H(10)  | 124.7      |
| C(2)-C(3)-H(3)  | 121.0      | N(2)-C(10)-H(10)  | 124.7      |
| C(4)-C(3)-H(3)  | 121.0      | C(17)-C(11)-C(12) | 106.62(15) |
| C(5)-C(4)-C(3)  | 121.34(18) | C(17)-C(11)-C(1)  | 112.56(15) |
| C(5)-C(4)-H(4)  | 119.3      | C(12)-C(11)-C(1)  | 112.83(14) |
| C(3)-C(4)-H(4)  | 119.3      | C(17)-C(11)-H(11) | 108.2      |
| C(4)-C(5)-C(6)  | 120.9(2)   | C(12)-C(11)-H(11) | 108.2      |
| C(4)-C(5)-H(5)  | 119.6      | C(1)-C(11)-H(11)  | 108.2      |
| C(6)-C(5)-H(5)  | 119.6      | O(1)-C(12)-C(13)  | 111.29(15) |
| C(7)-C(6)-C(5)  | 118.2(2)   | O(1)-C(12)-C(11)  | 113.02(15) |
| C(7)-C(6)-H(6)  | 120.9      | C(13)-C(12)-C(11) | 107.62(13) |
| C(5)-C(6)-H(6)  | 120.9      | O(1)-C(12)-H(12)  | 108.3      |
| C(6)-C(7)-C(2)  | 120.96(17) | C(13)-C(12)-H(12) | 108.3      |

|                     |            |
|---------------------|------------|
| C(11)-C(12)-H(12)   | 108.3      |
| N(4)-C(13)-C(14)    | 106.53(16) |
| N(4)-C(13)-C(12)    | 119.92(16) |
| C(14)-C(13)-C(12)   | 133.53(18) |
| C(13)-C(14)-C(15)   | 104.59(19) |
| C(13)-C(14)-H(14)   | 127.7      |
| C(15)-C(14)-H(14)   | 127.7      |
| N(3)-C(15)-C(14)    | 112.52(18) |
| N(3)-C(15)-H(15)    | 123.7      |
| C(14)-C(15)-H(15)   | 123.7      |
| N(4)-C(16)-C(17)    | 110.97(15) |
| N(4)-C(16)-H(16A)   | 109.4      |
| C(17)-C(16)-H(16A)  | 109.4      |
| N(4)-C(16)-H(16B)   | 109.4      |
| C(17)-C(16)-H(16B)  | 109.4      |
| H(16A)-C(16)-H(16B) | 108.0      |
| C(11)-C(17)-C(16)   | 112.78(16) |
| C(11)-C(17)-H(17A)  | 109.0      |
| C(16)-C(17)-H(17A)  | 109.0      |
| C(11)-C(17)-H(17B)  | 109.0      |
| C(16)-C(17)-H(17B)  | 109.0      |
| H(17A)-C(17)-H(17B) | 107.8      |
| C(10)-N(1)-C(9)     | 106.35(15) |
| C(10)-N(2)-C(8)     | 108.08(15) |
| C(10)-N(2)-C(1)     | 138.16(17) |
| C(8)-N(2)-C(1)      | 113.74(14) |
| C(15)-N(3)-N(4)     | 103.69(16) |
| C(13)-N(4)-N(3)     | 112.67(16) |
| C(13)-N(4)-C(16)    | 126.26(15) |
| N(3)-N(4)-C(16)     | 120.18(15) |
| C(12)-O(1)-H(1A)    | 109.5      |

---

Symmetry transformations used to generate equivalent atoms:

Table 4. Anisotropic displacement parameters ( $\text{\AA}^2 \times 10^3$ ) for Compound ent-30. The anisotropic displacement factor exponent takes the form:  $-2[h^2 a^2 U_{11} + \dots + 2 h k a^* b^* U_{12}]$

|       | U11   | U22   | U33   | U23   | U13   | U12   |
|-------|-------|-------|-------|-------|-------|-------|
| C(1)  | 28(1) | 24(1) | 17(1) | -2(1) | 5(1)  | 2(1)  |
| C(2)  | 24(1) | 26(1) | 20(1) | 2(1)  | 3(1)  | 5(1)  |
| C(3)  | 28(1) | 32(1) | 21(1) | 1(1)  | 4(1)  | 7(1)  |
| C(4)  | 24(1) | 44(1) | 23(1) | 6(1)  | 6(1)  | 7(1)  |
| C(5)  | 26(1) | 43(1) | 26(1) | 7(1)  | 3(1)  | -2(1) |
| C(6)  | 29(1) | 34(1) | 23(1) | -1(1) | 2(1)  | -3(1) |
| C(7)  | 24(1) | 29(1) | 18(1) | 1(1)  | 1(1)  | 4(1)  |
| C(8)  | 24(1) | 24(1) | 20(1) | -1(1) | 1(1)  | 1(1)  |
| C(9)  | 28(1) | 29(1) | 20(1) | -4(1) | 3(1)  | 0(1)  |
| C(10) | 26(1) | 33(1) | 19(1) | -1(1) | 6(1)  | 1(1)  |
| C(11) | 28(1) | 22(1) | 15(1) | -2(1) | 5(1)  | 0(1)  |
| C(12) | 28(1) | 20(1) | 18(1) | -2(1) | 8(1)  | 1(1)  |
| C(13) | 27(1) | 24(1) | 20(1) | -3(1) | 10(1) | 2(1)  |
| C(14) | 30(1) | 33(1) | 26(1) | -6(1) | 9(1)  | -5(1) |
| C(15) | 28(1) | 43(1) | 26(1) | -8(1) | 2(1)  | -4(1) |
| C(16) | 32(1) | 23(1) | 21(1) | 2(1)  | 6(1)  | -1(1) |
| C(17) | 28(1) | 24(1) | 21(1) | -2(1) | 3(1)  | -1(1) |
| N(1)  | 28(1) | 33(1) | 19(1) | -3(1) | 5(1)  | 2(1)  |
| N(2)  | 26(1) | 26(1) | 16(1) | -2(1) | 5(1)  | 0(1)  |
| N(3)  | 30(1) | 40(1) | 19(1) | -3(1) | 0(1)  | 2(1)  |
| N(4)  | 26(1) | 28(1) | 19(1) | 0(1)  | 3(1)  | 2(1)  |
| O(1)  | 36(1) | 22(1) | 26(1) | 2(1)  | 13(1) | 0(1)  |

Table 5. Hydrogen coordinates (  $\times 10^4$ ) and isotropic displacement parameters ( $\text{\AA}^2 \times 10^3$ ) for Compound ent-30.

---

|        | x     | y     | z     | U(eq) |    |
|--------|-------|-------|-------|-------|----|
| H(1)   | -2517 | 7785  | 6680  | 27    |    |
| H(3)   | -4275 | 6665  | 8191  | 32    |    |
| H(4)   | -6208 | 4281  | 8264  | 37    |    |
| H(5)   | -6733 | 1224  | 7152  | 38    |    |
| H(6)   | -5378 | 479   | 5891  | 35    |    |
| H(9)   | -3104 | 974   | 4361  | 31    |    |
| H(10)  | -556  | 6214  | 5215  | 31    |    |
| H(11)  | -1330 | 6678  | 8391  | 26    |    |
| H(12)  | 620   | 5641  | 7071  | 26    |    |
| H(14)  | 2912  | 9032  | 8848  | 35    |    |
| H(15)  | 3980  | 6964  | 10500 | 39    |    |
| H(16A) |       | -305  | 3253  | 9742  | 30 |
| H(16B) |       | 560   | 1477  | 9196  | 30 |
| H(17A) |       | -562  | 2496  | 7563  | 30 |
| H(17B) |       | -1822 | 2699  | 8183  | 30 |
| H(1A)  | 709   | 8953  | 6734  | 40    |    |

---



## References

- 1) Kumar, S.; Waldo, J. P.; Jaipuri, F. A.; Marcinowicz, A.; Van Allen, C.; Adams, J.; Kesharwani, T.; Zhang, X.; Metz, R.; Oh, A. J.; Harris, S. F.; Mautino, M. R. Discovery of clinical candidate (1*R*,4*r*)-4-((*R*)-2-((*S*)-6-fluoro-5*H*-imidazo[5,1-*a*]isoindol-5-yl)-1-hydroxyethyl)cyclohexan-1-ol (Navoximod), a potent and selective inhibitor of indoleamine 2,3-dioxygenase 1. *J. Med. Chem.* **2019**, *62*, 6705–6733.
- 2) Mautino, M.; Kumar, S.; Waldo, J.; Jaipuri, F.; Kesharwani, T. Fused imidazole derivatives useful as IDO inhibitors. WO2012142237A1, October 18, 2012.
- 3) Xingyu, L.; Yuen, P.-w.; Mendonca, R.; Parr, B.; Pastor, R.; Pei, Z.; Gazzard, L.; Jaipuri, F.; Kumar, S.; Li, X.; Pavana, R.; Potturi, H.; Velvadapu, V.; Waldo, J.; Zhang, Z.; Wu, G. TDO2 inhibitors. WO2017107979A1, June 29, 2017.
- 4) Armer, R.; Bingham, M.; Pesnot, T.; Gignoux, C. 4*H*-Imidazo[1,5-*a*]indole derivatives and their use as indoleamine 2,3-dioxygenase (IDO) and/or tryptophan 2,3-dioxygenase (TDO2) modulators. WO2016051181A1, April 7, 2016.
- 5) Abu-Zied, K. M.; Abu-Bakr, S. M.; Gaafar, A. E.-D. M.; Tokuda, H. Synthesis of novel benzimidazole hydrazine derivatives and its C-nucleosides with antitumor activity. *J. Appl. Sci. Res.* **2013**, *9*, 852–859.
- 6) Bochevarov, A. D.; Harder, E.; Hughes, T. F.; Greenwood, J. R.; Braden, D. A.; Philipp, D. M.; Rinaldo, D.; Halls, M. D.; Zhang, J.; Friesner, R. A. Jaguar: A high-performance quantum chemistry software program with strengths in life and materials sciences. *Int. J. Quantum Chem.* **2013**, *113*, 2110–2142.
- 7) Meininger, D.; Zalameda, L.; Liu, Y.; Stepan, L.P.; Borges, L.; McCarter, J. D.; Sutherland, C. L. Purification and kinetic characterization of human indoleamine 2,3-dioxygenases 1 and 2 (IDO1 and IDO2) and discovery of selective IDO1 inhibitors. *Biochim Biophys Acta.* **2011**, *1814*, 1947–1954.
- 8) McCoy, A. J.; Grosse-Kunstleve, R. W.; Adams, P. D.; Winn, M. D.; Storoni, L. C.; Read, R. J. Phaser crystallographic software. *J. Appl. Cryst.* **2007**, *40*, 658–674.
- 9) Emsley, P.; Cowtan, K. Coot: model-building tools for molecular graphics. *Acta Crystallogr D Biol Crystallogr.* **2004**, *60*, 2126–2132.
- 10) Bricogne, G.; Blanc, E.; Brandl, M.; Flensburg, C.; Keller, P.; Paciorek, W.; Roversi, P.; Sharff, A.; Smart, O. S.; Vonrhein, C.; Womack, T. O. BUSTER version 2.11.4. *Global Phasing Ltd.* **2011**.
